# Supplementary material for: Transcriptomic exploration combined with experimental validation: uncovering the potential value of biomarkers related to ammonia-induced cell death in hepatic ischemia–reperfusion injury
Source: Eur J Med Res. 2025 Nov 26;30:1180. doi: 10.1186/s40001-025-03450-1 (PMC12659301; doi:10.1186/s40001-025-03450-1)
Supplement: Supplementary file 2 — Additional file 2. Reverse transcription reaction program [file 40001_2025_3450_MOESM2_ESM.xlsx]

## Sheet: Sheet1
Temperature	Time
25℃	5min
55℃	15min
85℃	5min
4℃	hold
