# Supplementary material for: Transcriptomic exploration combined with experimental validation: uncovering the potential value of biomarkers related to ammonia-induced cell death in hepatic ischemia–reperfusion injury
Source: Eur J Med Res. 2025 Nov 26;30:1180. doi: 10.1186/s40001-025-03450-1 (PMC12659301; doi:10.1186/s40001-025-03450-1)
Supplement: Supplementary file 3 — Additional file 3. Amplification conditions [file 40001_2025_3450_MOESM3_ESM.xlsx]

## Sheet: Sheet1
	Temperature	Time
Pre-denaturation	95℃	1min
Denaturation	95℃	20s
Annealing	55℃	20s
Extension	72℃	30s
