# Supplementary material for: Transcriptomic exploration combined with experimental validation: uncovering the potential value of biomarkers related to ammonia-induced cell death in hepatic ischemia–reperfusion injury
Source: Eur J Med Res. 2025 Nov 26;30:1180. doi: 10.1186/s40001-025-03450-1 (PMC12659301; doi:10.1186/s40001-025-03450-1)
Supplement: Supplementary file 4 — Additional file 4. Information on 762 key module genes [file 40001_2025_3450_MOESM4_ESM.xlsx]

## Sheet: Sheet1
	net.colors	color
COX1	6	red
ND4L	6	red
HLA-B	6	red
C1QB	9	magenta
S100A9	6	red
C1QC	9	magenta
CD68	9	magenta
C1QA	9	magenta
IFI30	6	red
SH3BGRL3	6	red
CD74	9	magenta
FCER1G	6	red
GNAI2	9	magenta
VIM	6	red
MARCO	6	red
LAPTM5	6	red
LGALS3BP	9	magenta
S100A8	6	red
S100A11	6	red
LIPA	9	magenta
HLA-DRA	9	magenta
TYROBP	6	red
CLIC1	6	red
LCP1	6	red
FCGR3A	9	magenta
ARHGDIB	6	red
COTL1	6	red
VSIG4	9	magenta
LYZ	6	red
HCLS1	9	magenta
S100A6	6	red
SRGN	6	red
ARRB2	6	red
MS4A6A	9	magenta
CTSS	9	magenta
HLA-DPA1	9	magenta
S100A12	6	red
RHOG	6	red
RGS2	6	red
PPT1	9	magenta
MPEG1	9	magenta
ITGB2	9	magenta
MCOLN1	9	magenta
SHKBP1	9	magenta
CYBA	6	red
CSF1R	9	magenta
TSC22D4	9	magenta
FPR1	6	red
FOLR2	9	magenta
IFNGR2	6	red
GMFG	6	red
MAPK3	9	magenta
VCAM1	9	magenta
CSF3R	6	red
SDC3	9	magenta
TGFB1	6	red
FCGR3B	9	magenta
FSCN1	9	magenta
MS4A7	9	magenta
BASP1	6	red
MBOAT7	6	red
EMP3	6	red
CYBB	9	magenta
GPNMB	9	magenta
PTPN6	9	magenta
S100A4	6	red
AIF1	6	red
EVI2B	9	magenta
HMGB2	6	red
HLA-DMA	9	magenta
GPSM3	6	red
FXYD5	6	red
RAC2	6	red
CD53	6	red
LILRB5	9	magenta
SPI1	6	red
RGL2	9	magenta
NECAP2	9	magenta
CORO1A	6	red
HCK	6	red
AGTRAP	6	red
MMP9	6	red
S100P	6	red
SIPA1	9	magenta
UCP2	6	red
THEMIS2	6	red
SLA	6	red
VSIR	6	red
CFP	9	magenta
SCPEP1	9	magenta
FERMT3	6	red
CCND3	6	red
FGR	6	red
MYO1F	9	magenta
AXL	9	magenta
PILRA	6	red
CPNE2	9	magenta
HLA-F	6	red
LST1	6	red
SLC25A37	6	red
FCGR2C	6	red
MNDA	6	red
GNG10	6	red
SLC7A7	9	magenta
SLC11A1	6	red
RNASE6	9	magenta
ABTB1	9	magenta
FCGR2A	6	red
ALOX5AP	6	red
PLBD1	6	red
MOB3A	6	red
TIMD4	9	magenta
LGALS9	6	red
NCF2	6	red
SELL	6	red
SEPTIN6	9	magenta
TRIM22	9	magenta
LCP2	6	red
MS4A4A	9	magenta
CST7	6	red
SLC15A3	9	magenta
CD52	6	red
LILRB2	6	red
WAS	6	red
SIGLEC1	9	magenta
NPL	9	magenta
RGL1	9	magenta
NAGK	9	magenta
HK3	9	magenta
SLC7A8	9	magenta
HLA-DPB1	9	magenta
ADGRL4	9	magenta
PREX1	9	magenta
ITGAX	6	red
HLA-DMB	9	magenta
ARHGAP4	9	magenta
BCL2A1	6	red
G6PD	6	red
RNF149	6	red
MFNG	9	magenta
PYCARD	6	red
SELPLG	9	magenta
RPS6KA1	9	magenta
TNFSF13	9	magenta
PRKCD	6	red
RASSF2	6	red
METTL9	6	red
RILPL2	6	red
EBI3	6	red
SLC16A3	6	red
ADA2	9	magenta
CD300A	6	red
RENBP	9	magenta
WIPF1	9	magenta
CHST15	9	magenta
TNFSF12-TNFSF13	9	magenta
CXCR4	6	red
RAB31	6	red
LRRC25	6	red
PTPRC	6	red
ALOX5	6	red
IGSF6	6	red
GRK6	6	red
NCF4	6	red
LILRB1	6	red
LILRA5	6	red
ADAP2	9	magenta
LGALS3	6	red
LILRB3	6	red
ITGAM	6	red
LSP1	6	red
ARHGAP45	6	red
KCNAB2	9	magenta
SAMSN1	6	red
CLEC2B	6	red
C3AR1	6	red
CYRIB	6	red
IMPDH1	6	red
SIGLEC7	9	magenta
CD37	6	red
LAT2	6	red
IL10RA	9	magenta
GMIP	6	red
NBEAL2	6	red
CPVL	9	magenta
ANKRD13D	9	magenta
ADAM8	6	red
ATG16L2	9	magenta
BIN2	9	magenta
UNC13D	6	red
CXCR2	6	red
ARHGAP30	6	red
PLEKHO1	6	red
LILRA6	6	red
IL2RG	6	red
IL1R2	6	red
OAS3	9	magenta
DOK3	6	red
FPR3	9	magenta
CLIC2	9	magenta
MICAL1	6	red
VNN2	6	red
CXCR1	6	red
TNFRSF10C	6	red
P2RY13	9	magenta
NFAM1	9	magenta
LIMD2	6	red
NCF1	6	red
NKG7	6	red
LMNB1	6	red
MMP25	6	red
TMC6	9	magenta
PPM1M	9	magenta
CASP1	6	red
CMTM3	6	red
INPP5D	9	magenta
CD177	6	red
PLCB2	9	magenta
IL10	6	red
CCL5	9	magenta
SASH3	9	magenta
IRAK3	6	red
TLR2	6	red
PIK3R5	9	magenta
SLC12A6	9	magenta
GLIPR1	6	red
FMNL1	6	red
ALDH3B1	9	magenta
ARHGAP9	6	red
CMKLR1	9	magenta
FPR2	6	red
PRF1	6	red
CD86	9	magenta
FGD2	9	magenta
CLEC7A	6	red
GLIPR2	6	red
HCST	6	red
GNG2	9	magenta
FCN1	6	red
FCAR	6	red
ANXA3	6	red
DOCK8	9	magenta
APOBR	6	red
MS4A6E	9	magenta
MCEMP1	6	red
NCKAP1L	9	magenta
ARHGAP25	9	magenta
FYB1	9	magenta
CSF2RB	6	red
EPB41L3	6	red
SLC37A2	9	magenta
NRROS	6	red
CDKN2D	6	red
SIRPB1	6	red
SLC1A3	9	magenta
VAV1	9	magenta
TNFAIP8L2	9	magenta
CMTM7	6	red
CLEC4E	6	red
PTAFR	9	magenta
SIGLEC9	9	magenta
CNRIP1	6	red
PADI4	6	red
LY96	6	red
JAML	6	red
IL7R	6	red
RGS19	6	red
PGLYRP1	6	red
SCIMP	9	magenta
RCSD1	9	magenta
PLAC8	9	magenta
CYTIP	6	red
SSH2	9	magenta
NLRP1	9	magenta
ABCA7	9	magenta
VCAN	6	red
TRPV2	6	red
CAPG	6	red
TBXAS1	9	magenta
PARVG	9	magenta
APOBEC3A	6	red
SH2D3C	9	magenta
TMEM106A	9	magenta
NRGN	6	red
LILRA2	6	red
SIGLEC5	6	red
RASGRP4	6	red
RCBTB2	9	magenta
SYK	9	magenta
KREMEN1	9	magenta
RAB3D	9	magenta
HOMER3	6	red
STK17B	6	red
C19orf38	6	red
APOBEC3C	9	magenta
ADGRG3	6	red
ADAP1	6	red
SH3BP1	9	magenta
GZMB	6	red
TLR1	9	magenta
PIK3CD	9	magenta
RIPOR2	6	red
CD84	9	magenta
SEMA4A	6	red
SYTL3	6	red
JAK3	6	red
CR1	9	magenta
NIBAN1	6	red
PTPRE	6	red
PRAM1	9	magenta
OSCAR	6	red
KCNQ1	9	magenta
DENND3	6	red
QPCT	6	red
PRKCB	9	magenta
DEF6	9	magenta
CD48	6	red
ARHGAP26	6	red
GPR34	9	magenta
FGD3	9	magenta
GCA	6	red
IRAG2	9	magenta
CARD16	6	red
C5AR2	6	red
ADCY7	9	magenta
MX2	6	red
TMC8	9	magenta
CCDC88B	6	red
ATP2A3	6	red
NAIP	9	magenta
CEACAM3	6	red
GNLY	6	red
EVI2A	6	red
SIGLEC11	9	magenta
MMP8	6	red
ACAP1	6	red
SLC6A6	6	red
TBC1D10C	9	magenta
S1PR4	6	red
AP1S2	6	red
CTSW	9	magenta
NFE2	6	red
FABP3	9	magenta
CYP2S1	9	magenta
LPAR2	6	red
KCNE3	9	magenta
MGAM	6	red
TBKBP1	9	magenta
PROK2	6	red
BST1	6	red
RETN	6	red
CEACAM4	6	red
EMB	6	red
BTK	6	red
LTB	6	red
TLR8	9	magenta
DOK1	9	magenta
TMEM71	6	red
GBP5	6	red
APH1B	9	magenta
RUNX3	6	red
LILRA1	6	red
MARCHF1	6	red
HVCN1	9	magenta
C16orf54	6	red
FCMR	6	red
DOCK2	9	magenta
RIPK3	6	red
CELF2	9	magenta
IL2RB	9	magenta
LOXL3	9	magenta
DOCK11	9	magenta
AOAH	9	magenta
RASAL3	9	magenta
TREM1	6	red
ENTPD1	9	magenta
GAS7	6	red
IL18RAP	6	red
FOLR3	6	red
SAMD9L	9	magenta
PFKFB2	6	red
MICB	9	magenta
MEFV	6	red
PPCDC	6	red
DPEP2	9	magenta
HK2	6	red
HCAR2	6	red
SIRPB2	9	magenta
DGKA	6	red
SIGLEC16	9	magenta
LPAR5	6	red
HCAR3	6	red
ARHGAP15	6	red
APOBEC3F	9	magenta
GZMA	9	magenta
ADGRE1	6	red
GFRA2	9	magenta
IL6	6	red
HPSE	6	red
LPCAT2	9	magenta
PLXNC1	6	red
CD58	6	red
NLRC4	9	magenta
SLC9A9	9	magenta
PLA2G7	9	magenta
CD69	6	red
CD244	9	magenta
TAGAP	6	red
C1orf74	6	red
SLAMF8	9	magenta
AATK	6	red
SH2B2	6	red
OSM	6	red
PTGER4	6	red
PSTPIP1	9	magenta
CD180	6	red
HRH2	6	red
CLEC4D	6	red
FCGR1A	6	red
CD247	6	red
ORAI2	6	red
APOBEC3G	9	magenta
HLA-DOA	9	magenta
RGS18	6	red
RNF24	6	red
SEMA4D	6	red
GPR65	9	magenta
TRIM34	9	magenta
CD8A	9	magenta
FFAR2	6	red
PADI2	6	red
CD7	6	red
SPOCK2	6	red
GPR160	6	red
SPIC	9	magenta
TNFSF13B	6	red
CAMP	6	red
FAR2	9	magenta
APOBEC3B	6	red
CASS4	6	red
GNGT2	6	red
PPP1R3D	9	magenta
GAB3	9	magenta
PEAK3	6	red
IKBKE	9	magenta
ALAS2	6	red
TMEM150B	9	magenta
RUBCNL	6	red
ZNF185	9	magenta
TNFAIP6	6	red
ZNF100	9	magenta
TLR5	9	magenta
GPR132	6	red
CA4	6	red
SYTL1	6	red
RSAD2	6	red
TRAF3IP3	6	red
KLRK1	9	magenta
PHOSPHO1	6	red
IRAG1	9	magenta
CMTM2	6	red
TRIM6-TRIM34	9	magenta
AMPD3	9	magenta
GCNT1	9	magenta
TLR6	9	magenta
CD300LF	9	magenta
ZNF107	6	red
SLAMF7	6	red
PHACTR1	6	red
P2RX1	6	red
PRDM1	6	red
BMX	6	red
CCND2	6	red
ST8SIA4	9	magenta
SMIM35	9	magenta
CMTM1	6	red
HSH2D	6	red
PLA2G4A	9	magenta
PI3	6	red
POU2F2	6	red
GRIP2	6	red
SNX20	6	red
CSF2RA	6	red
INKA2	6	red
AGAP2	6	red
OTULINL	9	magenta
CARD11	6	red
IKZF1	9	magenta
PPBP	6	red
PFKFB4	9	magenta
CCDC200	9	magenta
LRRK1	9	magenta
MILR1	6	red
B3GNT8	6	red
KLRC4-KLRK1	9	magenta
CCR2	6	red
GPR84	6	red
CNTNAP3	9	magenta
TASL	9	magenta
IL12RB1	9	magenta
TREML2	6	red
B3GNTL1	9	magenta
PTPN7	6	red
KCNJ15	6	red
APOBEC3D	9	magenta
CRISP3	6	red
SLFN12	9	magenta
TRPM2	9	magenta
WDFY4	9	magenta
CLEC4A	6	red
CLC	6	red
CX3CR1	6	red
GPR82	9	magenta
CD6	9	magenta
MCTP2	6	red
ITK	6	red
TFEC	9	magenta
ZAP70	9	magenta
C5orf58	6	red
VENTX	6	red
FGFBP2	6	red
SPN	9	magenta
TMEM154	6	red
HACD4	9	magenta
TNFSF8	6	red
ARL11	6	red
KRT23	6	red
PTPN22	6	red
VAV3	9	magenta
MCTP1	6	red
TUBB1	6	red
NLRP12	6	red
PIK3CG	6	red
CR1L	6	red
GAPT	6	red
ADGRE3	6	red
TMEM132E	9	magenta
ASPRV1	6	red
IKZF3	9	magenta
C11orf21	9	magenta
CATIP	6	red
P2RX5	9	magenta
SP140	6	red
ITGA2B	6	red
RAB39A	9	magenta
PF4	6	red
DAPP1	9	magenta
HAS1	6	red
PATL2	9	magenta
ROPN1L	6	red
CASP5	6	red
IPCEF1	9	magenta
FUT7	6	red
CERKL	9	magenta
CD300LB	6	red
CLEC5A	6	red
SERPINB2	6	red
CABP4	9	magenta
CAMKK1	9	magenta
NHSL2	6	red
LILRA4	6	red
CYSLTR1	9	magenta
ZC3H12D	6	red
HBG2	6	red
DAPK2	6	red
SLC45A4	6	red
MYL4	6	red
P2RY8	6	red
SH2D1B	6	red
ESM1	6	red
TSPAN32	9	magenta
LOC400499	6	red
BTNL8	6	red
CD5	6	red
ANKRD22	6	red
HBG1	6	red
TM6SF1	9	magenta
SNCA	6	red
GPR27	6	red
S1PR5	6	red
PLB1	6	red
LOC112268067	6	red
PIK3R6	9	magenta
LINGO3	6	red
NTNG2	6	red
SLC26A8	6	red
TRIM58	6	red
PF4V1	6	red
LAX1	6	red
SIRPD	6	red
MYBL1	6	red
TNNI2	6	red
GFI1	9	magenta
SBK3	6	red
ANKS1B	9	magenta
GP1BB	6	red
RUNX2	9	magenta
RASGRP1	6	red
KIR2DL4	6	red
VSTM1	6	red
CPNE5	6	red
TSPAN2	9	magenta
MYBPC3	6	red
CCNJL	6	red
LOC112267855	6	red
IL21R	6	red
MPIG6B	6	red
CRTAM	6	red
IL19	6	red
PRDM8	6	red
OPRL1	9	magenta
FBXO41	9	magenta
LIPN	6	red
AIM2	6	red
CD300H	6	red
TNFRSF4	6	red
TARP	9	magenta
DNAH17	6	red
DCSTAMP	6	red
ZBP1	6	red
KCNK7	6	red
PTGES	6	red
NCR1	6	red
RHOH	6	red
CD96	9	magenta
FCRL3	6	red
PTPRO	9	magenta
ZNF273	9	magenta
RASGEF1A	6	red
ATP2C2	6	red
ADGRB1	6	red
PKD2L1	6	red
NDST3	9	magenta
HOPX	6	red
FBN2	9	magenta
TNFRSF8	6	red
RNF175	6	red
RAB19	6	red
P2RY10	6	red
ACP3	6	red
CXCL11	6	red
H2BC26	6	red
TMEM121B	6	red
GJB6	6	red
TTN	9	magenta
RPH3A	6	red
GPR141	6	red
CCR4	6	red
KIR3DL2	6	red
ELAPOR1	6	red
CFAP161	6	red
TREML1	6	red
RTP5	6	red
SLC24A4	9	magenta
LRRN1	6	red
BNC1	6	red
DLGAP3	6	red
LOC105375112	6	red
LTA	6	red
GCSAM	6	red
BCL11B	9	magenta
OTX1	6	red
SPSB4	9	magenta
DRC7	6	red
FCRL1	6	red
GP9	6	red
TRPM6	6	red
PRKCG	6	red
TREML4	6	red
AANAT	6	red
N4BP3	6	red
UBASH3A	9	magenta
TMEM89	6	red
IL12A	6	red
LGI2	6	red
NME8	6	red
LRRC15	6	red
CDH26	6	red
OR2W3	6	red
XIRP1	6	red
TMEM272	6	red
PNPLA1	6	red
TMEM40	6	red
TKTL1	6	red
KCNJ5	6	red
LGALS12	6	red
FAM209B	6	red
BANK1	6	red
TNNT1	6	red
SLC10A6	6	red
DUSP13	6	red
HRH4	6	red
ISL2	6	red
TAS2R40	6	red
TSPAN16	6	red
CCDC62	6	red
SCRG1	6	red
LOXHD1	6	red
CCR3	6	red
KRTAP1-1	6	red
CLEC17A	6	red
RGS17	6	red
LIPM	6	red
STPG4	6	red
KRT72	6	red
LGALS7	6	red
LY6G6F	6	red
KIAA0319	6	red
C9orf50	6	red
HBE1	6	red
LY6G6F-LY6G6D	6	red
PSCA	6	red
CD300LD	6	red
KRT1	6	red
CLEC6A	6	red
GJB7	6	red
EN2	6	red
CLEC4C	6	red
LKAAEAR1	6	red
EFHC2	6	red
TRIML1	6	red
FABP6	6	red
RALYL	6	red
KRT5	6	red
CACNA1E	6	red
AQP12B	6	red
AQP10	6	red
NKX2-6	6	red
SPACA5B	6	red
PROKR2	6	red
LRRC74B	6	red
KRT39	6	red
ZNF705A	6	red
ONECUT3	6	red
CPLX2	6	red
SPINK8	6	red
LRRIQ1	6	red
SBSN	6	red
DNAH8	9	magenta
IRX4	6	red
SSTR3	6	red
KY	6	red
SH2D7	6	red
LRRC18	6	red
RIMS4	6	red
BMP15	6	red
KHDRBS2	6	red
SLC9A4	6	red
SPATA31E1	6	red
KCNG3	6	red
IL36RN	6	red
PRR9	6	red
TRIML2	6	red
PGLYRP4	6	red
CLEC2L	6	red
TKTL2	6	red
OR4C6	6	red
KRT9	6	red
MRGPRX1	6	red
NEUROG2	6	red
SYT14	6	red
GLRA3	6	red
