# Supplementary material for: Transcriptomic exploration combined with experimental validation: uncovering the potential value of biomarkers related to ammonia-induced cell death in hepatic ischemia–reperfusion injury
Source: Eur J Med Res. 2025 Nov 26;30:1180. doi: 10.1186/s40001-025-03450-1 (PMC12659301; doi:10.1186/s40001-025-03450-1)
Supplement: Supplementary file 5 — Additional file 5. Information on 586 DEGs [file 40001_2025_3450_MOESM5_ESM.xlsx]

## Sheet: Sheet1
	baseMean	log2FoldChange	lfcSE	stat	pvalue	sig
SPRN	172.717892466486	-1.76962	0.320778031282761	-5.51665	0.000000034551399535943	down
IQSEC3	25.1508131167902	0.922891356387519	0.193504728419518	4.76934782899304	0.00000184823295203392	up
HTRA3	52.484399826242	0.868696242410957	0.193005955888418	4.50087790510037	0.00000676733719970546	up
CDH15	33.0354766006207	2.01375581139436	0.454902286644007	4.42678762125078	0.0000095646820012077	up
ADAM22	6.89715240098047	0.987354754196102	0.226768229723258	4.3540259382941	0.0000133659881582671	up
COL5A3	667.958893602012	1.04863711480613	0.242051405128626	4.33229096211561	0.0000147565746719699	up
CD38	181.234616159885	0.779256238812068	0.181476217727011	4.29398545204572	0.000017549397891892	up
FGF21	245.619219233588	-1.61644	0.391822006990305	-4.12544	0.0000370019335546617	down
AHSG	26551.0895390369	-0.687049	0.167696509058147	-4.09698	0.0000418582774376825	down
AK7	44.2893143357191	0.790913556538698	0.194307154927579	4.07042940252758	0.0000469265606706059	up
HKDC1	74.3653803996895	-1.51611	0.372563048838243	-4.0694	0.0000471334630146845	down
APOA2	43861.7896214047	-0.702994	0.173133598069761	-4.06041	0.0000489860971041754	down
ITGA2	50.2711715965977	1.08614822954058	0.2677618439591	4.05639658541673	0.0000498356127386475	up
IL17D	10.1720637138698	0.982703687664186	0.244399435473208	4.02089180673215	0.0000579782307933208	up
SNX10	527.35983483806	0.531378210631926	0.132330487329436	4.01553883277906	0.0000593101316230175	up
SLC17A3	295.587182786177	-0.639883	0.159608565638855	-4.00908	0.0000609558129614486	down
WFDC2	24.0441564934524	1.46259233913012	0.365507998968677	4.00153305333124	0.0000629334016508874	up
CYP1B1	220.006917424333	0.552999631545394	0.138340341143095	3.99738519491858	0.0000640460356642906	up
DIO2	6.42619878653473	2.37558488896246	0.601703072454353	3.9481016430121	0.0000787733604598986	up
FAM83A	16.7595346050443	1.28965161402858	0.327924015293594	3.93277574646049	0.0000839705682768169	up
LRP2	36.1648039983153	0.97459195154224	0.247988167485095	3.92999376311299	0.0000849480649901738	up
PERM1	5.77518398017879	1.14525270395998	0.29355504565349	3.90132181652849	0.0000956688673467987	up
RPS4X	6497.56129796933	-0.677451	0.174550141470632	-3.88113	0.000103974284139799	down
AKR1B15	10.233565380737	-2.11833	0.547943751682003	-3.86596	0.000110653423556512	down
IL7R	155.466405189638	0.740092472720811	0.191538830356249	3.86392916435947	0.000111577590447734	up
TNFRSF8	7.14483570553653	1.16315776781933	0.302821556020944	3.84106661065727	0.000122500864373913	up
PIN4	214.113446240326	-0.601774	0.15748689700127	-3.8211	0.000132856053997281	down
SPTBN4	21.4914602039865	0.633457323925505	0.166229516283843	3.81073913999638	0.000138551910048094	up
MX1	438.223378465201	0.747916489071776	0.196592010931538	3.80440937313691	0.00014214293981354	up
AKR1B10	99.5590220764446	-1.89953	0.508184933756646	-3.73786	0.000185591310768582	down
SIGLEC16	58.1597892601843	0.597598292143013	0.160410611729993	3.7254286714454	0.00019498358403267	up
RSAD2	35.7782311341925	0.761965443375599	0.206174347306706	3.69573350578913	0.000219252861472248	up
UBASH3B	106.10922592661	0.63457148308062	0.1726147747199	3.67622924578926	0.000236706828683992	up
CNTN1	7.07319416837135	0.991902111425408	0.270507902673318	3.66681380330426	0.000245591487230387	up
FSTL4	4.22935581509083	-2.30659	0.631721766099068	-3.65127	0.000260943491613125	down
SPINK1	2595.73190518898	-1.16863	0.320079525018203	-3.65106	0.000261161227343299	down
TNC	308.097182974006	0.971624426350639	0.26731867117759	3.63470468437706	0.00027829923458552	up
ADAMTS9	347.056647281967	0.958031535137642	0.265320543473919	3.61084566838985	0.000305200240109978	up
INHBE	1636.45272077823	-1.01387	0.281243645963693	-3.60497	0.000312192111649851	down
LCP1	2350.9835374504	0.527222373580707	0.146674251848606	3.59451210376649	0.000325000036915702	up
MKX	26.5393739383787	-0.905124	0.25183904651858	-3.59406	0.000325565770004366	down
ENPP2	348.770933779871	-0.820306	0.229992305017525	-3.56667	0.00036155105878447	down
IL32	2414.92830069053	0.9656815007474	0.270870578847281	3.56510295380533	0.000363713388059426	up
IHH	49.5903239536232	-0.622872	0.175888970597131	-3.54128	0.000398188255496203	down
PLEKHN1	20.6334314866609	1.13620027108164	0.321330574260001	3.53592332039433	0.000406352623042401	up
MYO1G	94.4330873739489	0.835235645218882	0.237079174775798	3.52302409525742	0.000426652569969936	up
PNLDC1	3.05970999486832	1.45228748174794	0.413071615650815	3.51582492411102	0.00043838996587783	up
P2RY6	22.1343311411641	0.784207398863987	0.223621656322849	3.50684907606535	0.000453446252406835	up
NEB	110.482466735356	-0.892214	0.254832430475897	-3.50118	0.000463206793378789	down
ADGRB1	11.2391154224194	0.990453127959259	0.283652579667088	3.49178255005371	0.000479808689688219	up
FAM131C	7.08727779466949	1.79891971507374	0.515926096046425	3.48677791036155	0.000488877152295943	up
TAS1R3	16.3953904304106	-0.80729	0.232352441187106	-3.47442	0.000511956101899336	down
PNPLA4	480.395323036165	-0.559074	0.16092103630452	-3.47421	0.000512359184604688	down
SIGLEC5	95.6788519855757	0.658376305821873	0.189790924200617	3.4689556868691	0.000522485625717578	up
FITM1	247.633974795552	-0.735724	0.212536448911565	-3.46164	0.000536904745539685	down
MEDAG	21.4220994667029	1.80652502815754	0.523206116262303	3.45279799300331	0.000554804306727717	up
TMED6	82.5833399191915	-0.907089	0.263611005279594	-3.44101	0.000579542249565698	down
CEACAM20	4.04923884296289	1.27743636459792	0.371466639176543	3.43889929773963	0.000584084461443851	up
GCNT4	48.6833102608142	0.961239204519622	0.28021592729183	3.43035177839318	0.000602799204377353	up
DPEP1	2.65146990381474	-1.24905	0.364175153941878	-3.4298	0.000604017471068398	down
HIVEP3	161.752931684871	0.669313084327481	0.195497607023856	3.42363824558633	0.000617888144132606	up
CYTH4	229.343785682024	0.565223323068162	0.165158823059111	3.4223017129752	0.0006209336945356	up
COL4A5	43.5649181025561	0.676226495171856	0.197838661521218	3.41807051246822	0.000630667657864903	up
GRAP2	22.4255826024663	0.921870695744393	0.270066411775597	3.41349629405375	0.000641350308004835	up
DEPDC1	7.29933455708309	-1.77344	0.520649013178191	-3.40621	0.000658705274435525	down
BCAT1	72.4555111553515	0.634919829504652	0.186870443413983	3.39764715010647	0.00067968023433367	up
ATP10B	1.68951001564354	2.69062612524169	0.791940608430719	3.39750998572146	0.000680021060976483	up
PTH2R	5.71541407911604	2.1285811608671	0.627530291808192	3.39199746793691	0.000693850813977699	up
SPTBN5	88.1673253031989	0.90087988955216	0.265735765722568	3.39013413231206	0.000698584338386366	up
CDC20	18.3506365365829	-1.38688	0.409385709558824	-3.3877	0.000704817459523334	down
DBNDD1	131.284924044017	0.707636077268459	0.208908019609819	3.38730929808306	0.000705817669487587	up
CMPK2	82.1900065792467	0.576952566587233	0.170766316707573	3.37860871927822	0.000728536192760928	up
BATF	19.6333328971389	0.898429287538798	0.265952250146707	3.37816012853133	0.000729725747504522	up
MUC3A	840.474635417595	0.949257094929389	0.282603799837526	3.35896791010997	0.00078234151583559	up
ECEL1	17.0470290029093	1.80009474689328	0.537395653678251	3.34966376183428	0.000809097118333833	up
PEG10	79.1733795441737	0.971819070291051	0.291080000734065	3.33866657908566	0.000841815400956635	up
TBC1D30	52.1499	0.755786068010564	0.227078465987997	3.3283035655636	0.00087376599857368	up
IGFBP2	11867.3942949468	-0.768508	0.23097617641341	-3.32722	0.000877174276965054	down
MMP3	19.0107252946652	3.42333303117994	1.02930025360141	3.32588379260772	0.000881386665768123	up
RASD2	4.64321917350216	0.951529342108822	0.286980398714313	3.31565969791569	0.000914270864737541	up
WT1	3.27358782053515	1.95738851820618	0.590614273771374	3.31415714982175	0.00091919829857537	up
ASTN1	11.8740243368065	-0.800966	0.241810548528635	-3.31237	0.000925087938777778	down
NPR3	78.7674302009963	0.667224272968802	0.201436945790242	3.3123232203073	0.000925245804861791	up
TUSC3	102.086956227732	-0.517323	0.156232578876599	-3.31123	0.00092885586408536	down
CYP3A7	1662.34491953701	-0.952313	0.288030535546172	-3.30629	0.000945398596411598	down
CSF2RA	52.4722001886289	0.574255804129313	0.174312604590955	3.29440206275886	0.000986313084161275	up
AGBL4	7.6166017800318	1.32922367865545	0.4047440827411	3.28410898475248	0.00102305352039257	up
CCR5	24.9592820008025	0.763728754698336	0.232702110116369	3.28200184483249	0.00103072930753044	up
GTSF1	3.98517889239243	1.91212187139115	0.582773891347995	3.28106989653961	0.00103414113307706	up
PCDHA13	8.02614791474416	-1.124	0.343030464213671	-3.27669	0.00105031879364955	down
WNT9B	47.9634031163718	1.80547107508358	0.554617240314361	3.25534610871495	0.00113254255086056	up
RTN1	17.6258067441841	0.710203614818431	0.218335038067428	3.25281558610442	0.00114267629897168	up
HEY1	34.5799430278664	0.558122193696941	0.171726381833885	3.25006669177264	0.00115377947248673	up
HSPA6	472.190953425724	1.51284605157343	0.465981416353004	3.24658022505209	0.00116800524010484	up
TPX2	95.9268277370504	-0.698245	0.215214156484997	-3.24442	0.00117690462175637	down
CCL15	157.47013125107	-0.525128	0.161895680276957	-3.24362	0.00118021347605398	down
MEFV	65.9242474426019	0.768285549268565	0.237260445196731	3.2381526917878	0.00120306401962293	up
SH3TC2	23.9559632353835	0.710533875344046	0.219725844492262	3.23372918186267	0.00122185258117769	up
ADM2	61.970222511028	-0.80678	0.249658222877576	-3.23154	0.00123125853286459	down
SLAMF1	14.984191957645	1.20768611277785	0.373762856913626	3.23115604035779	0.00123290612897218	up
F13A1	142.220466342284	0.756962974608793	0.234452388235276	3.22864262678857	0.00124379219225807	up
SMCO2	1.94491556618433	1.24088809097502	0.387688860631577	3.20073	0.00137079028503465	up
LOXL2	237.982649412821	0.53434495198321	0.167035708819883	3.19898634704152	0.00137911699842521	up
SLC16A3	234.517277312291	0.670209267336703	0.209537570105045	3.19851598451158	0.0013813687490291	up
PNMA6A	79.2472006633187	-0.581953	0.182049742936011	-3.19667	0.00139024936905442	down
FAM124A	46.9800250274157	0.523660831973923	0.16423713094747	3.18844361779196	0.00143040902379754	up
SHBG	289.062903746885	-0.690675	0.217482355580435	-3.17577	0.0014943763555	down
CD274	190.00445732224	1.10397669140097	0.347639442939146	3.17563703953529	0.00149507886264869	up
NOTUM	76.6928368850632	-0.693167	0.219062243086985	-3.16425	0.00155484302341724	down
ITGAX	492.770562562709	0.906000808310211	0.286747524717116	3.15957673637812	0.00157998487411405	up
PTPRE	296.438595030393	0.727493247570337	0.231009641125071	3.14918998197338	0.00163723720464322	up
CLGN	91.4430678596546	-1.11849	0.355933951140502	-3.14241	0.00167564774778628	down
ROM1	44.2180142395047	0.601897921684254	0.191658825320749	3.14046546344502	0.00168679594806611	up
ACTG2	43.8934857031299	1.19170097539039	0.380330988518668	3.13332600120723	0.00172837359710058	up
NAB2	457.581202394398	-0.52267	0.167907686172616	-3.11284	0.00185296241298765	down
LGR5	17.5377623168432	-0.856603	0.275654344446504	-3.10752	0.00188661588315547	down
EBF1	18.8763457835681	0.552306370154369	0.177743798232643	3.10731724901857	0.00188793674069916	up
LOC105375112	2.89210106360234	1.2988120901005	0.419018630454691	3.09965236794152	0.00193747895274203	up
PFN3	0.614799486858958	-1.62332	0.524614713904703	-3.0943	0.00197275756665616	down
KDELR3	160.578668906363	-0.715056	0.231167696658352	-3.09323	0.00197988638662356	down
A4GALT	66.4430884654544	0.609456857022428	0.197229561108476	3.09008879600573	0.00200096663760834	up
B3GNT8	23.4159990054047	0.64547254216723	0.208953325360924	3.08907523272151	0.00200780588644645	up
FHDC1	16.4486275997108	0.890965224355709	0.288965995311551	3.08328744146904	0.00204727304686844	up
SLC17A8	11.1438514060467	0.778478134936276	0.252853846278399	3.07876722618311	0.00207859020288827	up
GNA15	60.7174128399214	0.573341353318089	0.186261994084657	3.07814461095859	0.00208293809899212	up
TMIGD2	4.6284700073948	0.911911725595225	0.297794087795091	3.06222239785601	0.00219700153373591	up
ADIRF	229.551274365789	-0.662109	0.216370087725246	-3.06008	0.00221280866556832	down
MIOX	29.7995819951182	-0.796585	0.260648229273605	-3.05617	0.00224184728790704	down
CYP51A1	3695.77384862845	0.527071244701079	0.172734401495618	3.05133916659009	0.002278230663029	up
TROAP	16.1030765022535	-1.19715	0.392861440791219	-3.04725	0.00230945773030606	down
LPAR5	42.7119937699989	0.50506991830929	0.166014285048185	3.04232806329103	0.00234755887546076	up
ASPM	37.769357648901	-0.952144	0.313620094736061	-3.03598	0.0023975538820251	down
HK2	95.0746788944356	0.680181518292191	0.224339848392228	3.03192465880152	0.00242999847137358	up
RDH12	35.9331789385538	-0.788114	0.260963363847284	-3.02002	0.00252760220066115	down
DHRS9	29.1376319731552	0.890224956479213	0.294796474221109	3.01979512757506	0.00252945721809322	up
OAS2	307.783408538478	0.579449400780828	0.192151401415688	3.01558769028847	0.00256481763145325	up
CCNB2	10.3770056125777	-1.16073	0.385278212994126	-3.0127	0.00258934507384964	down
PCDHB8	5.95406347929636	0.656153708943031	0.218561286504829	3.00214973765967	0.00268080276678509	up
CD300C	39.9428565780091	0.556248275617074	0.185322765893841	3.0015107584554	0.00268643546325529	up
ASRGL1	110.139307569361	0.720922611920439	0.240223904028733	3.00104444158151	0.00269055293982916	up
ARPP21	23.3896886575713	0.955828378307067	0.318652877094215	2.99959123866458	0.00270342142211523	up
LAIR1	216.112851551122	0.605851823492132	0.202052971270749	2.99848014944703	0.00271329831129359	up
EDNRA	37.0966698586345	0.525934088910336	0.175864837268508	2.99055852823693	0.00278467758945646	up
NDRG4	43.2237387018225	0.593549590817699	0.198674159605959	2.98755304663132	0.0028122048687053	up
LPL	20.6582985208809	0.940436612892553	0.314867741462915	2.98676710584313	0.0028194441913687	up
FRZB	19.1977509979244	0.572093646419314	0.191582422149534	2.98614893788524	0.0028251501055484	up
SPRED3	11.9889909383436	1.22416627321545	0.41058763831558	2.9814981236102	0.00286841804511151	up
PTCHD3	0.804757150413117	2.1323189254764	0.716516132224492	2.97595382654738	0.00292078834505733	up
TMC4	56.5034096745863	-0.872759	0.294161251539347	-2.96694	0.00300777326198816	down
FLT1	1396.9228744622	0.595123281639121	0.200915669636458	2.96205508866458	0.00305593102772508	up
MARCHF3	36.7649017965565	0.652697654414876	0.220592870963095	2.95883385335726	0.00308805544719306	up
ULK4	54.5407490557759	0.590474854624342	0.199857943602962	2.95447278191444	0.0031320377969676	up
SLC43A2	267.527172844049	0.504496395493066	0.17086756562117	2.95255798640909	0.00315152872981361	up
TEAD4	101.052149658936	0.745445552608938	0.252908277401468	2.94749369323968	0.00320361287074889	up
ARL11	20.825215119456	0.527299919621666	0.179649244448919	2.9351635807831	0.00333371890378968	up
PRRX1	2.58729399209104	1.66660280260276	0.568436937611844	2.93190447757425	0.00336890350109986	up
CCNB1	33.5748356101965	-0.717249	0.24498443254522	-2.92773	0.00341442037095517	down
HMGCS1	10211.9385756909	0.733511063019887	0.250733856808034	2.92545678656183	0.00343950942248153	up
GP2	1.57686292490577	2.08900853969896	0.714438577982115	2.9239861957052	0.00345580071836001	up
LGI2	8.02644349401435	0.888374884353996	0.304582706286545	2.91669509140887	0.00353761410491215	up
GSTO2	97.2560946026967	-0.533936	0.183098601937323	-2.91611	0.00354424889333334	down
PTGER3	6.11964534363828	1.21891430124907	0.41873129650746	2.91097014103255	0.00360308448181115	up
IL20RB	94.4100113737926	1.00978298971134	0.347325105108694	2.90731356547157	0.00364547573266913	up
SLC8A3	3.97660768347155	1.15650855009453	0.398310355697214	2.90353623387508	0.0036897427230002	up
DEFB132	16.1418812169405	1.22940332722661	0.423844601575455	2.9005992353255	0.00372449886081505	up
SLC25A53	18.537007467866	-0.527603	0.18205404831419	-2.89806	0.00375482477488396	down
FABP5	56.018215487781	0.790966532064302	0.273046689187264	2.8968178827535	0.00376968518371565	up
GFPT2	61.8535680206472	0.91372931761573	0.315825388940773	2.89314713006522	0.00381402588176805	up
IFI16	531.367194223651	0.503770304682104	0.17425001114761	2.89107760375034	0.00383923304014684	up
CFAP46	14.9409285776033	0.605135477828486	0.209315991835901	2.89101407169547	0.00384000925976191	up
NRIP3	10.0854487079824	1.30121566288467	0.45079457690516	2.88649360384481	0.00389560665254349	up
SLC34A2	44.6836361435493	0.742911955878845	0.257567584717605	2.88433793675306	0.00392237589320833	up
RET	91.8283350382662	0.944732997434729	0.329007355111901	2.87146467322413	0.00408574446344995	up
SLC5A6	2297.30659368541	0.555843080419967	0.194010159728322	2.86502047726949	0.0041698227686566	up
VSTM2L	35.3739960391692	-0.605999	0.211853543629507	-2.86046	0.00423021753313652	down
CHI3L2	1.8892195652705	1.16234678305307	0.406856818192408	2.85689395158024	0.00427808746206989	up
BOLA3	147.559813508368	-0.527293	0.184924307560071	-2.8514	0.00435270304819466	down
PLCH2	173.334264273958	0.739788666758179	0.259526338749546	2.85053405493501	0.00436458762401484	up
CLVS2	0.824364864095397	-2.61066	0.915884781499808	-2.85043	0.00436606339561145	down
VDR	37.8139793327678	0.774748710373761	0.272320636766804	2.84498714299497	0.0044413215700386	up
CYP3A7-CYP3A51P	1519.24254083489	-0.837243	0.295219184626509	-2.836	0.00456820032272887	down
PRDM8	7.83318773036845	0.748537743986727	0.264098266895188	2.83431524480165	0.00459240042874267	up
SLC7A11	9.71742416020982	-1.36638	0.482480623842069	-2.83199	0.00462590413664571	down
PLAU	68.5086379415976	1.00205885769215	0.353992493468822	2.83073476466362	0.0046441215190588	up
FCGR1A	36.0901555599263	0.544503032714363	0.192387372399955	2.83024309715293	0.00465126483881927	up
CENPA	3.20269593029579	-1.27253	0.45094380779444	-2.82192	0.00477370705097836	down
GALNT17	3.0967267397095	0.889115729622188	0.315406599857909	2.8189509351508	0.0048180882286893	up
GUCY2C	13.0996772382771	0.557112151355964	0.197968646692148	2.81414335383271	0.00489074131039114	up
GJA1	184.447597476627	0.85541619929855	0.304338871621048	2.81073592322339	0.00494283362519009	up
CD44	723.409763333056	0.538668032078072	0.192215984442817	2.80241018268865	0.00507223378570006	up
NABP1	488.46407422927	0.679184784455503	0.242428013630246	2.80159365365838	0.00508508789987387	up
CYP4Z1	4.13807245423882	-0.814523	0.290747876612176	-2.80148	0.00508692863918365	down
CXCR6	15.8002406464668	0.557146156039987	0.199209218268226	2.79678902855698	0.00516132234800405	up
TCERG1L	0.535354826441317	1.66628041600525	0.596397552087027	2.79390887869054	0.00520751499941099	up
EDN1	41.1293	0.65528741994139	0.234770405377997	2.79118408849842	0.00525155945725426	up
NAALAD2	35.9184513788077	0.615801110895664	0.220722594930101	2.78993236324843	0.00527190536021984	up
SCGN	42.6883927547278	-0.702895	0.252448965526338	-2.7843	0.00536427288991949	down
BLK	29.5368952657206	-0.541636	0.195483547030704	-2.77075	0.00559270080174538	down
LRRC43	2.73995646736049	0.933249857963613	0.337515532666796	2.76505750887898	0.0056912761184525	up
IL24	6.61408843653374	0.999797997047869	0.361726300354516	2.76396268689337	0.00571040688775804	up
IQGAP3	23.7359939140358	-1.19425	0.432368636822889	-2.7621	0.00574308880158871	down
ENTREP2	2.36630710538564	-0.870294	0.315239228003598	-2.76074	0.00576700539134839	down
TOP2A	45.053475484146	-1.12382	0.407916076166632	-2.75504	0.00586854194791016	down
CD180	72.8367464660027	0.545669758499693	0.19864465649815	2.74696419284137	0.00601497010212399	up
CFAP74	172.057813636376	1.13624041094522	0.414267607433732	2.74276914380031	0.00609235001586295	up
PHF24	2.95848850937042	0.810031229174334	0.29569442999032	2.73941997893181	0.0061547695513573	up
PGA4	14.3192798018377	0.690105677291851	0.252739697274132	2.73049973840609	0.00632383833010795	up
ERFL	2.51147536008129	-0.643168	0.236152358531984	-2.72353	0.00645883287808123	down
EMILIN2	142.321095895481	0.552408641791762	0.202950882405721	2.72188341949377	0.00649110368681876	up
SYCE1	44.4968	-0.857888	0.315246587663565	-2.72132	0.00650210977032949	down
MMP1	10.9793184531023	2.24659880976053	0.825851930492753	2.72034093135809	0.0065214639800445	up
SLC26A4	2.11472317296456	1.05359581599371	0.387728760925851	2.71735275319232	0.006580642942881	up
KIAA0319	2.63593712972451	1.00764900410662	0.370853871441126	2.71710525817333	0.00658556601320533	up
GPR17	84.3693733788125	0.544144726300413	0.200294356015124	2.71672520946784	0.00659313223551667	up
MKI67	79.6038360397088	-1.05204	0.387469273393445	-2.71515	0.0066245481279688	down
SYT7	3903.40783107631	0.580409632606639	0.21381184858027	2.71458123794641	0.00663596223980532	up
TMEM74B	31.0484745387986	0.518858020662398	0.191267052200067	2.71274124160009	0.00667291904294433	up
CCDC170	21.4182139528465	0.52469193629722	0.193446927808372	2.71233015815572	0.006681201005402	up
TLCD3A	61.0236252769219	0.644481904519556	0.23773948838351	2.71087444875758	0.00671060305252254	up
CCDC163	17.8607867334868	-0.64223	0.23722400816253	-2.70727	0.00678388009091735	down
C9orf152	32.7109926435616	-0.950974	0.351322205483635	-2.70684	0.00679264439201432	down
MMRN1	789.001588695511	0.520948593884321	0.192627989804551	2.70442833574133	0.00684220267802288	up
KBTBD8	33.6656420576769	0.557592440692456	0.206181034060386	2.70438279269251	0.00684314064731016	up
SH3D21	73.9808288075561	0.685644981896758	0.25410316737866	2.69829372443447	0.00696959160360208	up
TSGA13	4.20638089779939	0.505657741078894	0.188287466360947	2.68556240546329	0.00724078515475749	up
SLC16A6	35.4765153644442	0.527181460082911	0.196509438597075	2.68272844218873	0.00730242594661425	up
FIGNL2	42.6566313185471	0.648463740552153	0.242057737937051	2.67896306921943	0.00738505385661376	up
B3GAT1	218.365553530383	-0.767671	0.286592904310558	-2.67861	0.00739277708128985	down
CD79A	11.0515387009494	-0.603499	0.225386064687317	-2.67762	0.00741469002905689	down
TFPI2	270.416707289966	0.810252432128532	0.302760390994424	2.67621675829932	0.00744584721339322	up
ADGRE2	261.157846789001	0.503556437040502	0.18819980405016	2.67564804109091	0.00745849250498351	up
TBX15	462.957483758582	-0.508136	0.189969536519874	-2.67483	0.00747669798384646	down
SLC24A5	0.525035649538256	1.36648962524485	0.510991840237498	2.67419069668458	0.00749098416806136	up
BIRC5	26.8657463865253	-0.858359	0.321423493896875	-2.67049	0.00757403408283562	down
ARSI	4.83308163364926	0.715788654601822	0.268142841542965	2.66943040687934	0.00759800167740349	up
SLC12A8	206.065681292798	-0.518941	0.195207835073538	-2.6584	0.00785117188327449	down
CENPF	31.1020169505507	-0.794235	0.298821346242088	-2.65789	0.00786311926763193	down
CCNA2	29.2482845422123	-0.800193	0.301228935810351	-2.65643	0.00789729823484999	down
KCNN4	12.297486934358	1.0482339952072	0.395083072939053	2.65319895233504	0.00797328594379264	up
IL2RA	59.3946512774587	0.851529855393614	0.321689849821268	2.64705229545392	0.00811967953641882	up
C1QTNF12	10.5246266267905	0.5468877328054	0.206857940521615	2.64378409369426	0.00819849331185762	up
TAF4B	12.5627381561145	0.647766220111717	0.245405117831286	2.6395791002087	0.0083009049382699	up
BEST4	4.45366770439066	0.867741881670074	0.32882503533762	2.63891671380533	0.0083171411343478	up
GNG4	3.47427176414824	1.71219964446092	0.649103698356061	2.63779061619474	0.00834480888294709	up
RPS12	3176.50352184209	-0.589852	0.223646139873881	-2.63743	0.00835358307503214	down
PTK6	63.7405210618207	0.608719291650274	0.23084769600264	2.6368870133463	0.00836706953804823	up
CENPE	17.253446755102	-0.693829	0.263130697205656	-2.63682	0.00836865093908007	down
HJURP	12.9387244116683	-1.04521	0.396412374700116	-2.63667	0.00837231895924317	down
FOXD4L6	1.08283741566485	1.1662855588071	0.442339071437335	2.63663247069126	0.00837334989061487	up
GHRHR	19.0083494097671	1.26360527121054	0.479414376555361	2.63572669699576	0.00839573233552478	up
JAK3	185.817507761757	0.604043586511353	0.22942948953385	2.63280708917863	0.00846824304746726	up
GPR88	236.439444709171	-0.756602	0.287501106879359	-2.63165	0.00849719475135351	down
CKMT1B	1.06815510196893	-1.37558	0.523863847147733	-2.62584	0.00864345587416685	down
PAQR5	26.0130938991224	0.59307893100472	0.225920714075063	2.62516402461294	0.00866072346661447	up
VWCE	400.972955439501	0.652413244923634	0.248538063979202	2.62500332737053	0.00866481205026117	up
ULBP3	35.4263263392383	0.527772875135473	0.20140005484164	2.62052001699036	0.00877957757746137	up
ETV2	19.2328968653279	-0.6226	0.237653735581489	-2.61978	0.00879870927823301	down
KCNE1	61.6281225767464	0.549987638078578	0.209971800598387	2.61934048529945	0.00880999648864587	up
SLC4A7	131.886683494832	0.527876866450011	0.201589119744327	2.61857816096182	0.00882970611031643	up
PLA2G1B	8.68622459072451	-0.687089	0.262472720045785	-2.61775	0.00885110711525735	down
RUNX2	15.9393626177084	0.539110372225202	0.20599845891429	2.61706022009373	0.00886906927826701	up
AJUBA	417.858503483752	-0.508573	0.194868152248592	-2.60983	0.0090587548390008	down
HACD1	12.6529262438784	0.554231271464663	0.212421230682486	2.60911430408335	0.0090776914502491	up
P2RX5	10.2171558218932	0.570567580229041	0.219047879004005	2.6047619489555	0.00919381124954134	up
AQP4	22.1674340177967	0.809965533106381	0.310977184539641	2.60458185800808	0.00919864446889985	up
IGSF22	7.29014383707686	0.55219546423712	0.212059114737321	2.60396948709857	0.0092150960404662	up
BMAL2	215.082762221835	0.687456921521418	0.264512252496221	2.59896059647082	0.00935065060273257	up
NPTX1	0.919373432992629	1.78657071101109	0.687523573674265	2.59855920497866	0.00936158998594069	up
TRIM36	10.8957682061476	0.556421231089079	0.214144561586835	2.59834397365003	0.00936746052653666	up
WWC1	886.885780131023	0.551460177748989	0.212652090189917	2.59325068122531	0.00950734441486159	up
CXCL13	497.461559055835	-1.04606	0.40347995023959	-2.59259	0.00952570077445115	down
SELE	131.547513923659	0.675672398841534	0.260646634173961	2.59229282197665	0.009533858524574	up
SLC16A14	58.1668288294488	0.676190054971195	0.260904641151657	2.59171340144212	0.00954992921572399	up
RSPH1	4.13279694353597	-0.749319	0.289235904986691	-2.59068	0.00957855403097685	down
RGS4	32.1042554968745	0.567988183364187	0.219480817674267	2.58787163900192	0.00965709596406743	up
PCDHA2	3.26277135369964	-0.68098	0.263258409930583	-2.58674	0.00968897862153243	down
CLCN1	2.78061995933468	1.3175022184203	0.509384727658065	2.58645802844858	0.00969679792457442	up
DIO3	9.95199140865377	1.17546061266201	0.454819188896091	2.58445694763895	0.00975324802688264	up
SLC22A12	1.25837327353214	-1.72277	0.666771793941152	-2.58375	0.00977317406774937	down
ASIC1	3.77711344694195	0.878103677681893	0.339999930853266	2.58265840077731	0.00980423441018399	up
EFCAB12	65.9012054967299	-0.639578	0.247799595693217	-2.58103	0.0098506310976399	down
MECOM	43.5117467523758	0.523581132860783	0.203218268502827	2.57644717041519	0.00998214582032049	up
PLK1	33.0996712700663	-0.632048	0.24545269095723	-2.57503	0.010023104828961	down
HIF1A	1930.8713272138	0.558839394499318	0.217219891828722	2.57268977437832	0.0100911615304875	up
PCDH11Y	0.794691320765671	1.32586693696145	0.516021916165397	2.5694	0.0101874661309049	up
PGA3	14.2056453526032	0.666679387302577	0.259539373713385	2.56870230425541	0.0102080108870033	up
CACNA1F	1.84757444097159	1.15910923681672	0.45134919162883	2.56809862145476	0.0102258058805984	up
NR2E1	0.81326564095188	1.86297682848967	0.72558171333822	2.56756309350545	0.0102416149555524	up
FBN3	2.75392406404237	-1.2436	0.484447943660672	-2.56704	0.0102570379112844	down
PCDHAC1	9.86096868453812	-0.784113	0.305498432082839	-2.56667	0.0102680697994649	down
CDHR2	1463.43299471294	0.50620133822168	0.197242883820206	2.56638581031445	0.0102764455006386	up
HECW1	1.39769433714054	1.36035302352542	0.530927399391311	2.56222041862036	0.0104005287915655	up
OSM	31.2362026834326	1.15487410212726	0.451121104587852	2.56001	0.0104669443029249	up
SUMO4	3.81745214811534	-0.865427	0.338555520834004	-2.55623	0.0105811836608444	down
NPTX2	63.590972702106	0.948676206930466	0.371386519224792	2.55441745411404	0.0106365646721436	up
ACKR3	317.203136667506	0.8571625351492	0.336343404412316	2.54847433873989	0.0108195246490702	up
LRRTM2	15.2612019859678	0.633549326162806	0.24888014639486	2.54560010245916	0.0109090080828855	up
AFP	65.9469295374837	-0.650669	0.255677150031887	-2.54488	0.01093141406358	down
DACT2	60.7040781811857	0.967306828599392	0.380181597270871	2.54432838291804	0.0109488099073155	up
NKAIN2	1.96212	1.20558278399241	0.474041187076297	2.54320260952002	0.0109841515882258	up
MLNR	0.799744614596398	1.70778778841721	0.671964843345054	2.54148	0.0110383049704032	up
ANKRD33	6.21573228654821	1.78026578284699	0.701113158242059	2.53919893232463	0.0111106626981874	up
PLPP7	4.3191816958955	0.66169400203288	0.260616476132029	2.5389569065375	0.0111183517278902	up
KIF21B	156.738396171472	0.53060474224148	0.209258801662584	2.53563882630392	0.0112242429713377	up
LRRTM1	2.42615151894518	1.68416270389835	0.665233368067546	2.53168705110317	0.0113515253923616	up
RPL39L	43.9613137465904	-0.512335	0.202713050697677	-2.52739	0.0114913541285557	down
ANGPT2	124.903341628413	0.606337811785117	0.239929765243189	2.52714710561461	0.0114993325136054	up
PGA5	13.321166284879	0.614091620122867	0.243071446821714	2.52638320194509	0.0115243701312895	up
CXCL9	27.8950542257001	-0.835885	0.330952464262167	-2.52569	0.0115469781152327	down
SLC28A3	13.3093631507917	0.697253666903478	0.276144699375946	2.52495763445464	0.0115712237771017	up
MAL	3.24545245295714	-0.840298	0.333153229536074	-2.52226	0.0116604559785949	down
PIK3R6	13.1537397189356	0.575595912487635	0.228614800776319	2.51775436469142	0.0118105655462375	up
TNFSF15	4.99900890039994	1.33664423961827	0.531390165121321	2.51537255928157	0.0118906657288211	up
CBX4	820.391345585221	-0.548458	0.218462469390176	-2.51054	0.0120548090995635	down
ERMN	5.5079541036694	-0.799897	0.318791590975583	-2.50915	0.0121020929549968	down
JPH1	11.6190812862784	0.831793853167826	0.333001984113743	2.49786455591722	0.0124943921895914	up
RNF133	0.766471733921957	-1.21708	0.48738234888852	-2.49718	0.012518546951239	down
FOXD4L3	0.814326785661634	1.2226319743451	0.489610231311181	2.49715364621952	0.0125194698723366	up
FOXP3	162.520407349108	1.0128079954958	0.405916859888465	2.49511191965294	0.0125917407468537	up
GPR85	15.1861008108468	0.639584313484046	0.256644527554922	2.49210189508979	0.0126989600641657	up
RPL3L	4.99269	-0.605661	0.243049613565186	-2.49192	0.0127053479198859	down
DYDC2	7.79017578286791	-0.710163	0.285260381699886	-2.48952	0.0127913954723077	down
FXYD1	1350.43824032343	-0.514703	0.20684607418725	-2.48834	0.0128341918493142	down
TTK	6.68728767524422	-1.08917	0.438050684636972	-2.48639	0.0129045115453309	down
FAM83F	97.4632578658275	-0.60306	0.242692576985317	-2.48487	0.0129598727709652	down
OLAH	12.5733334196746	0.731970894381439	0.294994408530755	2.48130430006142	0.0130902568779743	up
RNF224	0.976470295596352	1.26202623947256	0.50884281796948	2.48018876341545	0.0131312846048001	up
IGSF11	1.23300729805803	-1.13469	0.4575261258593	-2.48007	0.0131358280809469	down
GTSE1	15.8376254609932	-0.754754	0.304383416800664	-2.47962	0.0131523367596603	down
XKR9	25.5785201292674	-0.920927	0.372176924670188	-2.47443	0.0133447747950414	down
MMP10	8.59890829428163	2.05650706963705	0.833378576051643	2.46767451040115	0.0135993915107023	up
BCAS1	2.96344519680495	1.37396566634868	0.557162449552709	2.46600550243777	0.0136629235366221	up
PNMA3	4.34375886723931	-0.824785	0.334682386466205	-2.46438	0.0137249615064922	down
KIF4A	10.5615091606208	-0.991841	0.402595935201469	-2.46361	0.0137544555413659	down
DUSP4	46.8918	0.676590112890594	0.274733283544222	2.46271621756993	0.0137889005132283	up
ZFY	124.417330599308	0.778795008036928	0.316405377199971	2.46138360519936	0.0138402297558786	up
KLHL6	104.177720853405	0.521766456379652	0.212146910779187	2.45945818613749	0.0139146905589435	up
GSDMC	2.49174273484028	1.2380189801357	0.504234185070888	2.45524602811619	0.0140788196194185	up
CDCP1	44.3303433363536	0.562253641578396	0.229253363170533	2.45254260963734	0.0141850578325971	up
VCAN	425.102546275861	0.764090443539989	0.311577937467289	2.45232525046869	0.0141936301980231	up
AURKB	15.7035126971646	-0.714352	0.291332397464958	-2.45202	0.0142057633690425	down
KIF4B	1.04152053067199	-1.25337	0.511820512403837	-2.44885	0.0143313699046208	down
DUOX2	19.5351796011399	1.47370824926562	0.602519412181676	2.44591	0.0144487067183904	up
PTX3	21.8522864220625	1.26831456844401	0.518777567241458	2.4448138249079	0.0144926932864302	up
GALNT8	0.536221533189622	1.44648485492185	0.592277893163325	2.44224015722797	0.014596433021441	up
LEXM	7.70599626824421	0.674461194722774	0.276211816695836	2.44182599713135	0.0146131880514742	up
ADAMTS8	2.64864439599017	0.772585934937048	0.317085744905584	2.43652055429705	0.0148293266453585	up
IL3RA	45.8325692192984	0.532252274895286	0.218683596203687	2.43389208946214	0.0149374475829711	up
PDZK1IP1	28.7509836265115	0.746826135401775	0.307954233552718	2.42512053426253	0.0153033048606307	up
SERTM2	139.658399927194	0.971978036466257	0.401165592668967	2.42288484912093	0.015397806591391	up
TCTE1	5.9847220670342	0.647349239966711	0.267388804529713	2.42100353118852	0.0154777269301387	up
POU2AF1	18.8867628355658	-0.605748	0.25040897853956	-2.41903	0.0155618009940028	down
FOXL1	3.63619643039106	1.06329852226877	0.439676935618415	2.4183632029122	0.0155905064537896	up
PDCD1	11.2604216263027	0.647876540146344	0.267991760037764	2.41752410617046	0.0156264988981334	up
KIF20A	17.1009069459955	-1.07133	0.44430258425288	-2.41126	0.0158977174321316	down
SCG5	30.5823216186017	-0.505585	0.209711586696363	-2.41086	0.0159150157782157	down
CIT	91.6862288859961	-0.565591	0.234628761521436	-2.41058	0.0159272658766617	down
SLC2A14	190.82534139285	0.778993543307284	0.323173901264394	2.41044694593075	0.0159329884516722	up
SQLE	1553.60875507884	0.558062240463525	0.231544485966825	2.4101728794504	0.0159449629880987	up
FGF23	23.8638948044565	1.32561130492272	0.550698209257591	2.40714656891623	0.0160777158418826	up
GAL3ST2	11.3468612711453	0.678166135396303	0.281938521050366	2.40536884732809	0.0161561499602443	up
NCBP2L	2.65200637068669	-1.02997	0.428308518741576	-2.40474	0.0161839349687964	down
ADGRB2	1.36807351424086	-1.00234	0.417079115892288	-2.40325	0.0162501250106127	down
CNTNAP4	1.98502604833071	1.22505770570862	0.509899941305183	2.40254529657889	0.0162814180220726	up
SCAMP5	85.6992758284137	0.717194905627418	0.298550256297967	2.40225854943371	0.0162941872979577	up
ERICH6	2.1339109976339	-0.821818	0.342427374891023	-2.39998	0.0163960165519585	down
IFI6	430.194898246467	0.619228281830939	0.258404869157539	2.39634912395331	0.0165593092754162	up
XG	19.5017443535022	-0.699723	0.29218927917158	-2.39476	0.0166312260391828	down
PCDH10	2.77489153595811	1.36394766949665	0.570202949060839	2.39203896041428	0.0167550636888701	up
CD300E	156.690209759421	0.936506679360158	0.392542069589412	2.38574856534414	0.0170443997515888	up
FETUB	873.391689183805	0.515695601892596	0.216177670151081	2.38551743818956	0.0170551137833298	up
ITGB3	265.844285204485	0.62821896005543	0.263768441163789	2.38170630756138	0.0172326349547283	up
KCNMB1	9.69037200963844	0.534508916907154	0.22476840120366	2.37804297243207	0.0174047974641792	up
ZNF469	103.820372618808	0.567489529435337	0.238765168700794	2.37676848982307	0.0174650458352223	up
FCGBP	82.261878666064	0.615638243595388	0.259157453603069	2.37553747745304	0.0175234127741215	up
H2AC16	1.76674206039867	-1.04288	0.439049907444383	-2.37532	0.0175338132585858	down
UBE2C	12.5493682083279	-1.10854	0.467108195885209	-2.3732	0.0176347373334963	down
SERPINA12	9.42405794899179	0.788020053751966	0.332944135652861	2.36682364807765	0.0179414795903498	up
MT1B	15.3050972966187	1.35306849577112	0.573034686075513	2.36123314809745	0.0182142753803734	up
PKN3	117.912770041144	0.528078551706191	0.223666060080779	2.36101334067167	0.0182250749792746	up
RIBC1	6.69309896600749	-0.545	0.231503527924617	-2.35418	0.0185638631130722	down
DSC1	1.79337258827072	0.772000116700246	0.328087324470118	2.35303243716311	0.0186210096377247	up
REN	8.95427284000682	0.613611947251367	0.261226615103228	2.34896412453566	0.0188257205737303	up
MT1M	1876.14228159789	0.721911901705483	0.308032452806719	2.34362287196557	0.0190974706701325	up
CDH13	62.3522547413946	0.580670846740652	0.248562488607288	2.33611616134916	0.0194851882257782	up
FJX1	88.7767785991303	0.775507221374127	0.332210155848769	2.33438745842303	0.0195754428962899	up
PI15	3.00459642373003	1.16462747544975	0.498906755926279	2.33435899918308	0.0195769317884818	up
LECT2	466.626265949724	-0.650299	0.278696648156952	-2.33336	0.0196294026204675	down
HMGCR	2156.52228082687	0.520016376859003	0.223611774437007	2.32553217811656	0.020043521362559	up
CASP5	10.5157121821341	0.565915422868232	0.243399375063136	2.32504879160614	0.0200693513813096	up
TNIP3	21.334800873217	1.31826698291898	0.568604802594791	2.31842393328926	0.0204262925848622	up
PPFIA4	4.6313402411059	0.797146492638021	0.343940831583123	2.31768496043009	0.0204664489809062	up
PFKP	119.883383143182	0.579748658253187	0.25015796519804	2.31753027649638	0.0204748633429483	up
CCN4	96.7292247215403	0.556407301343424	0.24016357045615	2.31678476584364	0.0205154593081773	up
CCDC167	195.535337685559	-0.529799	0.228734451279004	-2.31622	0.0205462335033833	down
PCDHA1	3.34310397110265	-0.609173	0.263153984451842	-2.31489	0.0206187994771225	down
GPR42	2.92676564328001	1.14089520159305	0.492908917881859	2.31461667704397	0.0206339193740727	up
FAM177B	36.309306339492	0.562039479409445	0.242953204265531	2.31336516473837	0.0207025706613991	up
DCLK3	3.70111513472744	0.813342979970828	0.351666200892803	2.31282670300964	0.0207321690145852	up
ARHGAP11A	26.9249752437778	-0.563326	0.243644419867781	-2.31208	0.0207731890016831	down
POU6F2	20.2390869317207	0.741426782549575	0.321080075561353	2.30916471927857	0.0209344425196116	up
PSPN	3.62594273619314	-0.677984	0.293808744598917	-2.30757	0.0210230613286099	down
RNF151	1.73211412527228	1.15872027511176	0.502996875603597	2.30363314627211	0.0212432455524628	up
NEURL3	24.361436719638	0.785067624119243	0.340907678733552	2.30287457013498	0.0212859013311303	up
HRH4	2.22367139233014	0.929338766027206	0.403579476119619	2.30274040435038	0.0212934534164221	up
BRINP1	7.95966893352674	0.554634597272685	0.241120869812894	2.30023472336954	0.0214349255968958	up
PBK	8.41213935219701	-1.23061	0.535720716650972	-2.29712	0.0216119628397204	down
FAM83B	5.72655960631042	0.804771241950507	0.350667475689017	2.29496972985371	0.0217348590978889	up
HCN1	1.22313567030489	-1.4514	0.635155955496389	-2.28511	0.0223065094465827	down
CDCA2	5.92967652285049	-1.05023	0.460845515762373	-2.27893	0.0226711910116953	down
SH2D5	19.4795933498052	1.45978645015174	0.641324737018422	2.27620480840708	0.0228337542650391	up
PNOC	1.06521062316276	-1.07507	0.472425017365492	-2.27564	0.0228676147863899	down
PRPH2	9.13194132226949	0.575810140025711	0.253640610653931	2.27018117698569	0.0231965925863978	up
NUTM2F	3.97666804688559	0.501647551427391	0.220989569515752	2.27000555965894	0.0232072457196428	up
GRM2	4.34946713750013	0.765877687406789	0.337705492370485	2.26788638239431	0.0233361325484771	up
EVPL	2.38988176920392	-0.692474	0.305637982833993	-2.26567	0.0234717690707629	down
LOC107985729	10.2359982602073	0.568952339935145	0.251285968189363	2.2641627944239	0.0235641039773368	up
APOBEC3H	1.74666409076025	-1.04175	0.460525908260778	-2.26209	0.0236918504269607	down
PHLDA3	22.3450822973645	-0.508537	0.224874340014461	-2.26143	0.023732715705069	down
SMIM24	268.374433932056	-1.10249	0.487698234903617	-2.2606	0.0237839338980875	down
TNR	34.9785689187027	-0.927095	0.410253708080564	-2.25981	0.0238330783801874	down
TRIM31	12.0707198484572	-1.07777	0.477929500061147	-2.25508	0.0241284472809213	down
TMEM252	11.6709408230733	1.03204311156686	0.457689327436708	2.25489879204051	0.0241396821667359	up
CDK1	15.2365286761374	-0.732282	0.324957014287567	-2.25347	0.0242293541297007	down
LRRC9	3.55763703333866	-0.656644	0.291568527371414	-2.25211	0.0243153560207002	down
SOCS1	304.141989514427	0.897482873756279	0.398550998515699	2.25186457215946	0.0243308315700514	up
DLGAP5	9.18152381111758	-1.07277	0.476421065616817	-2.25172	0.0243396905505689	down
MTMR8	4.92787659166608	0.545296816557588	0.242207830624977	2.25135915362662	0.0243627989997978	up
C12orf40	2.3644078310518	0.578624086202988	0.257166390023337	2.24999886707777	0.0244490172272955	up
ELOVL4	1.41778713958919	1.10828429407868	0.493014321122636	2.24797586316563	0.0245777290568466	up
SKAP1	156.444478652307	-0.556423	0.247729648357148	-2.24609	0.0246982273396262	down
NDNF	24.8698307858491	0.602380376560669	0.268210751201961	2.24592181283248	0.0247090164438091	up
OLFM2	778.901748828571	0.571602639681171	0.254661999683469	2.24455411640387	0.0247967711390638	up
SHISA9	49.8835254672803	-0.511974	0.228475657865397	-2.24083	0.0250373440331039	down
TULP1	0.431068303001994	1.3610201287136	0.607853687701254	2.23905876735013	0.0251520926478904	up
FBXO16	16.0288741980025	-0.588789	0.263083782232269	-2.23803	0.0252190867102548	down
ZNF625	8.23267262640118	0.527372071937137	0.235911421828743	2.2354664638492	0.0253867409285249	up
MYH15	1.22377749740085	1.35511399460137	0.606720387486004	2.23350660790614	0.0255155550566374	up
CYP26A1	107.244058884351	0.885842959885017	0.396712416904766	2.23296000361307	0.0255515820446862	up
OR1L8	1.00355985093192	1.19846998742828	0.536849501655902	2.23241333694383	0.0255876571509402	up
USP9Y	188.784940781425	0.835383696318984	0.374210772966442	2.23238815306341	0.0255893201227161	up
TLE3	1048.59535313427	0.639630772162296	0.2865679798793	2.23203852863011	0.0256124165974915	up
CPB1	1.70881020152273	1.04621006378975	0.468814687839865	2.2316068393896	0.0256409592175406	up
NOS2	3.16380781921637	1.19836795292559	0.537325663047311	2.23024514803432	0.0257311724763342	up
KIF25	1.96412310527204	0.765079688720801	0.343284700744697	2.22870313492297	0.0258336635413173	up
SLC2A5	11.6553404990167	0.703366033746788	0.315764068269338	2.22750497737708	0.0259135435262102	up
FNDC5	49.1527419999221	0.679347158785157	0.305045359875817	2.22703652683561	0.0259448326861658	up
RGS2	459.810849506392	0.672807621312466	0.302727078857989	2.2224890612712	0.0262502724673275	up
C15orf48	12.4417649157097	0.924234546953512	0.41587203116999	2.22240131021393	0.0262561968782385	up
CACNA1G	1.82672428849656	1.03065425531673	0.46452029369636	2.21874968500393	0.026503758783149	up
C2orf50	1.43585395430236	0.972326678676776	0.439037442426278	2.21467825911009	0.026782156156377	up
HIVEP2	559.156409702947	0.545863963005875	0.24681720191893	2.21161231373643	0.0269934638610465	up
ELOVL7	22.9277560583404	0.530715092203844	0.240097602625227	2.21041395832781	0.0270764459458827	up
SV2B	18.3439519685711	0.808236189898698	0.365872005681509	2.20906813680155	0.0271699019795466	up
COL4A6	3.22269670223591	0.814788769228554	0.369512126450373	2.20503932321686	0.0274513352578732	up
TNFAIP6	9.39948019772936	0.837533460786506	0.379846114464984	2.20492833516588	0.0274591238051163	up
FFAR3	5.71671669048713	1.06071094537731	0.481128402278297	2.20463173729612	0.0274799468105281	up
CXCL10	17.9789925624759	0.850399863019381	0.385754520714554	2.20451042658979	0.0274884674968974	up
CBLN4	5.66438972363786	-0.835623	0.379225801827705	-2.2035	0.0275598043594797	down
SLC30A3	4.24542261198641	1.07700637634123	0.48938345510766	2.20074129008775	0.0277543439665099	up
MT1A	723.230213688417	0.684855161946428	0.311299393464023	2.1999887450008	0.0278076935699115	up
GRID1	11.2193174572466	-1.02911	0.468996561750833	-2.19427	0.0282156961039788	down
CALML3	11.183328273413	-1.11941	0.510740364099954	-2.19173	0.0283988679788563	down
TUBA3C	1.87350079505171	-1.00736	0.459785010667005	-2.19093	0.0284568268493047	down
CCL7	5.20168803889386	1.94112266711601	0.887243936018053	2.18781170354092	0.0286833210238207	up
SULT1E1	366.962659023875	-0.669493	0.306835495385397	-2.18193	0.0291147342912218	down
MAGEL2	1.39762990494499	1.00689116996553	0.461558480874129	2.18150291174072	0.0291462393287944	up
MROH2B	6.23058103822138	-0.971398	0.445460547297568	-2.18066	0.0292085138030378	down
NUDT8	370.899496291189	-0.50705	0.232668474209987	-2.17928	0.0293107758254747	down
CUBN	5.46080073094077	0.661234932219462	0.303794527174581	2.17658605758711	0.0295114663715776	up
TMC5	22.036927583603	1.07714119658795	0.495135023934031	2.17544941181834	0.0295964551435856	up
SAMSN1	259.633082898169	0.615868706915966	0.283446174284139	2.17278892005292	0.0297962076098941	up
C3orf14	27.5601449847255	-0.515113	0.23715186345215	-2.17208	0.0298495813789609	down
DDX3Y	890.684659386332	0.954723762340679	0.440139523907026	2.16913889910589	0.0300721402409782	up
NLGN4Y	66.872111544976	0.653213659875539	0.301301327778327	2.16797471385895	0.0301606104883385	up
RRM2	86.6511494803449	-0.756119	0.348937787688104	-2.16692	0.0302411367208338	down
THSD7B	3.2961829769666	-1.03689	0.478704597114753	-2.16603	0.0303090451141983	down
LGI1	20.8007862506915	-0.716294	0.33098164239034	-2.16415	0.0304529232292927	down
CRLF1	7.82815524798459	-0.631614	0.292441560245415	-2.1598	0.0307884018757142	down
SGIP1	6.8014503841504	0.556513308870249	0.257795842012454	2.15873655884397	0.0308706107935936	up
FLG	8.02848434614918	0.693229883300964	0.321430940798822	2.15669929465454	0.0310291019913357	up
NDC80	9.02709782041847	-0.871689	0.405237880247343	-2.15106	0.0314718030801873	down
KCNMB2	0.670688190011871	1.24314616299428	0.578012673527902	2.15072475038779	0.0314979316125296	up
ACSM6	0.693515253336121	1.30460086864641	0.606880154417606	2.14968451209015	0.0315801783671084	up
ENOX1	2.88767701301772	0.746162944280244	0.347312425103479	2.14839116123741	0.0316826943562083	up
MAEL	4.00806279764006	1.01198427506083	0.471197372133337	2.14768658509086	0.0317386617704735	up
ATP12A	0.504413319266748	1.83959757052979	0.8583883611456	2.14308307730859	0.0321064280567676	up
GSDMA	5.53034332078495	0.739958199600227	0.346105280721947	2.13795697672319	0.0325202352321079	up
GSTM3	263.50866726179	0.53158044176194	0.248848470204292	2.13616118003674	0.0326662784240726	up
CKMT1A	1.15758916280278	-1.06025	0.496625257128251	-2.13492	0.0327679393448896	down
CABCOCO1	1.31248821474686	1.26487876471949	0.592695122596136	2.1341136724376	0.0328334769495488	up
RGS16	157.000244945595	0.774550269720163	0.36299867844669	2.13375506774445	0.0328628357212471	up
CD300H	3.49118135808704	1.09458915414913	0.513603842226515	2.1311934688884	0.0330732068520436	up
PCDHA5	3.22023606782381	-0.567918	0.266513526456507	-2.13091	0.0330961716715501	down
SOWAHD	5.40519968148292	0.617424134848193	0.290326949550662	2.12665112833576	0.0334490809741631	up
OR7D2	3.8257796907802	1.02633371709742	0.483290857123156	2.12363569881456	0.0337006180193975	up
CDHR1	7.24752677403882	0.663410289956258	0.312568876817005	2.1224451286129	0.0338003759131271	up
FMO2	69.2877370524937	0.613423301370332	0.289761991301068	2.11699021882057	0.0342606779296224	up
GPC3	18.0148430892974	-0.650923	0.307496656034939	-2.11685	0.0342729939939249	down
MB21D2	26.7923401697008	0.584193466269045	0.276064527033214	2.11614825181346	0.034332200775092	up
FCRL5	6.32422640546537	-0.719841	0.341037354578787	-2.11074	0.0347946682095222	down
CYP19A1	0.679434097600602	1.55884415227325	0.73923287400002	2.10873218318644	0.0349677052337412	up
CSMD3	1.09801010457685	-0.969061	0.45962458064754	-2.10837	0.0349985875482809	down
CGAS	30.0407583287845	0.511583578514428	0.242902995365947	2.10612297202716	0.0351936718658648	up
SHCBP1	5.5239219333846	-0.747512	0.35547009550645	-2.10288	0.0354760545628716	down
CDKN3	11.4936137316368	-0.700221	0.333250321187436	-2.10119	0.0356245676719619	down
CHRNA7	2.71194357031905	0.512060304556206	0.243802514304035	2.10030772659563	0.0357017800262842	up
SOCS2	1080.69409140429	-0.52974	0.252568611935849	-2.09741	0.0359572187314289	down
XAGE3	1.67623866275427	-0.966694	0.460998019382974	-2.09696	0.035997247258939	down
FOXM1	58.2241958129337	-0.549253	0.262261928670815	-2.09429	0.0362338649469607	down
GALNT9	2.52069113188279	0.716671895320426	0.342256045133634	2.09396416954623	0.0362631721820906	up
PCDHA11	3.73129990294605	-0.528796	0.253221326189975	-2.08828	0.0367730170147812	down
ADGRG4	4.72413098789015	1.26329175362293	0.605021662756784	2.08801077942686	0.0367968623295851	up
C3orf52	18.3778038494004	0.855736737140293	0.409848901093562	2.08793224736485	0.0368039467856862	up
TMEM121B	7.66435573091472	0.509435724553467	0.244178058405764	2.08632883674957	0.0369488462759015	up
TRPV6	29.661364505396	0.55863860499234	0.267783952262467	2.08615415626099	0.0369646613791682	up
GRIK4	6.30082284840262	-0.822678	0.394424445104846	-2.08577	0.0369995069959615	down
AIM2	9.44261614142174	0.516117124569155	0.248043578053717	2.08075181231817	0.0374566289212309	up
ETV7	31.6950946521185	0.811329739153082	0.390369020749121	2.07836609984095	0.0376756525901368	up
DHDH	9.07374010198672	0.880265337761587	0.423786555929492	2.07714314068057	0.0377883498903457	up
ACTN2	4.15043301771511	0.886612522931897	0.426862178883719	2.07704633202797	0.0377972831714597	up
OOEP	1.12386245143137	-1.06331	0.513089112502921	-2.07238	0.0382302546803575	down
FNDC8	3.18314920340297	0.549674389177646	0.265302287996074	2.07187956549315	0.0382766741014101	up
NEFM	1.58154538069162	1.63646258938143	0.790377956562247	2.07048106009842	0.03840731787603	up
MACC1	15.9520063039545	0.610100240613794	0.295263740421658	2.06628907343153	0.0388011925218413	up
CDCA8	17.4266214471919	-0.567618	0.275076294238652	-2.06349	0.0390659684001744	down
ZSCAN23	6.52702699047785	0.619538981406172	0.301463390294435	2.05510520133499	0.0398688446552525	up
DKK1	3.38807412778374	1.23280954976901	0.600049901112425	2.05451171224847	0.0399261909723279	up
LAMC2	37.2495502905302	0.887905230735542	0.432638986659739	2.0523005510686	0.0401404624951744	up
C5AR1	842.504297345831	0.519278781254307	0.253438329320003	2.04893546547429	0.0404684258011318	up
CHST9	236.410774576494	0.520630783403134	0.254186426051537	2.04822417739008	0.0405380384718858	up
PPP1R14D	0.466102307271167	1.36086037081453	0.665587179224365	2.04460123826362	0.0408941873335454	up
ANGPTL8	709.157104118119	-0.526487	0.257596208281622	-2.04385	0.0409686134406239	down
LPAR3	0.677823698385545	1.78194374974113	0.872058422931737	2.04337657074682	0.0410151749499216	up
ZNF385D	6.12767692496692	0.846587090053073	0.414446395205941	2.04269381962509	0.0410827570197014	up
SLC2A3	853.945179030977	0.700822864391694	0.343422436457448	2.04070203339359	0.0412804531345918	up
C2CD4A	105.987779086568	1.0566512386165	0.518926948433739	2.03622348348984	0.0417279191834562	up
GINS1	17.602484270641	-0.537653	0.264169292825873	-2.03526	0.0418246851364665	down
OR10J5	0.921229455305841	1.22823781874977	0.603807396687319	2.03415	0.0419359727612092	up
RBFOX1	0.730062177209414	0.926726680957432	0.455992905337598	2.03232697287543	0.0421205655978818	up
S100B	10.3987132974539	0.591117899830872	0.290877641208034	2.03218747709835	0.0421346801773021	up
GPRC5A	78.8769530836488	0.880116126473633	0.433272772548981	2.03132110355293	0.042222431958296	up
GRK7	0.684686838913482	1.15733804051268	0.570461513012469	2.02877497274279	0.0424812155420132	up
GLYATL2	1.03093074983232	1.13159807739896	0.557802246437603	2.0286724993058	0.042491658754701	up
CAPN13	2.54315181134458	-0.917001	0.452140586757071	-2.02813	0.0425466441456105	down
PMFBP1	3.40003898350188	0.77529951463452	0.382379041263905	2.02756801751442	0.0426043559406333	up
PTTG1	13.741462918411	-0.671689	0.331653426347017	-2.02527	0.0428392761427593	down
BUB1	13.1297346511562	-0.903529	0.446149545550091	-2.02517	0.0428497525094948	down
IGFBP1	15042.4783823316	-0.646472	0.32017708584153	-2.01911	0.0434761863770431	down
KIAA0408	5.19023854229121	-0.63787	0.316248092705283	-2.01699	0.0436963430949887	down
SMOX	186.280538072273	0.598818163357151	0.297303168662494	2.01416677141757	0.0439920270845186	up
CCDC194	2.36174447318237	0.953835579796813	0.47361378577044	2.01395231400451	0.0440145402869218	up
IER5	390.648284347757	0.547516321281421	0.271921925323722	2.01350560691127	0.0440614657108732	up
KRT73	0.611686118625913	1.25633202338272	0.62424356998037	2.01256702319293	0.04416019910343	up
ITGA8	20.3642469828149	0.607173348282138	0.302173616052383	2.00935262387992	0.0444997507402902	up
LRRIQ4	1.99345560871103	-0.836904	0.416835121284571	-2.00776	0.0446690399631092	down
CD19	2.68787960179736	-0.803815	0.400941759869601	-2.00482	0.0449825552195967	down
UNC5A	7.33611291874032	0.711110312477962	0.355083793888528	2.00265493586903	0.0452143389098051	up
ACP3	6.9513584195968	0.621248801182428	0.310266981081489	2.00230394809322	0.0452520516548111	up
SFN	28.8340743420847	0.840799003320362	0.420759848181912	1.99828716298245	0.0456855364184066	up
FFAR4	3.63165204392447	0.640492101547804	0.321035545134408	1.99508157665111	0.0460339833650409	up
TNFRSF9	19.0625251973031	1.03655034397758	0.519642137730805	1.99473881872634	0.0460713732328241	up
TMEM217	19.3094791776155	0.553286388956173	0.277390456479631	1.9946122010755	0.0460851918309703	up
SMPD3	460.788114031904	0.607352467247063	0.305008338059286	1.99126512773893	0.0464517471272696	up
FFAR2	31.3919689555393	0.590346722214095	0.296846886181273	1.98872465805012	0.0467316027581689	up
FOXD4L1	1.15984552747611	0.90334743164498	0.454366036357456	1.98814911186342	0.0467952011093534	up
LRRC73	5.63606802701775	0.625947687532942	0.314924809679678	1.98760995734067	0.046854844203863	up
FLG2	0.630041025801076	1.45923294907532	0.734490729404842	1.98672752514894	0.0469525998432583	up
ARMS2	0.729220379088259	-1.30948	0.659242456605754	-1.98633	0.0469962733568689	down
KIFC1	18.9790478728656	-0.623845	0.31426798503002	-1.98507	0.0471361452605385	down
STRIT1	0.681209886932893	-1.8633	0.938779194129571	-1.98481	0.0471656842958492	down
S100A2	0.662463188969942	1.37017491453353	0.690484967752904	1.98436603043306	0.0472150500510349	up
GYPA	2.86940996272228	-1.16089	0.585048671766784	-1.98427	0.0472260870029613	down
DRC1	1.0043596370269	1.28934573985256	0.650003118584735	1.98359931358464	0.0473005257970552	up
STC1	34.9869013571794	0.738904205921064	0.372914702366527	1.98142953665264	0.047543124134696	up
CELF5	10.1465730037905	-0.634265	0.320155970509559	-1.98111	0.0475787438266414	down
PRSS22	46.4355399241978	0.885751041407331	0.447566544362664	1.97903764828679	0.047811767641606	up
KNDC1	291.370986165465	0.603266967313481	0.305699791093545	1.97339672740856	0.0484503801837428	up
ODAD2	3.34072503695688	-0.782569	0.396790234041286	-1.97225	0.0485812345744574	down
SLC14A1	14.3814936526607	-0.567966	0.2880345513681	-1.97187	0.0486245359702671	down
PNMA8A	6.08673990875435	0.60697883707687	0.307877926336119	1.97149189713008	0.0486676389235902	up
CLCNKB	0.435254203395609	1.39626040821624	0.708805979113645	1.96987673546751	0.0488524993252934	up
LAMA1	8.00950791649972	0.529963921869705	0.2690871146024	1.96948829249135	0.0488970456851787	up
MTHFD2	83.2955216376722	0.513192207432167	0.260837079297855	1.96748180440305	0.0491276915980442	up
TAS2R43	0.466701009397988	-1.4621	0.744721987895083	-1.96329	0.0496126155771985	down
BNC1	6.37302873303397	0.590171604525336	0.301031230341752	1.96049959286726	0.0499374255210959	up
