# Supplementary material for: Transcriptomic exploration combined with experimental validation: uncovering the potential value of biomarkers related to ammonia-induced cell death in hepatic ischemia–reperfusion injury
Source: Eur J Med Res. 2025 Nov 26;30:1180. doi: 10.1186/s40001-025-03450-1 (PMC12659301; doi:10.1186/s40001-025-03450-1)
Supplement: Supplementary file 6 — Additional file 6. GO enrichment results for candidate genes [file 40001_2025_3450_MOESM6_ESM.xlsx]

## Sheet: Sheet1
ONTOLOGY	ID	Description	GeneRatio	BgRatio	pvalue	p.adjust	qvalue	geneID	Count
BP	GO:0031349	positive regulation of defense response	7/37	441/18614	2.22357e-05	0.0074529	0.00574809	MEFV/SIGLEC16/OSM/FCGR1A/FFAR2/RSAD2/AIM2	7
BP	GO:0002831	regulation of response to biotic stimulus	7/37	463/18614	3.03675e-05	0.0074529	0.00574809	MEFV/SIGLEC16/CD180/FFAR2/RSAD2/PIK3R6/AIM2	7
BP	GO:0001819	positive regulation of cytokine production	7/37	489/18614	4.29975e-05	0.0074529	0.00574809	MEFV/SIGLEC16/OSM/FFAR2/RSAD2/AIM2/TNFRSF8	7
BP	GO:0002833	positive regulation of response to biotic stimulus	6/37	327/18614	4.1231e-05	0.0074529	0.00574809	MEFV/SIGLEC16/CD180/FFAR2/RSAD2/AIM2	6
BP	GO:0002697	regulation of immune effector process	6/37	384/18614	0.000100312	0.0124224	0.00958088	IL7R/JAK3/FCGR1A/FFAR2/RSAD2/PIK3R6	6
BP	GO:0050727	regulation of inflammatory response	6/37	414/18614	0.000151314	0.0143061	0.0110336	MEFV/OSM/FCGR1A/FFAR2/TNFAIP6/AIM2	6
BP	GO:0050729	positive regulation of inflammatory response	5/37	154/18614	1.27855e-05	0.0074529	0.00574809	MEFV/OSM/FCGR1A/FFAR2/AIM2	5
BP	GO:0002819	regulation of adaptive immune response	5/37	205/18614	5.04941e-05	0.00750197	0.00578593	SAMSN1/IL7R/JAK3/FCGR1A/RSAD2	5
BP	GO:0002703	regulation of leukocyte mediated immunity	5/37	246/18614	0.000119447	0.0124224	0.00958088	IL7R/JAK3/FCGR1A/RSAD2/PIK3R6	5
BP	GO:0030217	T cell differentiation	5/37	300/18614	0.000300375	0.02403	0.0185333	IL7R/JAK3/RSAD2/PIK3R6/RUNX2	5
BP	GO:0045088	regulation of innate immune response	5/37	373/18614	0.000809035	0.0382453	0.0294969	MEFV/FFAR2/RSAD2/PIK3R6/AIM2	5
BP	GO:0002443	leukocyte mediated immunity	5/37	401/18614	0.00111819	0.0475314	0.0366589	IL7R/JAK3/FCGR1A/RSAD2/PIK3R6	5
BP	GO:0007259	receptor signaling pathway via JAK-STAT	4/37	173/18614	0.000374618	0.0278287	0.0214631	IL7R/JAK3/OSM/CSF2RA	4
BP	GO:0002706	regulation of lymphocyte mediated immunity	4/37	184/18614	0.000472961	0.0307425	0.0237103	IL7R/FCGR1A/RSAD2/PIK3R6	4
BP	GO:0097696	receptor signaling pathway via STAT	4/37	184/18614	0.000472961	0.0307425	0.0237103	IL7R/JAK3/OSM/CSF2RA	4
BP	GO:0002221	pattern recognition receptor signaling pathway	4/37	189/18614	0.000523248	0.0308386	0.0237844	MEFV/FFAR2/RSAD2/AIM2	4
BP	GO:0002822	regulation of adaptive immune response based on somatic recombination of immune receptors built from immunoglobulin superfamily domains	4/37	190/18614	0.000533745	0.0308386	0.0237844	IL7R/JAK3/FCGR1A/RSAD2	4
BP	GO:0002758	innate immune response-activating signaling pathway	4/37	209/18614	0.000762942	0.0382453	0.0294969	MEFV/FFAR2/RSAD2/AIM2	4
BP	GO:0002218	activation of innate immune response	4/37	233/18614	0.00114258	0.0475314	0.0366589	MEFV/FFAR2/RSAD2/AIM2	4
BP	GO:0002675	positive regulation of acute inflammatory response	3/37	28/18614	2.2887e-05	0.0074529	0.00574809	OSM/FCGR1A/FFAR2	3
BP	GO:0002673	regulation of acute inflammatory response	3/37	48/18614	0.000117572	0.0124224	0.00958088	OSM/FCGR1A/FFAR2	3
BP	GO:0002820	negative regulation of adaptive immune response	3/37	61/18614	0.000240335	0.020829	0.0160645	SAMSN1/IL7R/JAK3	3
CC	GO:0061702	inflammasome complex	3/37	16/19518	3.45256e-06	0.000327993	0.000268936	MEFV/CASP5/AIM2	3
CC	GO:0030669	clathrin-coated endocytic vesicle membrane	3/37	73/19518	0.000355967	0.0169084	0.013864	IL7R/FCGR1A/KIAA0319	3
CC	GO:0045334	clathrin-coated endocytic vesicle	3/37	92/19518	0.000701164	0.0222035	0.0182057	IL7R/FCGR1A/KIAA0319	3
CC	GO:0030665	clathrin-coated vesicle membrane	3/37	136/19518	0.00216209	0.0410797	0.0336831	IL7R/FCGR1A/KIAA0319	3
BP	GO:0032695	negative regulation of interleukin-12 production	2/37	19/18614	0.000643563	0.0352266	0.0271687	JAK3/MEFV	2
BP	GO:0030728	ovulation	2/37	21/18614	0.000788365	0.0382453	0.0294969	RGS2/TNFAIP6	2
BP	GO:0070233	negative regulation of T cell apoptotic process	2/37	24/18614	0.00103225	0.0466758	0.0359989	IL7R/JAK3	2
CC	GO:0001891	phagocytic cup	2/37	28/19518	0.00128132	0.0304314	0.0249521	LCP1/ADGRB1	2
MF	GO:0010854	adenylate cyclase regulator activity	2/36	13/18369	0.000287357	0.034858	0.0261336	RGS2/FFAR2	2
MF	GO:0010851	cyclase regulator activity	2/36	22/18369	0.000841629	0.034858	0.0261336	RGS2/FFAR2	2
MF	GO:0033691	sialic acid binding	2/36	22/18369	0.000841629	0.034858	0.0261336	SIGLEC5/SIGLEC16	2
MF	GO:0005540	hyaluronic acid binding	2/36	24/18369	0.00100311	0.034858	0.0261336	VCAN/TNFAIP6	2
