# Supplementary material for: Transcriptomic exploration combined with experimental validation: uncovering the potential value of biomarkers related to ammonia-induced cell death in hepatic ischemia–reperfusion injury
Source: Eur J Med Res. 2025 Nov 26;30:1180. doi: 10.1186/s40001-025-03450-1 (PMC12659301; doi:10.1186/s40001-025-03450-1)
Supplement: Supplementary file 8 — Additional file 8. KEGG enrichment results for LCP1 [file 40001_2025_3450_MOESM8_ESM.xlsx]

## Sheet: Sheet1
ID	Description	setSize	enrichmentScore	NES	pvalue	p.adjust	qvalue	rank	leading_edge	core_enrichment
KEGG_DRUG_METABOLISM_CYTOCHROME_P450	KEGG_DRUG_METABOLISM_CYTOCHROME_P450	71	-0.726448	-3.35622	1e-10	2.75365e-09	1.69214e-09	2999	tags=77%, list=17%, signal=65%	GSTO1/UGT2A3/MGST2/CYP1A2/FMO1/GSTM5/FMO3/GSTM1/GSTM2/ADH7/MGST1/UGT2B11/CYP3A5/ADH5/CYP2C18/UGT2B10/GSTA3/AOX1/UGT1A1/UGT2B4/FMO5/CYP2C8/GSTK1/GSTZ1/MAOB/ADH4/ADH1A/ADH1C/UGT2B15/ADH6/MAOA/GSTA1/CYP2C19/CYP2B6/UGT2B17/UGT2B7/GSTM3/UGT1A9/FMO4/UGT1A6/UGT1A4/UGT1A7/UGT1A5/CYP3A43/CYP2A7/CYP2C9/UGT1A3/UGT1A8/UGT1A10/CYP2A6/ADH1B/CYP3A4/GSTA5/CYP2A13/CYP3A7
KEGG_RETINOL_METABOLISM	KEGG_RETINOL_METABOLISM	63	-0.734548	-3.27357	1e-10	2.75365e-09	1.69214e-09	1737	tags=70%, list=10%, signal=63%	ADH7/UGT2B11/DHRS4L2/DHRS4/RDH10/RETSAT/CYP3A5/ADH5/CYP2C18/UGT2B10/CYP4A11/CYP4A22/RDH12/UGT1A1/UGT2B4/CYP2C8/RDH5/ADH4/ADH1A/ADH1C/UGT2B15/ADH6/DGAT2/ALDH1A1/CYP2C19/CYP2B6/UGT2B17/UGT2B7/UGT1A9/UGT1A6/UGT1A4/UGT1A7/UGT1A5/CYP3A43/CYP2A7/CYP2C9/UGT1A3/UGT1A8/UGT1A10/CYP2A6/ADH1B/CYP3A4/CYP2A13/CYP3A7
KEGG_METABOLISM_OF_XENOBIOTICS_BY_CYTOCHROME_P450	KEGG_METABOLISM_OF_XENOBIOTICS_BY_CYTOCHROME_P450	69	-0.665214	-3.04847	1e-10	2.75365e-09	1.69214e-09	2999	tags=71%, list=17%, signal=59%	GSTO1/UGT2A3/MGST2/CYP1A2/CYP1A1/GSTM5/AKR1C3/GSTM1/GSTM2/ADH7/MGST1/UGT2B11/CYP3A5/ADH5/CYP2C18/UGT2B10/GSTA3/UGT1A1/UGT2B4/CYP2C8/GSTK1/GSTZ1/ADH4/ADH1A/ADH1C/UGT2B15/ADH6/GSTA1/CYP2C19/CYP2B6/UGT2B17/UGT2B7/GSTM3/UGT1A9/UGT1A6/UGT1A4/UGT1A7/UGT1A5/CYP3A43/CYP2C9/UGT1A3/UGT1A8/EPHX1/UGT1A10/ADH1B/CYP3A4/GSTA5/AKR1C4/CYP3A7
KEGG_DRUG_METABOLISM_OTHER_ENZYMES	KEGG_DRUG_METABOLISM_OTHER_ENZYMES	51	-0.706702	-2.99604	1e-10	2.75365e-09	1.69214e-09	1744	tags=67%, list=10%, signal=60%	TPMT/UGT2B11/DPYS/CES2/CYP3A5/UGT2B10/UGT1A1/NAT1/UGT2B4/DPYD/XDH/CES5A/UGT2B15/TK2/UPP2/UGT2B17/UGT2B7/NAT2/UGT1A9/UGT1A6/UGT1A4/CES1/UGT1A7/UGT1A5/CYP3A43/CYP2A7/UGT1A3/UGT1A8/UGT1A10/CYP2A6/CYP3A4/UPB1/CYP2A13/CYP3A7
KEGG_PEROXISOME	KEGG_PEROXISOME	78	-0.612293	-2.87283	1e-10	2.75365e-09	1.69214e-09	3674	tags=69%, list=21%, signal=55%	ACOX3/MPV17L/NUDT19/ABCD2/PRDX1/MLYCD/PEX11G/PEX3/PEX12/PEX6/SCP2/ACOX1/PAOX/ACSL6/AGPS/DDO/GNPAT/ABCD3/PXMP4/DAO/PEX1/EHHADH/PMVK/CAT/CROT/PEX14/DHRS4/PIPOX/ECI2/PEX7/ABCD4/PEX11A/HSD17B4/AGXT/HAO2/HACL1/EPHX2/PEX11B/PHYH/SLC27A2/XDH/PEX2/GSTK1/HMGCL/ACOX2/BAAT/ACSL1/AMACR/PXMP2/NUDT12/PECR/HAO1/IDH1/PEX19
KEGG_LEISHMANIA_INFECTION	KEGG_LEISHMANIA_INFECTION	69	0.568765	2.63131	1.04192e-10	2.75365e-09	1.69214e-09	5160	tags=65%, list=29%, signal=46%	ITGAM/NCF2/ITGB2/IRAK1/FCGR1A/IL12A/TLR2/IFNGR2/NCF1/NFKBIB/FCGR2A/PTPN6/TNF/MAPK3/HLA-DOA/MAPK13/HLA-DQA2/NFKB1/CYBA/TGFB3/FCGR3A/IFNGR1/FCGR3B/NCF4/IL1A/PTGS2/JUN/HLA-DQA1/CR1/HLA-DRA/IL1B/MAPK11/ITGB1/HLA-DRB1/RELA/HLA-DMB/FCGR2C/ITGA4/STAT1/NFKBIA/TGFB1/JAK1/IFNG/HLA-DRB5/C3
KEGG_CYTOKINE_CYTOKINE_RECEPTOR_INTERACTION	KEGG_CYTOKINE_CYTOKINE_RECEPTOR_INTERACTION	237	0.404517	2.30472	1e-10	2.75365e-09	1.69214e-09	5087	tags=50%, list=29%, signal=36%	CXCL16/CSF3R/CXCR1/CSF1/IL2RA/IL24/IL12RB1/CSF2RB/LTBR/IL4R/CCR1/IL12A/TNFRSF9/RELT/PLEKHO2/CCL20/TNFRSF10A/IL1R2/IFNGR2/TNFRSF1A/IL18RAP/TNFRSF12A/CXCR2/TNFRSF10C/IL21R/IL15RA/CCR3/CCR5/TNFRSF1B/EPO/CCL2/NGFR/TNF/IL2RG/TNFRSF8/CSF2RA/CCL26/ACVRL1/CCL19/CXCL9/INHBB/TNFRSF25/CCL14/IL7/OSMR/IL18R1/CCR2/IFNAR2/TGFB3/KITLG/IFNGR1/CCL18/VEGFA/ACVR1B/TNFSF14/FLT4/CCL7/IL1A/CD70/INHBE/CCR10/TNFSF15/LIF/…
KEGG_STEROID_HORMONE_BIOSYNTHESIS	KEGG_STEROID_HORMONE_BIOSYNTHESIS	53	-0.619803	-2.6457	4.06898e-10	9.40952e-09	5.78224e-09	3537	tags=68%, list=20%, signal=54%	UGT2B28/CYP11A1/AKR1C2/UGT2A3/SRD5A1/HSD3B2/CYP1A1/SULT1E1/AKR1C3/UGT2B11/SRD5A2/SRD5A3/CYP3A5/HSD17B8/UGT2B10/UGT1A1/HSD11B1/CYP7A1/HSD17B3/UGT2B4/UGT2B15/UGT2B17/UGT2B7/UGT1A9/UGT1A6/UGT1A4/UGT1A7/UGT1A5/CYP3A43/UGT1A3/UGT1A8/UGT1A10/AKR1D1/CYP3A4/AKR1C4/CYP3A7
KEGG_VALINE_LEUCINE_AND_ISOLEUCINE_DEGRADATION	KEGG_VALINE_LEUCINE_AND_ISOLEUCINE_DEGRADATION	44	-0.640083	-2.60602	2.82864e-09	5.81443e-08	3.57302e-08	3016	tags=61%, list=17%, signal=51%	HADHB/ECHS1/ACADM/ALDH9A1/ALDH7A1/ACAD8/EHHADH/PCCB/IVD/ALDH6A1/DLD/AOX1/MCCC1/HIBADH/ACADSB/HMGCL/AUH/HADH/HIBCH/DBT/ALDH3A2/BCAT2/MCCC2/BCKDHB/MMUT/ALDH1B1/MCEE
KEGG_FATTY_ACID_METABOLISM	KEGG_FATTY_ACID_METABOLISM	42	-0.635685	-2.5531	4.13458e-09	7.64897e-08	4.70037e-08	3016	tags=62%, list=17%, signal=51%	HADHB/ECHS1/ACADM/ALDH9A1/GCDH/ACOX1/ACSL6/ALDH7A1/ADH7/EHHADH/ECI2/ADH5/CPT2/CYP4A11/CYP4A22/ACADSB/HADH/ADH4/ADH1A/ACADL/ADH1C/ADH6/ALDH3A2/ACSL1/ALDH1B1/ADH1B
KEGG_STARCH_AND_SUCROSE_METABOLISM	KEGG_STARCH_AND_SUCROSE_METABOLISM	51	-0.599553	-2.54178	8.75001e-09	1.47159e-07	9.04308e-08	2105	tags=59%, list=12%, signal=52%	TREH/GYS1/AMY1A/UGT2B11/GBE1/AMY1C/AMY2B/AMY1B/AMY2A/UGT2B10/PGM1/GYS2/UGT1A1/UGT2B4/AGL/PYGL/UGT2B15/ENPP1/UGT2B17/UGT2B7/UGT1A9/UGT1A6/UGT1A4/ENPP3/UGT1A7/UGT1A5/UGT1A3/UGT1A8/UGT1A10/GBA3
KEGG_PORPHYRIN_AND_CHLOROPHYLL_METABOLISM	KEGG_PORPHYRIN_AND_CHLOROPHYLL_METABOLISM	40	-0.632342	-2.49693	1.05987e-08	1.63397e-07	1.00409e-07	1689	tags=50%, list=10%, signal=45%	UGT2B11/CP/UGT2B10/ALAD/COX15/UGT1A1/FECH/UGT2B4/UGT2B15/UGT2B17/UGT2B7/CPOX/UGT1A9/UGT1A6/UGT1A4/UGT1A7/UGT1A5/UGT1A3/UGT1A8/UGT1A10
KEGG_HEMATOPOIETIC_CELL_LINEAGE	KEGG_HEMATOPOIETIC_CELL_LINEAGE	83	0.496075	2.36979	2.44248e-08	3.47583e-07	2.13593e-07	3914	tags=46%, list=22%, signal=36%	ITGAM/CSF3R/CSF1/IL2RA/CD44/FCGR1A/IL4R/IL1R2/ITGA5/CD38/CD9/EPO/TNF/CSF2RA/CD7/CD22/IL7/CR2/KITLG/THPO/IL1A/GP1BB/CD1C/CR1/ITGB3/CD2/IL6/IL3RA/IL1R1/CD55/HLA-DRA/IL1B/CD8A/CSF3/CD59/HLA-DRB1/ITGA3/CD3E
KEGG_PATHOGENIC_ESCHERICHIA_COLI_INFECTION	KEGG_PATHOGENIC_ESCHERICHIA_COLI_INFECTION	55	0.557957	2.46961	4.04286e-08	5.34235e-07	3.28292e-07	3777	tags=55%, list=21%, signal=43%	EZR/ARHGEF2/TUBB4B/TUBA1A/TUBA1B/TUBB/TUBB6/ARPC1B/ACTG1/TUBA1C/KRT18/ARPC3/ARPC5L/ACTB/NCL/CTTN/TUBB2B/NCK2/TUBB2A/YWHAZ/WAS/ARPC4/TUBAL3/TUBA3E/ARPC2/TUBB4A/ITGB1/ABL1/TUBB3/TLR5
KEGG_ASCORBATE_AND_ALDARATE_METABOLISM	KEGG_ASCORBATE_AND_ALDARATE_METABOLISM	25	-0.720891	-2.5572	1.18352e-07	1.45967e-06	8.96982e-07	2868	tags=80%, list=16%, signal=67%	UGT2A3/ALDH9A1/ALDH7A1/UGT2B11/UGT2B10/UGT1A1/UGT2B4/UGT2B15/ALDH3A2/UGT2B17/UGT2B7/UGT1A9/UGT1A6/UGT1A4/UGT1A7/UGT1A5/UGT1A3/UGT1A8/UGT1A10/ALDH1B1
KEGG_PENTOSE_AND_GLUCURONATE_INTERCONVERSIONS	KEGG_PENTOSE_AND_GLUCURONATE_INTERCONVERSIONS	28	-0.678225	-2.44388	1.98001e-07	2.28939e-06	1.40685e-06	3714	tags=71%, list=21%, signal=56%	RPE/UGT2B28/UGT2A3/CRYL1/XYLB/UGT2B11/UGT2B10/UGT1A1/UGT2B4/UGT2B15/UGT2B17/UGT2B7/UGT1A9/UGT1A6/UGT1A4/UGT1A7/UGT1A5/UGT1A3/UGT1A8/UGT1A10
KEGG_GLYCINE_SERINE_AND_THREONINE_METABOLISM	KEGG_GLYCINE_SERINE_AND_THREONINE_METABOLISM	31	-0.64728	-2.40026	3.5368e-07	3.84887e-06	2.36516e-06	2587	tags=61%, list=15%, signal=52%	CBS/GATM/GNMT/SHMT1/BHMT/SARDH/DAO/AMT/GLYCTK/GCAT/PSPH/PIPOX/DMGDH/AGXT/DLD/CHDH/MAOB/MAOA/PSAT1
KEGG_RIBOSOME	KEGG_RIBOSOME	87	0.454859	2.18152	7.6792e-07	7.89251e-06	4.85002e-06	6187	tags=70%, list=35%, signal=46%	RPL10A/RPL35/RPLP0/RPL19/RPS28/RPS5/RPS3/RPS6/RPL3/RPL32/RPL41/RPS9/RPS18/RPL10/RPL8/RPL4/RPL37/RPS19/RPS25/RPS24/RPL13/RPL37A/RPL28/RPL22L1/RPL18A/RPS27A/RPL27A/RPS26/FAU/RPL6/RPS2/RPL18/RPS7/RPL36/RPSA/RPS10/RPLP2/RPS12/RPL35A/RPL31/RPS15A/RPL13A/RPL26L1/RPS27/RPS13/RPS3A/RPL5/RPS16/RPS8/RPL29/RPS21/RPL24/RPL34/RPS11/RPL26/RPS4X/RPS15/RPL38/RPL21/RPL30/RPL23A
KEGG_TRYPTOPHAN_METABOLISM	KEGG_TRYPTOPHAN_METABOLISM	40	-0.580792	-2.29337	8.36054e-07	8.14053e-06	5.00243e-06	2875	tags=55%, list=16%, signal=46%	ECHS1/ALDH9A1/CYP1A2/GCDH/OGDHL/CYP1A1/ALDH7A1/AFMID/EHHADH/CAT/HAAO/DDC/AOX1/TDO2/MAOB/HADH/AADAT/KYNU/ALDH3A2/MAOA/ALDH1B1/ACMSD
KEGG_FC_GAMMA_R_MEDIATED_PHAGOCYTOSIS	KEGG_FC_GAMMA_R_MEDIATED_PHAGOCYTOSIS	96	0.431323	2.13387	1.00656e-06	9.31072e-06	5.72153e-06	2764	tags=36%, list=16%, signal=31%	RAC2/LIMK2/PRKCD/FCGR1A/MARCKS/LIMK1/VAV1/PIK3CD/SYK/CFL1/HCK/PIP5K1C/NCF1/PRKCE/VASP/ARPC1B/FCGR2A/ARPC3/MAPK3/ARPC5L/VAV2/GAB2/PLA2G4E/DOCK2/PIP5K1A/LYN/PIK3R5/FCGR3A/SPHK1/AKT1/PLD2/RPS6KB2/WAS/PLA2G4D/ARPC4
KEGG_CHEMOKINE_SIGNALING_PATHWAY	KEGG_CHEMOKINE_SIGNALING_PATHWAY	184	0.343719	1.8837	4.25483e-06	3.7483e-05	2.30337e-05	5117	tags=44%, list=29%, signal=32%	RAC2/JAK3/CXCL16/CXCR1/PRKCD/FGR/BCAR1/CCR1/VAV1/PIK3CD/CCL20/HCK/GNB2/NCF1/CXCR2/GRK2/NFKBIB/PREX1/CCR3/CCR5/GRK6/CCL2/MAPK3/VAV2/CCL26/CCL19/CXCL9/NFKB1/DOCK2/SHC2/ARRB2/ADCY3/CCL14/LYN/PIK3R5/CCR2/CCL18/CSK/GSK3A/AKT1/CCL7/SHC1/CCR10/GNG2/KRAS/CXCL8/WAS/GNG4/CXCL10/CCR7/CXCL11/STAT3/CXCL5/CCL21/CXCL12/CXCL1/PLCB3/CXCL3/PAK1/RELA/GNG10/GRK5/ADCY2/PF4V1/CCL4/HRAS/CCL3/STAT1/CCL13/NFKBIA/CCL4L2/P…
KEGG_FOCAL_ADHESION	KEGG_FOCAL_ADHESION	194	0.327722	1.81796	9.34891e-06	7.86158e-05	4.83102e-05	4321	tags=38%, list=25%, signal=29%	RAC2/SRC/BCAR1/CCND3/VAV1/PIK3CD/ACTN1/ZYX/COL4A2/ITGA5/PIP5K1C/LAMA5/VASP/PARVB/ACTG1/COL4A1/THBS1/FLNB/LAMB3/ACTN4/PARVG/FLNA/MAPK3/VAV2/THBS2/TNC/COL1A2/SHC2/BIRC3/ACTB/ILK/PIK3R5/TLN2/COL6A2/PPP1CA/COL1A1/SPP1/PAK4/VEGFA/FLT4/AKT1/FLNC/SHC1/ITGB5/JUN/COL5A1/ITGB4/ITGB3/BAD/VCL/TNXB/IBSP/FLT1/VEGFB/COL11A2/ACTN2/PDGFA/ITGB1/LAMB1/MYL12A/COL3A1/COL6A1/ITGA11/PAK1/IGF1/ITGA3/CAV3/PRKCG/HRAS/ITGA…
KEGG_BUTANOATE_METABOLISM	KEGG_BUTANOATE_METABOLISM	32	-0.605168	-2.24965	1.00688e-05	7.8866e-05	4.84639e-05	5146	tags=75%, list=29%, signal=53%	AKR1B10/ACADS/OXCT1/ALDH2/HMGCS2/ACAT1/PDHB/ECHS1/ACSM1/ALDH9A1/ALDH7A1/EHHADH/ACSM4/BDH1/ACSM5/HMGCL/L2HGDH/HADH/ALDH3A2/ACSM2A/ALDH5A1/ACSM3/BDH2/ALDH1B1
KEGG_JAK_STAT_SIGNALING_PATHWAY	KEGG_JAK_STAT_SIGNALING_PATHWAY	133	0.366649	1.90455	1.02313e-05	7.8866e-05	4.84639e-05	5589	tags=51%, list=32%, signal=35%	JAK3/BCL2L1/CSF3R/IL2RA/IL24/IL12RB1/CSF2RB/IL4R/CCND3/IL12A/PIK3CD/CBLC/IFNGR2/STAT5A/SOCS1/IL21R/IL15RA/PTPN6/EPO/IL2RG/TYK2/SPRY4/CSF2RA/IL7/OSMR/PIK3R5/IFNAR2/IFNGR1/AKT1/IRF9/LIF/SPRED1/IL6/IL3RA/PIM1/STAT3/IL2RB/CSF3/STAM/SOCS3/SPRY2/IL22/CRLF2/CBL/SOCS2/STAT1/CNTFR/IL12RB2/MYC/IFNAR1/STAT4/CNTF/PIAS4/IL23A/IL20/CLCF1/JAK1/CTF1/IL5RA/PRL/IFNG/OSM/PIK3CG/GRB2/CISH/CCND1/AKT2/IFNLR1
KEGG_TOLL_LIKE_RECEPTOR_SIGNALING_PATHWAY	KEGG_TOLL_LIKE_RECEPTOR_SIGNALING_PATHWAY	89	0.405289	1.96017	2.33863e-05	0.000173058	0.000106346	4892	tags=48%, list=28%, signal=35%	IRAK1/IRF7/LBP/IL12A/TICAM2/PIK3CD/FADD/TLR2/TRAF3/TNF/MAPK3/MAPK13/CXCL9/NFKB1/MAP3K8/IRF5/PIK3R5/RIPK1/IFNAR2/IKBKE/SPP1/TICAM1/AKT1/JUN/CXCL8/CXCL10/IL6/CXCL11/CASP8/IL1B/MAPK11/MAP2K2/TLR5/RELA/MAP2K3/TLR8/CCL4/CCL3/STAT1/NFKBIA/IFNAR1/RAC1/CD14
KEGG_NATURAL_KILLER_CELL_MEDIATED_CYTOTOXICITY	KEGG_NATURAL_KILLER_CELL_MEDIATED_CYTOTOXICITY	117	0.373167	1.89931	2.56115e-05	0.000182236	0.000111986	2494	tags=31%, list=14%, signal=27%	RAC2/ITGB2/HLA-E/MICB/VAV1/PIK3CD/SYK/TNFRSF10A/IFNGR2/ULBP1/TNFRSF10C/PTPN6/TNF/MAPK3/GZMB/NFATC2/CD247/VAV2/SHC2/FCER1G/ULBP3/CD48/PIK3R5/IFNAR2/RAET1L/ICAM1/FCGR3A/LCP2/IFNGR1/FCGR3B/HCST/SHC1/NCR1/PRF1/HLA-G/KRAS
KEGG_TYROSINE_METABOLISM	KEGG_TYROSINE_METABOLISM	39	-0.53469	-2.11648	4.815e-05	0.000322375	0.000198103	1122	tags=41%, list=6%, signal=38%	HPD/ADH5/FAH/DDC/AOX1/TAT/GSTZ1/MAOB/ADH4/ADH1A/ADH1C/ADH6/MAOA/GOT2/HGD/ADH1B
KEGG_SYSTEMIC_LUPUS_ERYTHEMATOSUS	KEGG_SYSTEMIC_LUPUS_ERYTHEMATOSUS	115	0.369152	1.86798	4.87919e-05	0.000322375	0.000198103	5424	tags=50%, list=31%, signal=35%	FCGR1A/ACTN1/H2AX/FCGR2A/ACTN4/SNRPD1/SNRPB/H2BC15/TNF/HLA-DOA/TRIM21/HLA-DQA2/FCGR3A/H4C2/FCGR3B/H2BC6/C1QA/MACROH2A1/HLA-DQA1/H2BC7/ACTN2/HLA-DRA/H2BC8/H4C15/H3C13/H2BC18/CTSG/H2AC19/HLA-DRB1/H3-5/H2AC18/H4C14/H3-3A/HLA-DMB/FCGR2C/H3-3B/H3C11/C1QC/H2AJ/SSB/H3C4/H3C2/C8B/C1QB/H2AC7/H4C1/IFNG/H2AB1/H2AB3/H2AB2/HLA-DRB5/H2AC8/C3/H2AC15/H4C5/H2AC6/H2AC16/H2AC21
KEGG_LYSINE_DEGRADATION	KEGG_LYSINE_DEGRADATION	44	-0.508668	-2.07098	5.33313e-05	0.000340217	0.000209067	3125	tags=48%, list=18%, signal=39%	DLST/ECHS1/AASDHPPT/ALDH9A1/GCDH/OGDHL/EHMT1/SETD7/ALDH7A1/NSD3/EHHADH/AASDH/PIPOX/SETDB2/TMLHE/AASS/HADH/AADAT/ALDH3A2/BBOX1/ALDH1B1
KEGG_PRIMARY_BILE_ACID_BIOSYNTHESIS	KEGG_PRIMARY_BILE_ACID_BIOSYNTHESIS	16	-0.697172	-2.19442	7.25461e-05	0.000442022	0.000271626	2475	tags=75%, list=14%, signal=64%	SCP2/CYP27A1/CYP46A1/HSD17B4/CYP7A1/SLC27A5/CYP39A1/ACOX2/BAAT/AMACR/AKR1D1/AKR1C4
KEGG_PROPANOATE_METABOLISM	KEGG_PROPANOATE_METABOLISM	32	-0.567023	-2.10785	7.40685e-05	0.000442022	0.000271626	4520	tags=66%, list=26%, signal=49%	ALDH2/LDHC/ACAT1/LDHAL6A/MLYCD/ECHS1/ACADM/ACSS3/ALDH9A1/ALDH7A1/EHHADH/ACACB/SUCLG2/PCCB/ALDH6A1/SUCLG1/HIBCH/ALDH3A2/MMUT/ALDH1B1/MCEE
KEGG_LINOLEIC_ACID_METABOLISM	KEGG_LINOLEIC_ACID_METABOLISM	27	-0.599082	-2.15908	0.000111813	0.00064642	0.000397231	2946	tags=56%, list=17%, signal=46%	PLA2G4A/CYP1A2/PLA2G12A/PLA2G6/PLA2G5/CYP3A5/CYP2C18/PLA2G12B/CYP2J2/CYP2C8/CYP2C19/CYP3A43/CYP2C9/CYP3A4/CYP3A7
KEGG_ARACHIDONIC_ACID_METABOLISM	KEGG_ARACHIDONIC_ACID_METABOLISM	54	-0.458288	-1.96797	0.000122739	0.000688082	0.000422833	3502	tags=43%, list=20%, signal=34%	GPX7/GPX4/CYP4F2/PLA2G4A/PLA2G12A/AKR1C3/ALOX12B/PLA2G6/PLA2G5/CYP2C18/EPHX2/CYP4A11/GGT1/CYP4A22/PLA2G12B/LTA4H/CYP2J2/CYP2C8/CYP2C19/CYP2B6/CYP4F3/CBR1/CYP2C9
KEGG_NOD_LIKE_RECEPTOR_SIGNALING_PATHWAY	KEGG_NOD_LIKE_RECEPTOR_SIGNALING_PATHWAY	60	0.427471	1.9349	0.000219365	0.0011595	0.000712524	3552	tags=42%, list=20%, signal=33%	MEFV/NOD2/NFKBIB/TNFAIP3/CCL2/TNF/MAPK3/TRIP6/CASP5/MAPK13/NFKB1/PSTPIP1/BIRC3/HSP90AB1/RIPK2/CCL7/CXCL8/IL6/NLRP3/CASP8/IL1B/MAPK11/CXCL1/CARD9/PYCARD
KEGG_SPLICEOSOME	KEGG_SPLICEOSOME	126	0.335876	1.73387	0.00021772	0.0011595	0.000712524	5980	tags=52%, list=34%, signal=34%	PRPF19/ALYREF/EIF4A3/SNU13/PUF60/PRPF4/U2AF2/HSPA2/SNRPD1/SNRPB/DHX8/SRSF7/PPIL1/HNRNPC/SF3B4/TCERG1/EFTUD2/HNRNPA1L2/HSPA6/BUD31/U2AF1/SART1/HSPA1B/LSM7/PQBP1/SF3B2/HNRNPM/SF3A3/HSPA1A/PCBP1/SF3B5/PRPF6/DHX16/DDX23/PRPF31/SRSF4/PRPF38B/SNRNP27/PHF5A/DDX39B/TXNL4A/PRPF3/DHX38/ISY1/XAB2/HSPA8/DDX42/HSPA1L/SNW1/SF3A2/SF3A1/ACIN1/RBM17/SNRPA/SNRPG/SNRPF/TRA2B/SNRPA1/SF3B3/CCDC12/LSM6/SNRNP40/SNRNP70…
KEGG_BETA_ALANINE_METABOLISM	KEGG_BETA_ALANINE_METABOLISM	21	-0.618957	-2.13953	0.000253355	0.00130196	0.000800068	3267	tags=62%, list=19%, signal=50%	MLYCD/ECHS1/ACADM/ALDH9A1/ALDH7A1/EHHADH/DPYS/DPYD/HIBCH/ALDH3A2/CNDP1/ALDH1B1/UPB1
KEGG_ANTIGEN_PROCESSING_AND_PRESENTATION	KEGG_ANTIGEN_PROCESSING_AND_PRESENTATION	69	0.407207	1.88388	0.000279367	0.00136008	0.000835781	5452	tags=51%, list=31%, signal=35%	CTSL/HLA-E/TAP2/TAP1/HSPA2/CTSB/KLRC4/HLA-DOA/HLA-F/HLA-DQA2/HSP90AB1/HSPA6/HSPA1B/HLA-G/HLA-DQA1/PSME3/HSPA1A/HSPA5/IFI30/CD74/HLA-DRA/CD8A/CALR/HLA-DRB1/HLA-DMB/HSPA8/HSPA1L/PDIA3/KLRC1/KIR2DL3/KIR2DS4/HLA-DRB5/KIR2DL4/KIR3DL2/CANX
KEGG_LEUKOCYTE_TRANSENDOTHELIAL_MIGRATION	KEGG_LEUKOCYTE_TRANSENDOTHELIAL_MIGRATION	109	0.36051	1.81949	0.000273652	0.00136008	0.000835781	2137	tags=25%, list=12%, signal=22%	RAC2/ITGAM/NCF2/EZR/MMP9/ITGB2/MSN/BCAR1/VAV1/PIK3CD/ACTN1/RASSF5/NCF1/VASP/ACTG1/ACTN4/VAV2/MAPK13/CYBA/JAM3/ACTB/PIK3R5/ESAM/ICAM1/THY1/F11R/NCF4
KEGG_NEUROTROPHIN_SIGNALING_PATHWAY	KEGG_NEUROTROPHIN_SIGNALING_PATHWAY	124	0.331306	1.69569	0.000688817	0.00326747	0.00200789	4326	tags=40%, list=25%, signal=30%	PRKCD/IRAK1/PIK3CD/MAPKAPK2/YWHAH/CALM2/RPS6KA1/NFKBIB/RPS6KA4/ARHGDIA/MAPK7/NFKBIE/NGFR/MAPK3/IRAK2/MAPK13/NFKB1/SHC2/PIK3R5/ATF4/RIPK2/YWHAE/CSK/AKT1/CAMK2B/MAGED1/SH2B2/SHC1/PRDM4/JUN/KRAS/YWHAZ/BAD/ARHGDIB/YWHAG/SH2B3/MAPK11/YWHAB/ZNF274/ABL1/MAP3K5/MAP2K2/NTF3/RELA/NTF4/MAP3K3/HRAS/BCL2/IRAK3
KEGG_REGULATION_OF_ACTIN_CYTOSKELETON	KEGG_REGULATION_OF_ACTIN_CYTOSKELETON	200	0.285416	1.5873	0.00073047	0.00329602	0.00202544	3868	tags=31%, list=22%, signal=24%	RAC2/ITGAM/EZR/LIMK2/ITGAX/ITGB2/MSN/BCAR1/LIMK1/VAV1/PIK3CD/ACTN1/CFL1/ITGA5/PIP5K1C/ARPC1B/FGFR1/ACTG1/FGF21/TMSB4X/ACTN4/ARPC3/PFN1/MAPK3/GNA12/ARPC5L/VAV2/FGF18/ACTB/SLC9A1/PIP5K1A/PIK3R5/PIP4K2A/PPP1CA/ARHGEF1/PAK4/CSK/ITGB5/FGF19/ITGB4/GNA13/KRAS/WAS/ITGB3/IQGAP1/ARPC4/VCL/FGF5/ACTN2/ARPC2/PDGFA/ITGB1/RRAS/MYL12A/DIAPH3/IQGAP3/MAP2K2/FGD3/ITGA11/PAK1/FGF22/ITGA3
KEGG_PATHWAYS_IN_CANCER	KEGG_PATHWAYS_IN_CANCER	316	0.253901	1.5083	0.000725456	0.00329602	0.00202544	4875	tags=36%, list=28%, signal=27%	RAC2/BCL2L1/CSF3R/MMP9/DAPK3/TRAF2/SPI1/PIK3CD/FADD/PPARD/CBLC/RUNX1/COL4A2/AXIN1/RASSF5/HIF1A/LAMA5/STAT5A/EGLN2/NFKB2/FGFR1/RET/RARA/TRAF3/FGF21/COL4A1/LAMB3/EPAS1/MAPK3/TRAF4/FGF18/EGLN3/CSF2RA/PAX8/NFKB1/WNT3/BIRC3/CDKN1A/RASSF1/HSP90AB1/PIK3R5/TGFB3/KITLG/E2F3/WNT9B/ETS1/GLI1/VEGFA/BCR/AKT1/NKX3-1/MMP1/SMAD3/PTGS2/JUN/FGF19/CKS1B/KRAS/DAPK2/CXCL8/TPM3/RALGDS/BAD/MAX/FZD6/TRAF5/IL6/CDKN2B/STA…
KEGG_B_CELL_RECEPTOR_SIGNALING_PATHWAY	KEGG_B_CELL_RECEPTOR_SIGNALING_PATHWAY	73	0.371304	1.73756	0.00164277	0.007236	0.00444659	2818	tags=33%, list=16%, signal=28%	RAC2/LILRB3/VAV1/PIK3CD/SYK/NFKBIB/PTPN6/NFKBIE/MAPK3/NFATC2/VAV2/IFITM1/NFKB1/CD22/LYN/PIK3R5/CR2/PIK3AP1/AKT1/JUN/KRAS/CD79B/BTK/CARD11
KEGG_ARGININE_AND_PROLINE_METABOLISM	KEGG_ARGININE_AND_PROLINE_METABOLISM	54	-0.410337	-1.76206	0.00182874	0.00786785	0.00483486	2830	tags=39%, list=16%, signal=33%	ASS1/PRODH/ALDH9A1/GATM/ACY1/CKB/ALDH7A1/OTC/DAO/OAT/SAT2/CPS1/MAOB/ALDH3A2/MAOA/ARG1/GLS2/GOT2/GLUD2/GLUD1/ALDH1B1
KEGG_ENDOCYTOSIS	KEGG_ENDOCYTOSIS	180	0.283907	1.54534	0.00210188	0.00883746	0.0054307	3140	tags=28%, list=18%, signal=24%	SH3GL1/VPS37C/EHD1/CXCR1/IL2RA/SRC/ARFGAP1/HLA-E/ARFGAP3/ACAP3/HGS/CBLC/CHMP4B/PIP5K1C/RET/CXCR2/CHMP6/GRK2/CLTB/RAB11FIP5/EHD4/HSPA2/CCR5/GRK6/ARAP3/IL2RG/IQSEC2/HLA-F/DNAJC6/ARRB2/SH3KBP1/PIP5K1A/VPS28/HSPA6/PLD2/LDLR/HSPA1B/EHD2/SH3GLB2/HLA-G/VPS4A/DAB2/HSPA1A/ADRB2/RNF41/RAB31/ACAP1/FLT1/AGAP2/IL2RB/VPS37B
KEGG_GRAFT_VERSUS_HOST_DISEASE	KEGG_GRAFT_VERSUS_HOST_DISEASE	37	0.451859	1.82041	0.00215044	0.00884071	0.0054327	5427	tags=57%, list=31%, signal=39%	HLA-E/TNF/GZMB/HLA-DOA/HLA-F/HLA-DQA2/IL1A/PRF1/HLA-G/HLA-DQA1/IL6/HLA-DRA/IL1B/HLA-DRB1/HLA-DMB/KLRC1/IFNG/KIR2DL3/HLA-DRB5/FASLG/KIR3DL2
KEGG_GALACTOSE_METABOLISM	KEGG_GALACTOSE_METABOLISM	26	0.515119	1.90202	0.00239283	0.00962333	0.00591363	2272	tags=38%, list=13%, signal=34%	HK1/HK3/B4GALT2/HK2/PFKP/MGAM/B4GALT1/PFKL/LCT/GALE
KEGG_CYTOSOLIC_DNA_SENSING_PATHWAY	KEGG_CYTOSOLIC_DNA_SENSING_PATHWAY	42	0.428705	1.7927	0.00272031	0.0107076	0.00657993	4872	tags=52%, list=28%, signal=38%	IRF7/NFKBIB/POLR1C/STING1/NFKB1/RIPK1/IKBKE/POLR3C/POLR3D/RIPK3/CXCL10/IL6/IL1B/PYCARD/RELA/AIM2/CCL4/POLR3A/NFKBIA/CCL4L2/POLR3H/IL33
KEGG_PANTOTHENATE_AND_COA_BIOSYNTHESIS	KEGG_PANTOTHENATE_AND_COA_BIOSYNTHESIS	16	-0.599182	-1.88598	0.00309495	0.0119285	0.00733014	1969	tags=56%, list=11%, signal=50%	PANK1/PANK3/DPYS/DPYD/BCAT2/ENPP1/ENPP3/PPCS/UPB1
KEGG_LIMONENE_AND_PINENE_DEGRADATION	KEGG_LIMONENE_AND_PINENE_DEGRADATION	10	-0.673329	-1.82507	0.00379578	0.0142884	0.00878037	2875	tags=70%, list=16%, signal=59%	ALDH2/ECHS1/ALDH9A1/ALDH7A1/EHHADH/ALDH3A2/ALDH1B1
KEGG_TYPE_II_DIABETES_MELLITUS	KEGG_TYPE_II_DIABETES_MELLITUS	44	0.418318	1.77012	0.00386174	0.0142884	0.00878037	1579	tags=25%, list=9%, signal=23%	PKM/HK1/HK3/PRKCD/PIK3CD/HK2/PRKCE/SOCS1/TNF/MAPK3/PIK3R5
KEGG_TYPE_I_DIABETES_MELLITUS	KEGG_TYPE_I_DIABETES_MELLITUS	38	0.437876	1.77884	0.00529644	0.0188431	0.0115793	3321	tags=39%, list=19%, signal=32%	HLA-E/IL12A/TNF/GZMB/HLA-DOA/HLA-F/HLA-DQA2/IL1A/PRF1/HLA-G/HLA-DQA1/PTPRN/HLA-DRA/IL1B/HSPD1
KEGG_AXON_GUIDANCE	KEGG_AXON_GUIDANCE	125	0.29417	1.5107	0.00526162	0.0188431	0.0115793	2564	tags=23%, list=15%, signal=20%	RAC2/PLXNA1/LIMK2/UNC5A/RHOD/RGS3/LIMK1/SEMA4A/CFL1/SEMA4B/NRP1/SEMA3F/SEMA6B/SEMA7A/MAPK3/NFATC2/EFNB2/EFNB1/NTNG1/SEMA4C/PLXNA2/NCK2/SEMA3C/PAK4/SEMA4D/EFNA2/ABLIM2/KRAS/ROBO2
KEGG_ECM_RECEPTOR_INTERACTION	KEGG_ECM_RECEPTOR_INTERACTION	83	0.333641	1.59384	0.00582342	0.020327	0.0124911	3868	tags=35%, list=22%, signal=27%	CD44/COL4A2/ITGA5/LAMA5/COL4A1/THBS1/LAMB3/SDC4/THBS2/TNC/COL1A2/COL6A2/COL1A1/SPP1/ITGB5/COL5A1/ITGB4/GP1BB/ITGB3/TNXB/IBSP/COL11A2/ITGB1/LAMB1/AGRN/COL3A1/COL6A1/ITGA11/ITGA3
KEGG_ABC_TRANSPORTERS	KEGG_ABC_TRANSPORTERS	44	-0.398906	-1.6241	0.00623053	0.0213454	0.0131169	4884	tags=52%, list=28%, signal=38%	ABCC5/ABCB5/ABCA12/ABCC12/ABCC11/ABCC8/ABCC2/ABCB11/ABCC9/ABCD2/ABCC6/ABCA5/ABCD3/ABCG2/ABCA10/ABCD4/ABCG8/ABCA8/ABCA6/ABCB6/ABCB7/ABCG5/ABCA9
KEGG_GLUTATHIONE_METABOLISM	KEGG_GLUTATHIONE_METABOLISM	47	-0.413273	-1.71265	0.00711944	0.0239472	0.0147158	4619	tags=53%, list=26%, signal=39%	GSR/TXNDC12/GSTA4/RRM1/GPX7/GSTM4/ANPEP/GPX4/GSTO1/GCLC/MGST2/GSTM5/GCLM/GSTM1/GSTM2/MGST1/RRM2B/GGT1/GSTA3/GSTK1/GSTZ1/GSTA1/GSTM3/IDH1/GSTA5
KEGG_GLYCOSYLPHOSPHATIDYLINOSITOL_GPI_ANCHOR_BIOSYNTHESIS	KEGG_GLYCOSYLPHOSPHATIDYLINOSITOL_GPI_ANCHOR_BIOSYNTHESIS	25	-0.505874	-1.79448	0.00751666	0.0248318	0.0152594	4144	tags=52%, list=24%, signal=40%	PIGF/PGAP1/PIGX/PIGB/PIGG/PIGY/PIGM/PIGK/PIGN/GPLD1/PIGV/PIGH/PIGP
KEGG_CELL_ADHESION_MOLECULES_CAMS	KEGG_CELL_ADHESION_MOLECULES_CAMS	130	0.280323	1.45529	0.00801085	0.0260001	0.0159773	5355	tags=42%, list=30%, signal=29%	ITGAM/VCAN/ITGB2/HLA-E/CD276/SELPLG/SELL/PVR/SDC4/HLA-DOA/MPZ/HLA-F/HLA-DQA2/JAM3/SELP/NECTIN1/CD22/ESAM/ICAM1/MPZL1/F11R/NECTIN2/HLA-G/CNTNAP1/HLA-DQA1/CD274/CD2/CTLA4/HLA-DRA/PTPRC/CD8A/ITGB1/NRCAM/HLA-DRB1/CD226/PDCD1/CLDN4/ICOSLG/HLA-DMB/PDCD1LG2/ITGA4/MAG/CLDN1/CLDN3/CNTN2/CLDN2/ICAM2/CNTN1/PECAM1/HLA-DRB5/ITGAV/NCAM2/PTPRF/CLDN19
KEGG_MAPK_SIGNALING_PATHWAY	KEGG_MAPK_SIGNALING_PATHWAY	250	0.24025	1.37777	0.00886152	0.0282652	0.0173692	5137	tags=40%, list=29%, signal=29%	RAC2/TRAF2/MAPKAPK2/IL1R2/TNFRSF1A/RASGRP4/NFKB2/FGFR1/RPS6KA1/FGF21/RPS6KA4/FLNB/HSPA2/RELB/SRF/MAPK7/DUSP4/TNF/MAP3K14/FLNA/MAPK3/NFATC2/GNA12/FGF18/DUSP8/DUSP5/MAPK13/PLA2G4E/NFKB1/ARRB2/MAP3K8/ATF4/HSPB1/DUSP6/PLA2G2A/TGFB3/PTPN7/MAP4K4/HSPA6/AKT1/FLNC/MAPK8IP3/IL1A/HSPA1B/DUSP7/GADD45B/JUN/FGF19/CDC25B/KRAS/HSPA1A/MAX/MAP3K6/IL1R1/DUSP14/FGF5/MAPT/DAXX/IL1B/MAP3K11/PDGFA/MAPK11/CACNA2D2/DUSP…
KEGG_PHENYLALANINE_METABOLISM	KEGG_PHENYLALANINE_METABOLISM	18	-0.538992	-1.76602	0.0112933	0.0354111	0.0217604	1122	tags=44%, list=6%, signal=42%	HPD/DDC/TAT/MAOB/PRDX6/PAH/MAOA/GOT2
