# Supplementary material for: Transcriptomic exploration combined with experimental validation: uncovering the potential value of biomarkers related to ammonia-induced cell death in hepatic ischemia–reperfusion injury
Source: Eur J Med Res. 2025 Nov 26;30:1180. doi: 10.1186/s40001-025-03450-1 (PMC12659301; doi:10.1186/s40001-025-03450-1)
Supplement: Supplementary file 9 — Additional file 9. KEGG enrichment results for RGS2 [file 40001_2025_3450_MOESM9_ESM.xlsx]

## Sheet: Sheet1
ID	Description	setSize	enrichmentScore	NES	pvalue	p.adjust	qvalue	rank	leading_edge	core_enrichment
KEGG_RIBOSOME	KEGG_RIBOSOME	87	0.65799	3.10506	1e-10	9.25e-09	6.15789e-09	4958	tags=80%, list=28%, signal=58%	RPL3L/RPS21/RPL9/RSL24D1/RPL38/RPL12/RPL23A/RPLP1/RPS16/RPLP0/RPS3A/RPS20/RPL35A/RPL39/RPL13A/RPL7/RPS17/RPS4Y1/RPL22L1/RPLP2/RPL19/RPL21/RPS10/RPL31/RPS24/RPS15A/RPS27A/RPL28/RPS29/RPL23/RPL36/RPL36A/RPL3/RPS9/UBA52/RPS19/RPL27/RPL13/RPL18A/RPS23/RPL35/RPL37A/RPL29/RPS18/RPSA/RPL5/RPS13/RPL17/RPS15/RPL32/RPL8/RPS27/RPS2/RPL6/RPL24/RPS6/RPL11/RPL36AL/RPL34/RPL10A/RPL41/RPS25/RPS26/RPS12/MRPL13/RP…
KEGG_CYTOKINE_CYTOKINE_RECEPTOR_INTERACTION	KEGG_CYTOKINE_CYTOKINE_RECEPTOR_INTERACTION	237	0.461755	2.57544	1e-10	9.25e-09	6.15789e-09	2965	tags=37%, list=17%, signal=31%	CXCL8/IL18RAP/IL1R2/CLCF1/CCL3/PLEKHO2/IFNG/CD70/IL6/CCL7/CCL4L2/CCL3L3/RELT/CSF3/BMP2/CXCR1/TSLP/CX3CL1/CCL2/LIF/CXCL1/OSM/CCL18/INHBB/INHBA/CCL4/IFNGR1/CCL20/CXCR4/PDGFA/TNFRSF12A/CSF2RA/TNFRSF21/CCL26/TNFSF18/IL15RA/CXCL2/TNFRSF9/IL3RA/IL2RG/IL1A/IL24/TNFSF15/XCR1/TNFRSF1B/IL10/CXCL3/TNFRSF10D/TNFRSF1A/IL20/TNFSF9/CCL8/CSF3R/IFNB1/CCL11/CCL27/IFNGR2/CXCR2/IL19/IL2/TNFRSF10B/CXCL9/TGFB1/TNFRSF1…
KEGG_MAPK_SIGNALING_PATHWAY	KEGG_MAPK_SIGNALING_PATHWAY	250	0.341898	1.92745	5.22651e-08	3.22301e-06	2.14562e-06	1497	tags=22%, list=9%, signal=20%	JUND/DUSP1/JUN/HSPA6/GADD45B/MYC/HSPA1L/MRAS/IL1R2/DUSP2/NR4A1/HSPA1B/DUSP6/DUSP5/FOS/MAP2K3/HSPA1A/SRF/MAPKAPK2/GADD45G/DUSP8/RELB/MAP3K14/DUSP14/GADD45A/HSPB1/PDGFA/PPP3CC/DUSP4/MAP3K8/FGF19/FGF5/FGF21/NFATC2/RASGRP3/IL1A/NFKB2/PLA2G4E/NTRK1/RAC2/FLNC/HSPA8/DUSP16/TNFRSF1A/ARRB2/NFKB1/FGF22/FGF18/HSPA2/RAC1/PRKCG/TRAF2/ATF4/DDIT3/PTPN7
KEGG_GRAFT_VERSUS_HOST_DISEASE	KEGG_GRAFT_VERSUS_HOST_DISEASE	37	0.61015	2.37772	9.17302e-07	3.39402e-05	2.25946e-05	4047	tags=57%, list=23%, signal=44%	IFNG/HLA-G/IL6/HLA-E/HLA-B/HLA-C/IL1A/PRF1/HLA-DQA2/GZMB/KIR3DL2/IL2/HLA-DRB1/KIR2DL1/TNF/IL1B/FASLG/HLA-DRB5/HLA-A/HLA-F/FAS
KEGG_ANTIGEN_PROCESSING_AND_PRESENTATION	KEGG_ANTIGEN_PROCESSING_AND_PRESENTATION	69	0.494568	2.20997	8.00695e-07	3.39402e-05	2.25946e-05	2177	tags=32%, list=12%, signal=28%	HSPA6/HSPA1L/HSPA1B/HLA-G/HSPA1A/HLA-E/HSP90AA1/HLA-B/HSP90AB1/HLA-C/CTSL/LGMN/HLA-DQA2/IFI30/HSPA8/HSPA2/TAP1/KIR3DL2/PSME1/HLA-DRB1/KIR2DL1/B2M
KEGG_PATHOGENIC_ESCHERICHIA_COLI_INFECTION	KEGG_PATHOGENIC_ESCHERICHIA_COLI_INFECTION	55	0.54175	2.33357	1.47869e-06	4.55929e-05	3.0352e-05	3589	tags=55%, list=20%, signal=44%	KRT18/ACTB/ARHGEF2/ACTG1/TUBA1C/TUBB2A/ARPC5L/TUBB6/ARPC2/TUBB2B/EZR/TUBA1A/TUBB4A/TUBB3/TUBA1B/RHOA/ARPC4/TUBA3E/ARPC3/LY96/CLDN1/HCLS1/TUBB4B/WAS/CDC42/ABL1/ARPC5/TUBB8/CD14/YWHAZ
KEGG_ASCORBATE_AND_ALDARATE_METABOLISM	KEGG_ASCORBATE_AND_ALDARATE_METABOLISM	25	-0.670775	-2.25858	7.79774e-06	0.000160287	0.000106706	4387	tags=72%, list=25%, signal=54%	ALDH3A2/ALDH7A1/UGT1A6/UGT1A9/UGT1A4/UGT2B17/UGT2B4/UGT1A7/UGT1A5/UGT2A3/ALDH9A1/UGT1A3/UGT1A10/UGT1A8/ALDH1B1/UGT2B15/UGT1A1/ALDH2
KEGG_TYPE_I_DIABETES_MELLITUS	KEGG_TYPE_I_DIABETES_MELLITUS	38	0.567934	2.24178	7.21322e-06	0.000160287	0.000106706	4191	tags=55%, list=24%, signal=42%	IFNG/HLA-G/HLA-E/HLA-B/HSPD1/HLA-C/IL1A/PRF1/HLA-DQA2/GZMB/IL2/HLA-DRB1/IL12A/TNF/IL1B/FASLG/HLA-DRB5/HLA-A/HLA-F/FAS/PTPRN
KEGG_SPLICEOSOME	KEGG_SPLICEOSOME	126	0.380046	1.90923	6.22139e-06	0.000160287	0.000106706	4824	tags=48%, list=27%, signal=35%	HSPA6/HSPA1L/RBM22/HSPA1B/HSPA1A/RBM17/HNRNPU/SRSF3/TRA2B/EIF4A3/BUD31/SNRPA1/TRA2A/HSPA8/SMNDC1/HSPA2/SNRPD1/SNRNP27/RBM25/PHF5A/SRSF2/HNRNPA1/BCAS2/CWC15/DDX5/SNRPE/SNU13/SLU7/SNRPB/SRSF7/SNRPG/LSM6/SYF2/SF3B6/U2AF1/TCERG1/ALYREF/HNRNPA1L2/PRPF4/SF3B4/HNRNPC/SF3A2/CTNNBL1/PPIE/PUF60/SRSF6/WBP11/LSM2/PQBP1/SF3B5/RBMX/TXNL4A/THOC1/SNRPB2/PRPF38B/DHX15/SNRPD2/SRSF9/SRSF5/CCDC12/THOC3
KEGG_VALINE_LEUCINE_AND_ISOLEUCINE_DEGRADATION	KEGG_VALINE_LEUCINE_AND_ISOLEUCINE_DEGRADATION	44	-0.542344	-2.10042	2.43964e-05	0.000411441	0.000273904	4855	tags=68%, list=28%, signal=49%	BCKDHA/HADHA/ALDH3A2/MCEE/ALDH7A1/IL4I1/DLD/ACAA2/ALDH9A1/ACADM/EHHADH/ALDH1B1/HADHB/ACADS/ALDH6A1/HIBCH/IVD/MCCC1/MMUT/AUH/ACADSB/ALDH2/DBT/BCKDHB/MCCC2/ACAD8/ABAT/OXCT1/PCCA/AOX1
KEGG_NOD_LIKE_RECEPTOR_SIGNALING_PATHWAY	KEGG_NOD_LIKE_RECEPTOR_SIGNALING_PATHWAY	60	0.474551	2.07098	2.4464e-05	0.000411441	0.000273904	1590	tags=33%, list=9%, signal=30%	NFKBIA/CXCL8/IL6/CCL7/RIPK2/HSP90AA1/CCL2/CXCL1/TNFAIP3/NLRP3/HSP90AB1/MEFV/CXCL2/PSTPIP1/TRIP6/NFKB1/BIRC3/CCL8/CCL11/BIRC2
KEGG_N_GLYCAN_BIOSYNTHESIS	KEGG_N_GLYCAN_BIOSYNTHESIS	46	-0.536128	-2.09942	3.17441e-05	0.000489389	0.000325795	2386	tags=37%, list=14%, signal=32%	DPAGT1/DDOST/ALG10B/ALG10/MAN2A1/MGAT5/STT3A/MGAT4A/GANAB/MAN2A2/ALG12/STT3B/ALG11/RFT1/MAN1A2/ST6GAL1/MAN1A1
KEGG_AUTOIMMUNE_THYROID_DISEASE	KEGG_AUTOIMMUNE_THYROID_DISEASE	36	0.541602	2.10299	3.92642e-05	0.000518849	0.000345407	4047	tags=50%, list=23%, signal=39%	HLA-G/HLA-E/HLA-B/HLA-C/TSHR/PRF1/IL10/HLA-DQA2/CGA/GZMB/IL2/HLA-DRB1/CTLA4/FASLG/HLA-DRB5/HLA-A/HLA-F/FAS
KEGG_ABC_TRANSPORTERS	KEGG_ABC_TRANSPORTERS	44	-0.532333	-2.06165	3.76203e-05	0.000518849	0.000345407	4434	tags=61%, list=25%, signal=46%	CFTR/ABCA2/ABCC3/TAP2/ABCC11/ABCA1/ABCB4/ABCB11/ABCA13/ABCB5/ABCD4/ABCC4/ABCB7/ABCB8/ABCC9/ABCB6/ABCA10/ABCB10/ABCG5/ABCC6/ABCA8/ABCA6/ABCC10/ABCD3/ABCG8/ABCA9/ABCC5
KEGG_PARKINSONS_DISEASE	KEGG_PARKINSONS_DISEASE	109	0.374112	1.83667	4.41482e-05	0.000544494	0.00036248	3741	tags=40%, list=21%, signal=32%	UBB/VDAC2/COX7C/CASP9/NDUFS5/COX5A/UQCRB/CYCS/SLC25A6/UBE2J2/COX4I2/COX7A1/NDUFB1/NDUFB9/NDUFB10/COX6C/COX7B/COX8A/NDUFS4/UQCRFS1/COX6B1/NDUFC1/PARK7/UQCRQ/NDUFA2/ATP5PD/COX5B/ATP5PF/ATP5MC3/UQCRC1/UQCRH/NDUFAB1/NDUFA8/UBE2L3/COX4I1/NDUFA3/NDUFC2/NDUFA4/NDUFB6/SEPTIN5/NDUFB2/UQCR10/UQCRHL/ATP5F1E
KEGG_ALLOGRAFT_REJECTION	KEGG_ALLOGRAFT_REJECTION	34	0.560585	2.1309	5.02728e-05	0.000581279	0.000386968	4047	tags=53%, list=23%, signal=41%	IFNG/HLA-G/HLA-E/HLA-B/HLA-C/PRF1/IL10/HLA-DQA2/GZMB/IL2/HLA-DRB1/IL12A/TNF/FASLG/HLA-DRB5/HLA-A/HLA-F/FAS
KEGG_PEROXISOME	KEGG_PEROXISOME	78	-0.438185	-1.91545	5.97773e-05	0.000617046	0.000410779	5727	tags=49%, list=33%, signal=33%	PEX11G/PEX3/MPV17L/PHYH/ABCD1/PEX7/IDH1/PEX10/CAT/ACOX2/AMACR/PEX11A/PEX26/PEX19/MPV17/PIPOX/ABCD4/EHHADH/DDO/PEX2/ACOX1/PECR/CRAT/CROT/PEX12/PEX11B/AGPS/PEX14/HSD17B4/NUDT12/MLYCD/ABCD3/SCP2/ACSL1/PEX6/PEX5/PEX1/FAR2
KEGG_OXIDATIVE_PHOSPHORYLATION	KEGG_OXIDATIVE_PHOSPHORYLATION	113	0.366194	1.8054	6.00369e-05	0.000617046	0.000410779	4321	tags=44%, list=25%, signal=34%	COX7C/ATP6V1G1/NDUFS5/COX5A/UQCRB/PPA1/ATP6V1F/ATP6V0E1/COX4I2/COX7A1/NDUFB1/NDUFB9/ATP5MG/NDUFB10/COX6C/COX7B/COX8A/NDUFS4/UQCRFS1/COX6B1/NDUFC1/ATP12A/UQCRQ/ATP6V1E1/NDUFA2/ATP5PD/COX5B/ATP5PF/ATP5MC3/TCIRG1/UQCRC1/UQCRH/NDUFAB1/NDUFA8/COX4I1/NDUFA3/NDUFC2/NDUFA11/NDUFA4/NDUFB6/NDUFB2/UQCR10/UQCRHL/ATP5F1E/ATP5MF/ATP6V0C/COX17/ATP6V1B2/NDUFV2/PPA2
KEGG_LEISHMANIA_INFECTION	KEGG_LEISHMANIA_INFECTION	69	0.431502	1.92816	9.7598e-05	0.000950297	0.00063263	3236	tags=39%, list=18%, signal=32%	NFKBIA/JUN/PTGS2/IFNG/FOS/NCF2/IFNGR1/NOS2/IL1A/IL10/HLA-DQA2/NFKB1/IFNGR2/CYBA/NCF1/HLA-DRB1/TGFB1/TGFB3/IL12A/TNF/IL1B/RELA/MAPK13/FCGR1A/FCGR2A/ITGAM/MARCKSL1
KEGG_CHEMOKINE_SIGNALING_PATHWAY	KEGG_CHEMOKINE_SIGNALING_PATHWAY	184	0.308263	1.65607	0.000123257	0.00114013	0.000759005	3234	tags=28%, list=18%, signal=23%	NFKBIA/CXCL8/CCL3/CCL7/FGR/CCL4L2/CCL3L3/CXCR1/CX3CL1/CCL2/CXCL1/CCL18/PXN/CCL4/JAK3/CCL20/CXCR4/CCL26/BCAR1/CXCL2/GNG5/XCR1/CXCL3/PRKCD/RAC2/ARRB2/NFKB1/GNB3/RHOA/RAC1/CCL8/CCL11/GNGT2/CCL27/CXCR2/RAP1B/NCF1/IKBKG/GRK6/CXCL9/HCK/CXCR6/HRAS/LYN/WAS/ITK/ADCY2/RELA/SHC1/GNG4/CDC42/CCL14
KEGG_JAK_STAT_SIGNALING_PATHWAY	KEGG_JAK_STAT_SIGNALING_PATHWAY	133	0.336854	1.71678	0.000136051	0.00119855	0.000797894	2965	tags=33%, list=17%, signal=28%	MYC/CLCF1/IFNG/IL6/CSF3/TSLP/SPRY2/BCL2L1/LIF/OSM/JAK3/IFNGR1/CSF2RA/SOCS3/IL15RA/CBLC/IL3RA/PIM1/IL2RG/IL24/IL10/IRF9/IL20/CSF3R/IFNB1/IFNGR2/IL19/IL2/IL12RB2/IL5RA/IL12A/PRL/IL4R/IL7R/CTF1/IL15/CBLB/IL20RB/IL21R/SPRY4/IL6R/IL2RA/IL22/CRLF2
KEGG_CIRCADIAN_RHYTHM_MAMMAL	KEGG_CIRCADIAN_RHYTHM_MAMMAL	12	0.736235	2.15087	0.000334809	0.00269303	0.0017928	1395	tags=67%, list=8%, signal=61%	CRY1/NR1D1/CSNK1D/PER2/CSNK1E/BHLHE40/PER1/BHLHE41
KEGG_NATURAL_KILLER_CELL_MEDIATED_CYTOTOXICITY	KEGG_NATURAL_KILLER_CELL_MEDIATED_CYTOTOXICITY	117	0.337928	1.67971	0.000329023	0.00269303	0.0017928	2674	tags=30%, list=15%, signal=26%	RAET1L/IFNG/HLA-G/HLA-E/HLA-B/IFNGR1/LCP2/MICA/PPP3CC/HLA-C/ULBP2/NFATC2/PRF1/ULBP3/RAC2/TNFRSF10D/RAET1E/FCER1G/GZMB/RAC1/CD247/PRKCG/KIR3DL2/ICAM1/IFNB1/IFNGR2/HCST/TNFRSF10B/ULBP1/KIR2DL1/TNFRSF10A/NFATC1/HRAS/TNF/RAC3
KEGG_LYSINE_DEGRADATION	KEGG_LYSINE_DEGRADATION	44	-0.491088	-1.90191	0.000372085	0.00286815	0.00190938	5559	tags=64%, list=32%, signal=44%	AASDHPPT/PLOD1/ACAT1/SETD1A/HADHA/ALDH3A2/ALDH7A1/AADAT/PIPOX/EHMT1/TMLHE/SETDB1/SETDB2/ALDH9A1/EHHADH/ALDH1B1/OGDHL/SETD2/NSD2/ALDH2/SETMAR/OGDH/SETD1B/EHMT2/NSD3/NSD1/SETD7/ASH1L
KEGG_AMINOACYL_TRNA_BIOSYNTHESIS	KEGG_AMINOACYL_TRNA_BIOSYNTHESIS	41	-0.500997	-1.91963	0.000494039	0.00365589	0.00243379	2843	tags=39%, list=16%, signal=33%	QARS1/IARS2/VARS2/NARS2/AARS1/PARS2/TARS3/DARS2/DARS1/NARS1/LARS2/AARS2/TARS2/EPRS1/LARS1/EARS2
KEGG_PENTOSE_AND_GLUCURONATE_INTERCONVERSIONS	KEGG_PENTOSE_AND_GLUCURONATE_INTERCONVERSIONS	28	-0.556535	-1.92727	0.000662027	0.00471058	0.00313592	4028	tags=57%, list=23%, signal=44%	UGT1A6/UGT1A9/UGT1A4/UGT2B17/UGT2B4/UGT1A7/UGT1A5/UGT2A3/UGT1A3/UGT1A10/UGT1A8/UGT2B15/UGT1A1/RPEL1/XYLB/UGP2
KEGG_PROPANOATE_METABOLISM	KEGG_PROPANOATE_METABOLISM	32	-0.532615	-1.92943	0.00083689	0.00533878	0.00355412	4672	tags=69%, list=27%, signal=51%	PCCB/SUCLG2/ACAT1/HADHA/ALDH3A2/MCEE/ACSS1/ALDH7A1/ALDH9A1/ACADM/EHHADH/ALDH1B1/ALDH6A1/HIBCH/ACACA/MMUT/ALDH2/MLYCD/ACSS3/ABAT/ACACB/PCCA
KEGG_INTESTINAL_IMMUNE_NETWORK_FOR_IGA_PRODUCTION	KEGG_INTESTINAL_IMMUNE_NETWORK_FOR_IGA_PRODUCTION	43	0.465271	1.88654	0.000782142	0.00533878	0.00355412	2540	tags=30%, list=14%, signal=26%	IL6/MAP3K14/CXCR4/IL15RA/ICOSLG/IL10/HLA-DQA2/CCL27/IL2/HLA-DRB1/TGFB1/TNFRSF13B/IL15
KEGG_VIRAL_MYOCARDITIS	KEGG_VIRAL_MYOCARDITIS	68	0.394358	1.75968	0.0008175	0.00533878	0.00355412	1463	tags=24%, list=8%, signal=22%	HLA-G/ACTB/HLA-E/ACTG1/CD55/HLA-B/CXADR/HLA-C/CASP9/ABL2/PRF1/HLA-DQA2/RAC2/CYCS/RAC1/ICAM1
KEGG_PORPHYRIN_AND_CHLOROPHYLL_METABOLISM	KEGG_PORPHYRIN_AND_CHLOROPHYLL_METABOLISM	40	-0.487973	-1.86256	0.00124274	0.00766358	0.00510179	4028	tags=50%, list=23%, signal=39%	UGT1A6/UGT1A9/UGT1A4/UGT2B17/UGT2B4/UGT1A7/UGT1A5/UGT2A3/UGT1A3/UGT1A10/UGT1A8/COX15/CPOX/UGT2B15/UGT1A1/ALAD/EPRS1/FECH/CP/EARS2
KEGG_TRYPTOPHAN_METABOLISM	KEGG_TRYPTOPHAN_METABOLISM	40	-0.48271	-1.84247	0.00160037	0.00955062	0.00635803	4672	tags=55%, list=27%, signal=40%	HADHA/ALDH3A2/CAT/MAOA/ASMT/ALDH7A1/IL4I1/AADAT/CYP1A1/ALDH9A1/TPH2/EHHADH/ALDH1B1/OGDHL/CYP1A2/TPH1/DDC/KYNU/ALDH2/OGDH/AFMID/AOX1
KEGG_HEMATOPOIETIC_CELL_LINEAGE	KEGG_HEMATOPOIETIC_CELL_LINEAGE	83	0.350985	1.64269	0.0017913	0.0103559	0.00689414	3497	tags=35%, list=20%, signal=28%	IL1R2/IL6/CSF3/CD55/CSF2RA/IL3RA/GP1BB/IL1A/CD9/ITGA5/CSF3R/CR2/CD44/CD1C/HLA-DRB1/IL5RA/IL4R/IL7R/TNF/IL1B/IL6R/IL2RA/CD7/FCGR1A/CD19/ITGAM/CD59/CD14/CSF1
KEGG_NON_HOMOLOGOUS_END_JOINING	KEGG_NON_HOMOLOGOUS_END_JOINING	12	-0.681536	-1.90617	0.00325272	0.0172601	0.0114904	1867	tags=50%, list=11%, signal=45%	MRE11/DCLRE1C/LIG4/POLM/RAD50/PRKDC
KEGG_PROTEASOME	KEGG_PROTEASOME	42	0.426217	1.71094	0.00321395	0.0172601	0.0114904	6073	tags=62%, list=35%, signal=41%	IFNG/PSMB4/PSMA6/PSMA7/PSME1/POMP/PSMA4/PSMD7/PSMB6/PSMC3/PSMA2/PSMD12/PSMB1/PSMB3/PSMB9/PSMC4/PSMD4/PSMA3/PSMD13/PSMD6/PSMA1/PSMB8/SEM1/PSMC5/PSMD8/PSMB10
KEGG_BLADDER_CANCER	KEGG_BLADDER_CANCER	42	0.424667	1.70472	0.00345202	0.0172601	0.0114904	987	tags=21%, list=6%, signal=20%	CXCL8/MYC/RASSF1/THBS1/MMP1/CDKN1A/MMP9/E2F3/DAPK3
KEGG_COMPLEMENT_AND_COAGULATION_CASCADES	KEGG_COMPLEMENT_AND_COAGULATION_CASCADES	69	-0.391464	-1.66755	0.00344964	0.0172601	0.0114904	4419	tags=51%, list=25%, signal=38%	F10/CFB/FGB/C2/MASP1/TFPI/F8/F13B/A2M/F13A1/C8B/MBL2/FGA/PLG/CR1/C8A/PROS1/C1R/CFI/F5/C4BPA/C4B/C7/F9/C4A/KNG1/C1S/C6/C9/F7/MASP2/C5/C3/F11/CFH
KEGG_SYSTEMIC_LUPUS_ERYTHEMATOSUS	KEGG_SYSTEMIC_LUPUS_ERYTHEMATOSUS	115	0.30879	1.52501	0.00332441	0.0172601	0.0114904	4149	tags=37%, list=24%, signal=29%	H2BC8/H3-5/IFNG/H3-3B/ACTN2/H2AX/H3C4/H2AZ1/H3C1/H2AC19/IL10/HLA-DQA2/H2AB1/H2AB3/H2AB2/H2AC8/H4C8/H4C5/H2AC18/H2AC7/SNRPD1/H2AC11/H2AC20/HLA-DRB1/H2BC12/SNRPB/H2BC11/H4C1/H3-3A/TNF/H2BC5/C1QA/FCGR1A/FCGR2A/H2BC21/H2AC17/ACTN4/H4C3/HLA-DRB5/MACROH2A1/H2BC15/H2AC21/H2BC7
KEGG_STARCH_AND_SUCROSE_METABOLISM	KEGG_STARCH_AND_SUCROSE_METABOLISM	51	-0.421288	-1.7041	0.00381246	0.0185606	0.0123562	4028	tags=45%, list=23%, signal=35%	UGT1A6/UGT1A9/AMY2A/UGT1A4/ENPP1/UGT2B17/GBA3/UGT2B4/UGT1A7/UGT1A5/UGT2A3/UGT1A3/UGT1A10/UGT1A8/GYS2/GAA/ENPP3/UGT2B15/AGL/UGT1A1/PGM2L1/PGM1/UGP2
KEGG_RETINOL_METABOLISM	KEGG_RETINOL_METABOLISM	63	-0.395174	-1.6607	0.00442506	0.0204659	0.0136245	6252	tags=52%, list=36%, signal=34%	ADH1C/CYP3A43/ADH4/RDH12/CYP2C8/CYP3A4/RDH16/CYP3A7/CYP2C9/ADH1B/RETSAT/UGT1A6/UGT1A9/ADH6/UGT1A4/UGT2B17/CYP1A1/UGT2B4/UGT1A7/UGT1A5/UGT2A3/UGT1A3/UGT1A10/UGT1A8/CYP2C19/CYP1A2/CYP26C1/CYP26B1/UGT2B15/ADH1A/UGT1A1/RDH10/PNPLA4
KEGG_ENDOCYTOSIS	KEGG_ENDOCYTOSIS	180	0.269348	1.4414	0.00434119	0.0204659	0.0136245	3210	tags=28%, list=18%, signal=23%	HSPA6/ARF6/HSPA1L/HSPA1B/CHMP4B/HLA-G/NEDD4L/VPS37B/HSPA1A/HLA-E/CXCR1/LDLR/HLA-B/RAB31/CLTB/CXCR4/ADRB2/HLA-C/EHD1/PIP5K1C/EHD4/CBLC/IL2RG/NTRK1/HSPA8/ARRB2/HSPA2/CLTA/CXCR2/SMURF2/HGS/PRKCI/GRK6/PARD6B/CHMP2B/ASAP1/FLT1/HRAS/VPS37C/VPS25/SH3GL1/CBLB/RAB11B/GIT1/AP2M1/SMURF1/IL2RA/SH3GLB2/CHMP1B/STAM/CDC42
KEGG_LEUKOCYTE_TRANSENDOTHELIAL_MIGRATION	KEGG_LEUKOCYTE_TRANSENDOTHELIAL_MIGRATION	109	0.30315	1.48829	0.00463696	0.0209229	0.0139287	2110	tags=24%, list=12%, signal=21%	VASP/ACTB/CLDN4/ACTG1/NCF2/ACTN2/MYL12B/PXN/MMP9/CXCR4/MYL12A/CD99/EZR/BCAR1/CLDN19/RAC2/RHOA/F11R/RAC1/PRKCG/ICAM1/CYBA/RAP1B/NCF1/CLDN1/RASSF5
KEGG_BETA_ALANINE_METABOLISM	KEGG_BETA_ALANINE_METABOLISM	21	-0.554363	-1.78598	0.00499881	0.0220186	0.0146582	4800	tags=76%, list=27%, signal=55%	CNDP1/AOC2/HADHA/ALDH3A2/AOC3/ALDH7A1/DPYS/ALDH9A1/ACADM/EHHADH/ALDH1B1/HIBCH/ALDH2/DPYD/MLYCD/ABAT
KEGG_BUTANOATE_METABOLISM	KEGG_BUTANOATE_METABOLISM	32	-0.48032	-1.73999	0.00593902	0.0255516	0.0170102	5247	tags=59%, list=30%, signal=42%	ACAT1/PDHA1/HADHA/ALDH3A2/ACSM4/ALDH7A1/ALDH9A1/ACSM2A/EHHADH/L2HGDH/ALDH1B1/ACADS/ALDH5A1/ACSM3/ALDH2/BDH1/ACSM5/ABAT/OXCT1
KEGG_EPITHELIAL_CELL_SIGNALING_IN_HELICOBACTER_PYLORI_INFECTION	KEGG_EPITHELIAL_CELL_SIGNALING_IN_HELICOBACTER_PYLORI_INFECTION	67	0.356552	1.59998	0.00649461	0.0273069	0.0181787	3255	tags=34%, list=19%, signal=28%	NFKBIA/JUN/CXCL8/HBEGF/CXCR1/CXCL1/MAP3K14/ATP6V1G1/NFKB1/F11R/RAC1/ATP6V1F/ATP6V0E1/CXCR2/IKBKG/LYN/ATP6V1E1/GIT1/JAM3/RELA/MAPK13/CDC42/TCIRG1
KEGG_STEROID_HORMONE_BIOSYNTHESIS	KEGG_STEROID_HORMONE_BIOSYNTHESIS	53	-0.400111	-1.62185	0.00701465	0.0282111	0.0187807	4028	tags=42%, list=23%, signal=32%	UGT1A6/AKR1C4/UGT1A9/AKR1D1/UGT1A4/UGT2B17/CYP1A1/UGT2B4/UGT1A7/UGT1A5/UGT2A3/UGT1A3/UGT1A10/UGT1A8/SRD5A2/HSD17B6/CYP7B1/SULT1E1/HSD17B3/UGT2B15/UGT1A1/STS
KEGG_PATHWAYS_IN_CANCER	KEGG_PATHWAYS_IN_CANCER	316	0.232897	1.34835	0.00691921	0.0282111	0.0187807	2701	tags=24%, list=15%, signal=21%	NFKBIA/JUN/CXCL8/MYC/PTGS2/NKX3-1/RASSF1/IL6/FOS/EGLN3/MMP1/HSP90AA1/BMP2/CDKN1A/BCL2L1/TRAF4/LAMC2/RALGDS/MMP9/PPARD/HSP90AB1/PDGFA/CSF2RA/NOS2/RUNX1/ELOC/CASP9/FGF19/FADD/FGF5/E2F3/FGF21/CBLC/WNT10A/DAPK3/NFKB2/NTRK1/RAC2/NFKB1/RHOA/FGF22/CYCS/FGF18/RAC1/BIRC3/SPI1/PRKCG/TRAF2/CSF3R/GLI1/BIRC2/WNT5B/RBX1/WNT6/FGFR1/WNT2/IKBKG/ETS1/CDK4/CCNA1/RASSF5/RALB/TGFB1/CKS1B/EGLN2/FZD9/TGFB3/HRAS/HIF1A/T…
KEGG_MTOR_SIGNALING_PATHWAY	KEGG_MTOR_SIGNALING_PATHWAY	50	-0.407611	-1.63498	0.00733798	0.0288835	0.0192283	5545	tags=54%, list=32%, signal=37%	BRAF/PRKAA2/EIF4B/STRADA/CAB39/CAB39L/RPS6KA3/RICTOR/AKT1/PIK3CB/MAPK1/STK11/IGF1/RPS6KA2/PIK3CA/PIK3R1/ULK2/AKT3/TSC1/RPTOR/RPS6KA6/AKT2/PDPK1/PRKAA1/PIK3R2/MTOR/EIF4E2
KEGG_CYTOSOLIC_DNA_SENSING_PATHWAY	KEGG_CYTOSOLIC_DNA_SENSING_PATHWAY	42	0.398032	1.5978	0.00866067	0.0333797	0.0222215	2998	tags=36%, list=17%, signal=30%	NFKBIA/IL6/POLR1D/CCL4L2/ZBP1/CCL4/STING1/TREX1/NFKB1/IFNB1/POLR1C/IKBKG/POLR3C/IL1B/RELA
KEGG_OTHER_GLYCAN_DEGRADATION	KEGG_OTHER_GLYCAN_DEGRADATION	14	-0.594173	-1.72351	0.00932083	0.0351909	0.0234272	5687	tags=79%, list=32%, signal=53%	FUCA1/HEXA/MAN2C1/ENGASE/AGA/MANBA/NEU4/MAN2B1/NEU3/MAN2B2/GLB1
