# Supplementary material for: Transcriptomic exploration combined with experimental validation: uncovering the potential value of biomarkers related to ammonia-induced cell death in hepatic ischemia–reperfusion injury
Source: Eur J Med Res. 2025 Nov 26;30:1180. doi: 10.1186/s40001-025-03450-1 (PMC12659301; doi:10.1186/s40001-025-03450-1)
Supplement: Supplementary file 10 — Additional file 10. KEGG enrichment results for SLC16A3 [file 40001_2025_3450_MOESM10_ESM.xlsx]

## Sheet: Sheet1
ID	Description	setSize	enrichmentScore	NES	pvalue	p.adjust	qvalue	rank	leading_edge	core_enrichment
KEGG_RIBOSOME	KEGG_RIBOSOME	87	0.683925	3.73173	1e-10	4.625e-09	3.18421e-09	3159	tags=67%, list=18%, signal=55%	RPL10A/RPL19/RPL35/RPS9/RPS18/RPS28/RPS3/RPL3/RPL10/RPS6/RPL41/RPS5/RPL32/RPS25/RPLP0/RPL8/RPS24/RPS19/RPS7/RPL37/RPL37A/FAU/RPL28/RPL27A/RPL18/RPS12/RPL13/RPL35A/RPL31/RPS26/RPS8/RPL36/RPS2/RPL22L1/RPS13/RPL34/RPL36AL/RPL18A/RPL6/RPL30/RPL14/RPL26/RPS11/RPS27/RPS10/RPL26L1/RPL24/RPL13A/RPS15A/RPL29/RPS16/RPL4/RPLP2/RPS27A/RPL23/RPS15/RPL21/RPS3A
KEGG_DRUG_METABOLISM_CYTOCHROME_P450	KEGG_DRUG_METABOLISM_CYTOCHROME_P450	71	-0.637224	-2.68146	1e-10	4.625e-09	3.18421e-09	4675	tags=77%, list=27%, signal=57%	GSTA1/GSTO1/GSTM4/GSTZ1/FMO3/MGST2/GSTM5/GSTA4/CYP2B6/UGT2B11/UGT2B28/GSTA5/GSTK1/GSTM2/UGT2B17/GSTM1/UGT2A3/ADH1A/MGST1/FMO1/UGT2B15/CYP2A7/CYP2A6/UGT2B10/GSTM3/CYP2A13/UGT2B7/ADH5/AOX1/CYP2C8/CYP3A5/CYP2C19/FMO5/UGT1A1/ADH1C/MAOB/CYP2C9/UGT1A9/ADH6/ADH4/CYP3A43/CYP2C18/ADH1B/UGT1A5/UGT1A7/UGT1A3/UGT1A4/CYP3A7/UGT1A8/UGT1A10/UGT2B4/CYP3A4/FMO4/MAOA/UGT1A6
KEGG_RETINOL_METABOLISM	KEGG_RETINOL_METABOLISM	63	-0.63037	-2.5954	1e-10	4.625e-09	3.18421e-09	4006	tags=70%, list=23%, signal=54%	CYP2B6/CYP4A11/UGT2B11/UGT2B28/DHRS4L2/RDH5/CYP4A22/UGT2B17/UGT2A3/LRAT/ADH1A/UGT2B15/CYP2A7/CYP2A6/UGT2B10/CYP2A13/UGT2B7/ADH5/CYP2C8/CYP3A5/DGAT2/RDH10/CYP2C19/UGT1A1/ADH1C/CYP2C9/UGT1A9/ADH6/ADH4/ALDH1A1/CYP3A43/CYP2C18/ADH1B/UGT1A5/RETSAT/UGT1A7/UGT1A3/UGT1A4/CYP3A7/UGT1A8/UGT1A10/UGT2B4/CYP3A4/UGT1A6
KEGG_CYTOKINE_CYTOKINE_RECEPTOR_INTERACTION	KEGG_CYTOKINE_CYTOKINE_RECEPTOR_INTERACTION	237	0.379094	2.3425	1e-10	4.625e-09	3.18421e-09	2856	tags=35%, list=16%, signal=30%	RELT/TNFRSF9/CCL20/CSF3R/IL12RB1/TNFRSF12A/IL4R/IFNGR2/CCL18/IL21R/CCL14/CSF2RB/CCL2/IL24/PLEKHO2/NGFR/IL2RA/TNFRSF1B/IL2RG/TNFRSF1A/IL15RA/CXCR1/LTB/TNFSF14/TNFRSF10C/TNF/TNFRSF8/IL6/LIF/CXCL16/CSF3/TGFB3/LTBR/CCR10/IL12A/CXCR2/TNFSF15/TNFRSF10A/CXCL3/CCL7/CCR1/EPO/IL7/CXCL1/CXCL8/IL18RAP/VEGFA/CD70/TNFSF13B/CCL4/IL1R2/CCR5/CCL8/VEGFB/CCL19/CCL4L2/CCL3/BMP2/IL20/IL1B/CXCL10/TNFRSF11B/IL18R1/IL1R…
KEGG_METABOLISM_OF_XENOBIOTICS_BY_CYTOCHROME_P450	KEGG_METABOLISM_OF_XENOBIOTICS_BY_CYTOCHROME_P450	69	-0.578564	-2.42257	2.55504e-10	9.45366e-09	6.50863e-09	5030	tags=71%, list=29%, signal=51%	AKR1C3/ADH7/GSTA1/GSTO1/GSTM4/GSTZ1/MGST2/GSTM5/GSTA4/CYP2B6/UGT2B11/UGT2B28/GSTA5/GSTK1/GSTM2/UGT2B17/GSTM1/UGT2A3/ADH1A/MGST1/UGT2B15/UGT2B10/GSTM3/UGT2B7/ADH5/CYP2C8/CYP3A5/EPHX1/CYP2C19/UGT1A1/ADH1C/CYP2C9/UGT1A9/ADH6/ADH4/CYP3A43/CYP2C18/ADH1B/UGT1A5/UGT1A7/UGT1A3/UGT1A4/CYP3A7/UGT1A8/UGT1A10/UGT2B4/CYP3A4/AKR1C4/UGT1A6
KEGG_PEROXISOME	KEGG_PEROXISOME	78	-0.551342	-2.37581	1.21684e-09	3.75192e-08	2.58311e-08	4146	tags=62%, list=24%, signal=47%	PEX12/SCP2/HMGCL/PHYH/GSTK1/PIPOX/CRAT/ACOX3/PEX14/DAO/SLC25A17/PEX7/HAO2/PEX11A/MPV17L/ABCD2/EPHX2/NUDT19/CAT/ACOX2/ACSL6/PAOX/PXMP4/ECI2/DDO/PEX11B/XDH/PEX1/EHHADH/AGPS/ABCD3/ABCD4/ACOX1/BAAT/GNPAT/HSD17B4/PEX3/HACL1/AMACR/CROT/SLC27A2/HAO1/IDH1/PECR/ACSL1/PEX2/NUDT12/PEX19
KEGG_DRUG_METABOLISM_OTHER_ENZYMES	KEGG_DRUG_METABOLISM_OTHER_ENZYMES	51	-0.598609	-2.35528	1.59546e-08	4.21658e-07	2.90302e-07	3730	tags=73%, list=21%, signal=57%	UGT2B11/UGT2B28/CES5A/UGT2B17/GMPS/UGT2A3/UGT2B15/CYP2A7/CYP2A6/UGT2B10/CYP2A13/TPMT/UGT2B7/CYP3A5/UPP2/UGT1A1/XDH/CES2/CES1/DPYD/DPYS/UGT1A9/CYP3A43/NAT1/UPB1/UGT1A5/UGT1A7/UGT1A3/UGT1A4/CYP3A7/UGT1A8/UGT1A10/UGT2B4/NAT2/CYP3A4/UGT1A6/TK2
KEGG_LEISHMANIA_INFECTION	KEGG_LEISHMANIA_INFECTION	69	0.488532	2.55244	4.74739e-08	1.09784e-06	7.55835e-07	4479	tags=55%, list=25%, signal=41%	NFKBIB/NCF1/FCGR1A/IFNGR2/NFKB1/PTPN6/IRAK1/JUN/NCF2/TNF/ITGAM/TGFB3/IL12A/CYBA/NCF4/PTGS2/ITGB2/MAPK13/MAPK11/IL1B/TLR2/NFKBIA/HLA-DQA2/HLA-DQA1/MARCKSL1/IL1A/IFNGR1/MAPK3/HLA-DOA/HLA-DRB5/HLA-DRB1/HLA-DRA/IFNG/MAPK12/HLA-DQB1/FCGR2C/FCGR2A/RELA
KEGG_FATTY_ACID_METABOLISM	KEGG_FATTY_ACID_METABOLISM	42	-0.626193	-2.35159	5.61331e-08	1.15385e-06	7.94399e-07	3286	tags=64%, list=19%, signal=52%	ADH7/ACAT1/ALDH7A1/CYP4A11/CYP4A22/HADHA/ACOX3/ADH1A/ACADM/ACADSB/ADH5/ACSL6/ECI2/EHHADH/ALDH9A1/HADHB/ADH1C/ADH6/ACOX1/HADH/ADH4/ALDH3A2/ADH1B/ALDH1B1/ACADL/CPT2/ACSL1
KEGG_STEROID_HORMONE_BIOSYNTHESIS	KEGG_STEROID_HORMONE_BIOSYNTHESIS	53	-0.562688	-2.23793	2.06659e-07	3.82319e-06	2.63218e-06	3848	tags=60%, list=22%, signal=47%	CYP7B1/UGT2B11/UGT2B28/UGT2B17/UGT2A3/CYP11A1/HSD17B12/SRD5A3/CYP7A1/SRD5A2/UGT2B15/HSD17B3/UGT2B10/UGT2B7/CYP3A5/SRD5A1/HSD11B1/UGT1A1/AKR1D1/UGT1A9/CYP3A43/UGT1A5/UGT1A7/UGT1A3/UGT1A4/CYP3A7/UGT1A8/UGT1A10/UGT2B4/CYP3A4/AKR1C4/UGT1A6
KEGG_HEMATOPOIETIC_CELL_LINEAGE	KEGG_HEMATOPOIETIC_CELL_LINEAGE	83	0.438663	2.34656	2.94579e-07	4.95429e-06	3.41092e-06	4499	tags=49%, list=26%, signal=37%	CSF3R/IL4R/CD44/FCGR1A/IL2RA/CD7/CD9/TNF/IL6/ITGAM/CSF3/GP1BB/THPO/EPO/IL7/CD38/ITGA5/IL1R2/CD14/IL1B/CD1C/IL1R1/IL1A/CSF1/ITGB3/IL3RA/CD59/HLA-DRB5/CD3E/HLA-DRB1/CD55/CD37/CD2/HLA-DRA/ITGA3/KITLG/FLT3LG/GP9/CR2/MS4A1/CD22
KEGG_STARCH_AND_SUCROSE_METABOLISM	KEGG_STARCH_AND_SUCROSE_METABOLISM	51	-0.563319	-2.21643	4.63631e-07	7.14764e-06	4.92099e-06	4074	tags=65%, list=23%, signal=50%	GANC/AMY1A/AMY1C/AMY1B/UGT2B11/UGT2B28/PGM2L1/UGT2B17/UGT2A3/UGT2B15/GYS1/UGT2B10/UGT2B7/PYGL/AMY2A/UGT1A1/AMY2B/GBE1/ENPP3/UGT1A9/GYS2/UGT1A5/UGT1A7/UGT1A3/AGL/ENPP1/UGT1A4/UGT1A8/UGT1A10/UGT2B4/PGM1/GBA3/UGT1A6
KEGG_SPLICEOSOME	KEGG_SPLICEOSOME	126	0.354438	1.99001	7.04189e-07	1.00212e-05	6.89934e-06	3031	tags=33%, list=17%, signal=28%	SNU13/EIF4A3/ALYREF/PUF60/SNRPB/BUD31/SNRPD1/PRPF19/PQBP1/U2AF1/SART1/SF3B5/PRPF4/CCDC12/SNRPF/LSM7/PCBP1/U2AF2/HSPA1B/HSPA1A/SRSF7/SNRPG/SRSF9/ISY1/HSPA6/HNRNPM/XAB2/SF3B4/SNRPD3/LSM6/SNRPB2/PPIL1/PRPF6/MAGOH/HSPA2/HNRNPC/PRPF31/TXNL4A/HSPA1L/TCERG1/SNRPA/PHF5A
KEGG_VALINE_LEUCINE_AND_ISOLEUCINE_DEGRADATION	KEGG_VALINE_LEUCINE_AND_ISOLEUCINE_DEGRADATION	44	-0.575152	-2.192	1.53989e-06	2.03485e-05	1.40095e-05	2203	tags=64%, list=13%, signal=56%	ACAT1/IVD/ALDH7A1/ALDH6A1/BCAT2/HMGCL/HADHA/ACADM/ACADSB/AOX1/MCCC1/ACAD8/PCCB/EHHADH/HIBCH/ALDH9A1/HADHB/BCKDHB/HIBADH/DBT/MCCC2/HADH/ALDH3A2/ALDH1B1/MMUT/MCEE/AUH/DLD
KEGG_ASCORBATE_AND_ALDARATE_METABOLISM	KEGG_ASCORBATE_AND_ALDARATE_METABOLISM	25	-0.67691	-2.26323	3.00307e-06	3.70378e-05	2.54997e-05	3730	tags=80%, list=21%, signal=63%	UGT2B11/UGT2B28/UGT2B17/UGT2A3/UGT2B15/UGT2B10/UGT2B7/UGT1A1/ALDH9A1/UGT1A9/ALDH3A2/ALDH1B1/UGT1A5/UGT1A7/UGT1A3/UGT1A4/UGT1A8/UGT1A10/UGT2B4/UGT1A6
KEGG_PENTOSE_AND_GLUCURONATE_INTERCONVERSIONS	KEGG_PENTOSE_AND_GLUCURONATE_INTERCONVERSIONS	28	-0.638468	-2.18316	5.1418e-06	5.59549e-05	3.85237e-05	3730	tags=68%, list=21%, signal=54%	UGT2B11/UGT2B28/UGT2B17/UGT2A3/UGT2B15/UGT2B10/UGT2B7/XYLB/UGT1A1/RPE/UGT1A9/UGT1A5/UGT1A7/UGT1A3/UGT1A4/UGT1A8/UGT1A10/UGT2B4/UGT1A6
KEGG_SYSTEMIC_LUPUS_ERYTHEMATOSUS	KEGG_SYSTEMIC_LUPUS_ERYTHEMATOSUS	115	0.363598	2.04	5.01535e-06	5.59549e-05	3.85237e-05	4437	tags=44%, list=25%, signal=33%	H2BC15/SNRPB/SNRPD1/FCGR1A/H2BC6/C1QA/H2AC19/TNF/H2AC18/ACTN1/H2AX/H3C4/H2AC8/H2BC18/H2AB1/H2AB3/H2AB2/SNRPD3/H3-5/H3-3B/H2BC8/HLA-DQA2/HLA-DQA1/H2AJ/C1QB/H2AC7/H2BC7/H4C15/TRIM21/H4C2/HLA-DOA/H2AC16/H2AC6/H4C4/H2AC20/SSB/H4C12/H4C11/HLA-DRB5/HLA-DRB1/C1QC/H3C10/H4C14/HLA-DRA/IFNG/H2AC17/HLA-DQB1/FCGR2C/H2BC12/FCGR2A/ACTN4
KEGG_LINOLEIC_ACID_METABOLISM	KEGG_LINOLEIC_ACID_METABOLISM	27	-0.622617	-2.11842	1.90267e-05	0.000195552	0.000134633	2519	tags=48%, list=14%, signal=41%	PLA2G4A/CYP2C8/PLA2G6/CYP3A5/CYP2C19/PLA2G12A/CYP2C9/CYP3A43/CYP2C18/CYP3A7/CYP3A4/CYP2J2/PLA2G12B
KEGG_PATHOGENIC_ESCHERICHIA_COLI_INFECTION	KEGG_PATHOGENIC_ESCHERICHIA_COLI_INFECTION	55	0.451074	2.23003	3.83112e-05	0.00037303	0.000256823	3163	tags=47%, list=18%, signal=39%	TUBB4B/ARPC1B/TUBB6/ARPC5L/EZR/TUBA1A/TUBB2B/KRT18/ARHGEF2/ACTG1/ARPC3/TUBB2A/ACTB/TUBA1C/CD14/ARPC4/WAS/TUBA1B/NCL/TUBB3/TUBB/TUBB4A/TUBAL3/NCK2/TUBA3D/TUBA3E
KEGG_GLYCINE_SERINE_AND_THREONINE_METABOLISM	KEGG_GLYCINE_SERINE_AND_THREONINE_METABOLISM	31	-0.569503	-2.00155	5.98093e-05	0.000553236	0.000380891	3453	tags=42%, list=20%, signal=34%	BHMT/PIPOX/SHMT1/PSPH/DAO/GATM/DMGDH/CHDH/MAOB/SARDH/MAOA/DLD/PSAT1
KEGG_ANTIGEN_PROCESSING_AND_PRESENTATION	KEGG_ANTIGEN_PROCESSING_AND_PRESENTATION	69	0.374113	1.95463	9.09934e-05	0.000801608	0.00055189	4752	tags=52%, list=27%, signal=38%	CTSL/HLA-E/TAP1/HSPA1B/HSPA1A/TAP2/HSP90AB1/HSPA6/CTSB/CD74/PSME2/HLA-DQA2/HSPA2/HSPA5/HLA-DQA1/HSPA1L/HLA-F/HLA-DOA/HLA-G/IFI30/HLA-DRB5/HLA-DRB1/HLA-DRA/KIR2DL3/HLA-DQB1/CALR/PSME3/HSPA8/TAPBP/HSP90AA1/KIR3DL2/KLRC4/LTA/HLA-DPB1/RFXANK/CD8A
KEGG_ABC_TRANSPORTERS	KEGG_ABC_TRANSPORTERS	44	-0.504562	-1.92297	0.000192107	0.00161545	0.0011122	4942	tags=55%, list=28%, signal=39%	ABCB5/ABCA2/ABCB10/ABCB11/ABCC9/ABCC2/ABCC12/ABCC5/ABCC3/ABCD2/ABCA8/ABCC11/ABCG2/ABCA6/ABCA10/ABCD3/ABCD4/ABCA5/ABCC6/ABCA9/ABCG8/ABCB6/ABCG5/ABCB7
KEGG_GLYCOSYLPHOSPHATIDYLINOSITOL_GPI_ANCHOR_BIOSYNTHESIS	KEGG_GLYCOSYLPHOSPHATIDYLINOSITOL_GPI_ANCHOR_BIOSYNTHESIS	25	-0.602601	-2.01478	0.000247841	0.00183402	0.00126268	3405	tags=56%, list=19%, signal=45%	PIGM/PIGH/PIGO/PIGF/PIGB/PIGX/PGAP1/PIGY/PIGG/PIGN/PIGV/PIGP/GPLD1/PIGK
KEGG_LYSINE_DEGRADATION	KEGG_LYSINE_DEGRADATION	44	-0.499429	-1.90341	0.000245717	0.00183402	0.00126268	4842	tags=57%, list=28%, signal=41%	ACAT1/ASH1L/NSD1/ALDH7A1/OGDH/NSD3/PIPOX/HADHA/SUV39H2/EHMT1/OGDHL/AASS/AADAT/SETD7/DLST/AASDH/TMLHE/AASDHPPT/EHHADH/ALDH9A1/HADH/BBOX1/ALDH3A2/ALDH1B1/SETDB2
KEGG_TOLL_LIKE_RECEPTOR_SIGNALING_PATHWAY	KEGG_TOLL_LIKE_RECEPTOR_SIGNALING_PATHWAY	89	0.336563	1.83307	0.00023797	0.00183402	0.00126268	2939	tags=36%, list=17%, signal=30%	IRF7/LBP/FADD/NFKB1/IRAK1/JUN/TNF/IL6/IL12A/TICAM1/CXCL8/MAPK13/MAP3K8/CCL4/CD14/MAP2K3/MAPK11/TRAF3/RIPK1/CCL3/AKT1/IL1B/CXCL10/TLR2/MAP2K2/PIK3CD/NFKBIA/SPP1/TICAM2/CXCL9/CXCL11/MAPK3
KEGG_TYPE_I_DIABETES_MELLITUS	KEGG_TYPE_I_DIABETES_MELLITUS	38	0.453363	1.9805	0.00028562	0.0020323	0.00139919	4685	tags=63%, list=27%, signal=46%	HLA-E/GZMB/TNF/IL12A/PRF1/IL1B/HSPD1/FASLG/HLA-DQA2/HLA-DQA1/IL1A/HLA-F/PTPRN/HLA-DOA/HLA-G/HLA-DRB5/HLA-DRB1/HLA-DRA/IFNG/HLA-DQB1/GAD1/LTA/IL2/HLA-DPB1
KEGG_GRAFT_VERSUS_HOST_DISEASE	KEGG_GRAFT_VERSUS_HOST_DISEASE	37	0.471658	2.06835	0.000340929	0.00225257	0.00155084	4685	tags=59%, list=27%, signal=44%	HLA-E/GZMB/TNF/IL6/PRF1/IL1B/FASLG/HLA-DQA2/HLA-DQA1/IL1A/HLA-F/HLA-DOA/HLA-G/HLA-DRB5/HLA-DRB1/HLA-DRA/KIR2DL3/IFNG/HLA-DQB1/KIR3DL2/IL2/HLA-DPB1
KEGG_BUTANOATE_METABOLISM	KEGG_BUTANOATE_METABOLISM	32	-0.544715	-1.93026	0.000332482	0.00225257	0.00155084	5279	tags=62%, list=30%, signal=44%	AKR1B10/ACAT1/ACSM1/ALDH7A1/HMGCL/ACSM5/PDHA1/BDH1/HADHA/ACSM3/PDHB/EHHADH/ALDH9A1/ALDH5A1/HADH/ALDH3A2/ALDH1B1/BDH2/ACSM2A/L2HGDH
KEGG_NOD_LIKE_RECEPTOR_SIGNALING_PATHWAY	KEGG_NOD_LIKE_RECEPTOR_SIGNALING_PATHWAY	60	0.372273	1.90245	0.00050628	0.00314287	0.0021638	2939	tags=42%, list=17%, signal=35%	NFKBIB/BIRC3/CCL2/NFKB1/TNF/MEFV/IL6/NOD2/PYCARD/TNFAIP3/CCL7/CASP5/CXCL1/CXCL8/RIPK2/MAPK13/HSP90AB1/TRIP6/MAPK11/CCL8/IL1B/NFKBIA/CARD9/PSTPIP1/MAPK3
KEGG_CITRATE_CYCLE_TCA_CYCLE	KEGG_CITRATE_CYCLE_TCA_CYCLE	29	-0.538656	-1.85475	0.000523397	0.00314287	0.0021638	4465	tags=55%, list=25%, signal=41%	SDHB/OGDH/PDHA1/SUCLG1/SUCLA2/MDH1/OGDHL/SUCLG2/DLST/PDHB/SDHC/SDHD/FH/ACO1/IDH1/DLD
KEGG_JAK_STAT_SIGNALING_PATHWAY	KEGG_JAK_STAT_SIGNALING_PATHWAY	133	0.279252	1.59703	0.000526644	0.00314287	0.0021638	2723	tags=26%, list=15%, signal=22%	JAK3/SOCS1/BCL2L1/CSF3R/IL12RB1/CBLC/IL4R/IFNGR2/IL21R/CSF2RB/IL24/CCND3/IL2RA/PTPN6/IL2RG/IL15RA/SPRY4/IL6/LIF/CSF3/IL12A/STAT5A/EPO/IL7/SOCS3/IL20/AKT1/MYC/PIK3CD/STAT4/TYK2/IFNGR1/OSMR/PIM1
KEGG_PORPHYRIN_AND_CHLOROPHYLL_METABOLISM	KEGG_PORPHYRIN_AND_CHLOROPHYLL_METABOLISM	40	-0.504514	-1.87429	0.000570948	0.00330079	0.00227252	3730	tags=55%, list=21%, signal=43%	UGT2B11/UGT2B28/UGT2B17/UGT2A3/UGT2B15/UGT2B10/UGT2B7/UGT1A1/ALAD/UGT1A9/CP/UGT1A5/UGT1A7/UGT1A3/UGT1A4/UGT1A8/UGT1A10/UGT2B4/FECH/COX15/CPOX/UGT1A6
KEGG_CYTOSOLIC_DNA_SENSING_PATHWAY	KEGG_CYTOSOLIC_DNA_SENSING_PATHWAY	42	0.421822	1.92485	0.00082977	0.00465174	0.00320262	3745	tags=45%, list=21%, signal=36%	NFKBIB/IRF7/POLR1C/STING1/POLR3D/NFKB1/IL6/PYCARD/CCL4/CCL4L2/RIPK1/IL1B/CXCL10/AIM2/NFKBIA/POLR3H/POLR3C/CCL5/IFNB1
KEGG_CHEMOKINE_SIGNALING_PATHWAY	KEGG_CHEMOKINE_SIGNALING_PATHWAY	184	0.250316	1.50526	0.000936858	0.00509761	0.00350959	2824	tags=26%, list=16%, signal=22%	GNB2/BCAR1/NFKBIB/NCF1/JAK3/CCL20/CCL18/CCL14/FGR/CCL2/VAV1/NFKB1/GSK3A/RAC2/GRK6/CXCR1/SHC2/CXCL16/CCR10/CXCR2/CXCL3/CCL7/CSK/CCR1/CXCL1/CXCL8/CCL4/CCR5/HCK/PRKCD/CCL8/CCL19/CCL4L2/CCL3/WAS/AKT1/ADCY3/CXCL10/CCR3/LYN/PIK3CD/NFKBIA/CCL3L3/CCR2/CXCL5/CXCL9/XCL1/CXCL11
KEGG_PROPANOATE_METABOLISM	KEGG_PROPANOATE_METABOLISM	32	-0.518389	-1.83697	0.00120533	0.00637103	0.00438632	3065	tags=62%, list=17%, signal=52%	PCCA/MLYCD/ACAT1/ALDH7A1/ALDH6A1/HADHA/SUCLG1/SUCLA2/ACSS3/ACADM/SUCLG2/PCCB/EHHADH/HIBCH/ALDH9A1/ACACB/ALDH3A2/ALDH1B1/MMUT/MCEE
KEGG_TRYPTOPHAN_METABOLISM	KEGG_TRYPTOPHAN_METABOLISM	40	-0.480372	-1.7846	0.00171439	0.00881007	0.00606554	2406	tags=40%, list=14%, signal=35%	OGDHL/KYNU/AADAT/AFMID/CAT/AOX1/TDO2/DDC/EHHADH/ALDH9A1/MAOB/HADH/ACMSD/ALDH3A2/ALDH1B1/MAOA
KEGG_BETA_ALANINE_METABOLISM	KEGG_BETA_ALANINE_METABOLISM	21	-0.56601	-1.83109	0.00180177	0.00900886	0.0062024	3065	tags=52%, list=17%, signal=43%	HADHA/ACADM/EHHADH/HIBCH/ALDH9A1/DPYD/DPYS/UPB1/CNDP1/ALDH3A2/ALDH1B1
KEGG_ASTHMA	KEGG_ASTHMA	28	0.460509	1.84053	0.00375722	0.0178677	0.0123015	5296	tags=54%, list=30%, signal=37%	FCER1G/TNF/HLA-DQA2/HLA-DQA1/HLA-DOA/HLA-DRB5/HLA-DRB1/CCL11/HLA-DRA/PRG2/HLA-DQB1/RNASE3/HLA-DPB1/HLA-DMB/EPX
KEGG_NUCLEOTIDE_EXCISION_REPAIR	KEGG_NUCLEOTIDE_EXCISION_REPAIR	44	-0.443779	-1.69132	0.0037667	0.0178677	0.0123015	4290	tags=48%, list=24%, signal=36%	RPA3/GTF2H1/POLE/ERCC3/XPC/GTF2H5/ERCC6/POLE2/MNAT1/PCNA/ERCC4/ERCC8/XPA/RFC1/RPA1/RFC5/RFC3/RAD23B/CUL4A/CUL4B/ERCC5
KEGG_ALLOGRAFT_REJECTION	KEGG_ALLOGRAFT_REJECTION	34	0.413403	1.75997	0.00404223	0.0184774	0.0127213	4685	tags=53%, list=27%, signal=39%	HLA-E/GZMB/TNF/IL12A/PRF1/FASLG/HLA-DQA2/HLA-DQA1/HLA-F/HLA-DOA/HLA-G/HLA-DRB5/HLA-DRB1/HLA-DRA/IFNG/HLA-DQB1/IL2/HLA-DPB1
KEGG_HISTIDINE_METABOLISM	KEGG_HISTIDINE_METABOLISM	29	-0.485918	-1.67316	0.00409499	0.0184774	0.0127213	1462	tags=31%, list=8%, signal=28%	ASPA/DDC/ALDH9A1/MAOB/CNDP1/ALDH3A2/ALDH1B1/HNMT/MAOA
KEGG_LEUKOCYTE_TRANSENDOTHELIAL_MIGRATION	KEGG_LEUKOCYTE_TRANSENDOTHELIAL_MIGRATION	109	0.266118	1.48123	0.00537082	0.0236572	0.0162875	2424	tags=26%, list=14%, signal=22%	BCAR1/NCF1/MMP9/VAV1/ICAM1/RAC2/EZR/NCF2/ESAM/ITGAM/ACTN1/CYBA/NCF4/ACTG1/SIPA1/MSN/ITGB2/ACTB/MAPK13/JAM3/THY1/F11R/RASSF5/MAPK11/CLDN3/CLDN4/VASP/PIK3CD
KEGG_INTESTINAL_IMMUNE_NETWORK_FOR_IGA_PRODUCTION	KEGG_INTESTINAL_IMMUNE_NETWORK_FOR_IGA_PRODUCTION	43	0.360068	1.64905	0.0079687	0.034284	0.0236038	4786	tags=44%, list=27%, signal=32%	IL15RA/MAP3K14/IL6/LTBR/CCR10/TNFSF13B/HLA-DQA2/HLA-DQA1/ICOSLG/TNFSF13/HLA-DOA/HLA-DRB5/HLA-DRB1/HLA-DRA/HLA-DQB1/CCL27/IL2/HLA-DPB1/PIGR
KEGG_PRIMARY_BILE_ACID_BIOSYNTHESIS	KEGG_PRIMARY_BILE_ACID_BIOSYNTHESIS	16	-0.561492	-1.65303	0.00989128	0.0394149	0.0271363	5429	tags=88%, list=31%, signal=61%	CYP27A1/CYP8B1/SLC27A5/SCP2/CYP46A1/CYP7B1/CYP7A1/ACOX2/CYP39A1/AKR1D1/BAAT/HSD17B4/AMACR/AKR1C4
KEGG_RENIN_ANGIOTENSIN_SYSTEM	KEGG_RENIN_ANGIOTENSIN_SYSTEM	16	-0.559834	-1.64815	0.0102266	0.0394149	0.0271363	4257	tags=56%, list=24%, signal=43%	AGT/CMA1/ANPEP/ENPEP/ACE2/AGTR1/LNPEP/MME/NLN
KEGG_TYROSINE_METABOLISM	KEGG_TYROSINE_METABOLISM	39	-0.444122	-1.64219	0.00961589	0.0394149	0.0271363	5737	tags=54%, list=33%, signal=36%	METTL2B/TH/HEMK1/ADH7/GSTZ1/METTL6/FAH/DCT/ADH1A/ADH5/AOX1/DDC/HGD/TAT/ADH1C/MAOB/ADH6/ADH4/GOT2/ADH1B/MAOA
KEGG_ALANINE_ASPARTATE_AND_GLUTAMATE_METABOLISM	KEGG_ALANINE_ASPARTATE_AND_GLUTAMATE_METABOLISM	31	-0.456534	-1.60451	0.0101736	0.0394149	0.0271363	2082	tags=29%, list=12%, signal=26%	GLS2/CPS1/DDO/ASPA/GLUD2/ALDH5A1/GOT2/GLUD1/NIT2
KEGG_LONG_TERM_POTENTIATION	KEGG_LONG_TERM_POTENTIATION	66	-0.375995	-1.56685	0.0101162	0.0394149	0.0271363	4177	tags=38%, list=24%, signal=29%	PLCB1/CAMK4/PPP3R1/CAMK2G/BRAF/RPS6KA6/CALML3/MAPK1/NRAS/PPP1CB/MAP2K1/EP300/PPP3CA/ITPR2/RPS6KA2/PRKCA/CHP1/RAP1A/CAMK2D/CREBBP/ADCY1/PPP3CB/PPP1CC/PRKACB/GNAQ
